# Supplementary material for: Elevated nuclear TDP-43 induces constitutive exon skipping
Source: PubMed Central journal article supplement — bioRxiv. 2023 May 12:2023.05.11.540291. Preprint. [Version 1] doi: 10.1101/2023.05.11.540291 (PMC10197708; doi:10.1101/2023.05.11.540291), 2023-05-12
Supplement: media-2.pdf [file media-2.pdf]

## Supplementary Data

**Title:** Elevated nuclear TDP-43 induces constitutive exon skipping

**Authors:** Rogger P. Carmen-Orozco<sup>1,2,\*</sup>, William Tsao<sup>1,2,\*</sup>, Yingzhi Ye<sup>3,\*</sup>, Irika Sinha<sup>1,2</sup>, Koping Chang<sup>1</sup>, Vickie Trinh<sup>1,2</sup>, William Chung<sup>1</sup>, Kyra Bowden<sup>1</sup>, Juan C. Troncoso<sup>1</sup>, Seth Blackshaw<sup>2,4,5</sup>, Lindsey R. Hayes<sup>5</sup>, Shuying Sun<sup>3</sup>, Philip C. Wong<sup>1,2</sup>, Jonathan P. Ling<sup>1,#</sup>

**Affiliations:**

Departments of <sup>1</sup>Pathology, <sup>2</sup>Neuroscience, <sup>3</sup>Physiology, <sup>4</sup>Ophthalmology and <sup>5</sup>Neurology, Johns Hopkins School of Medicine, Baltimore, MD 21205

\* indicates equal contribution

# indicates corresponding author

# A

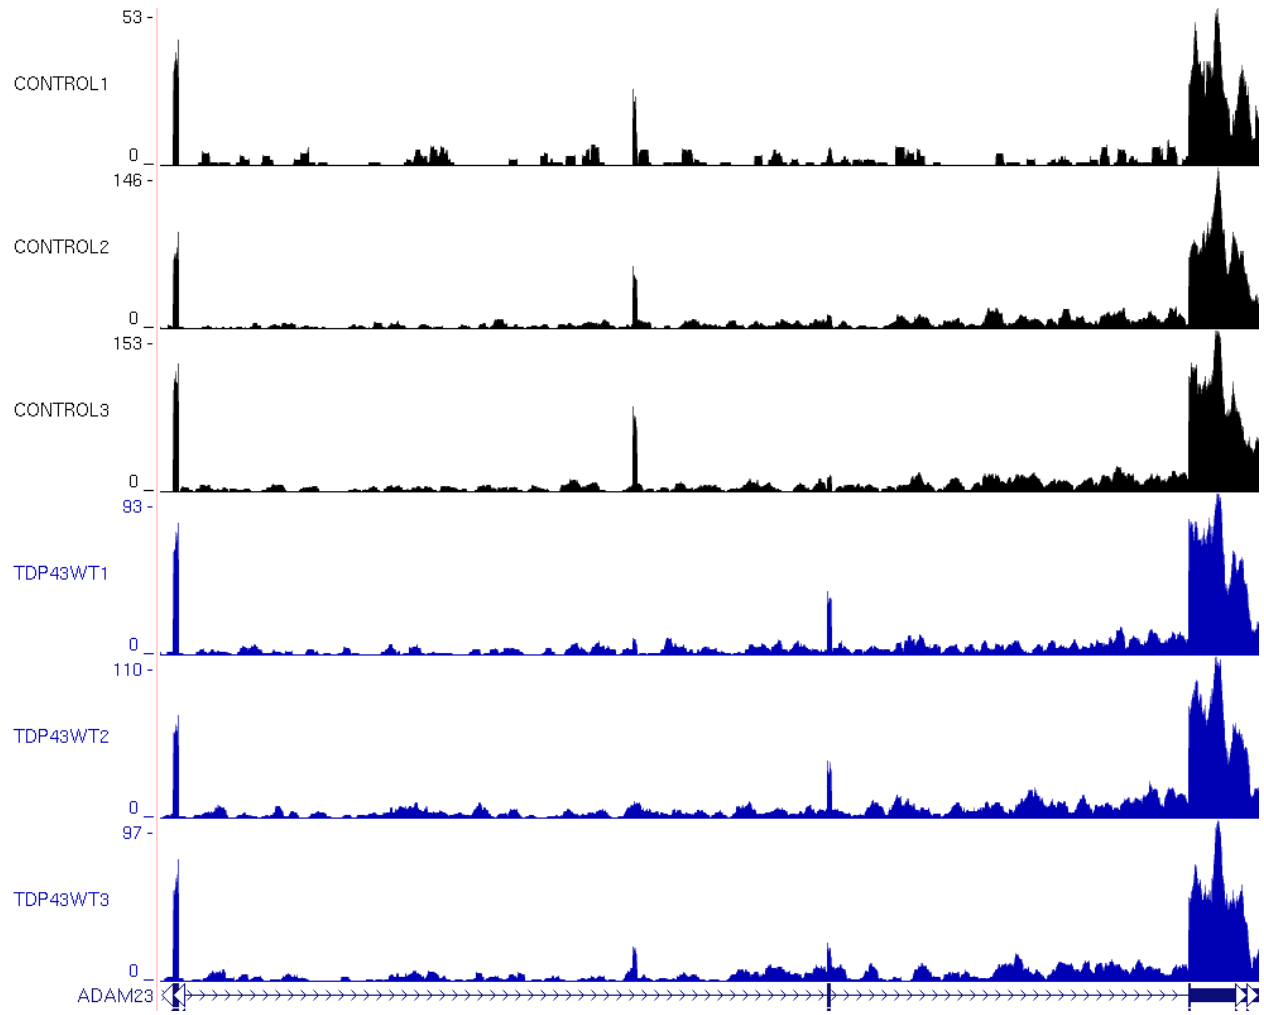

# B

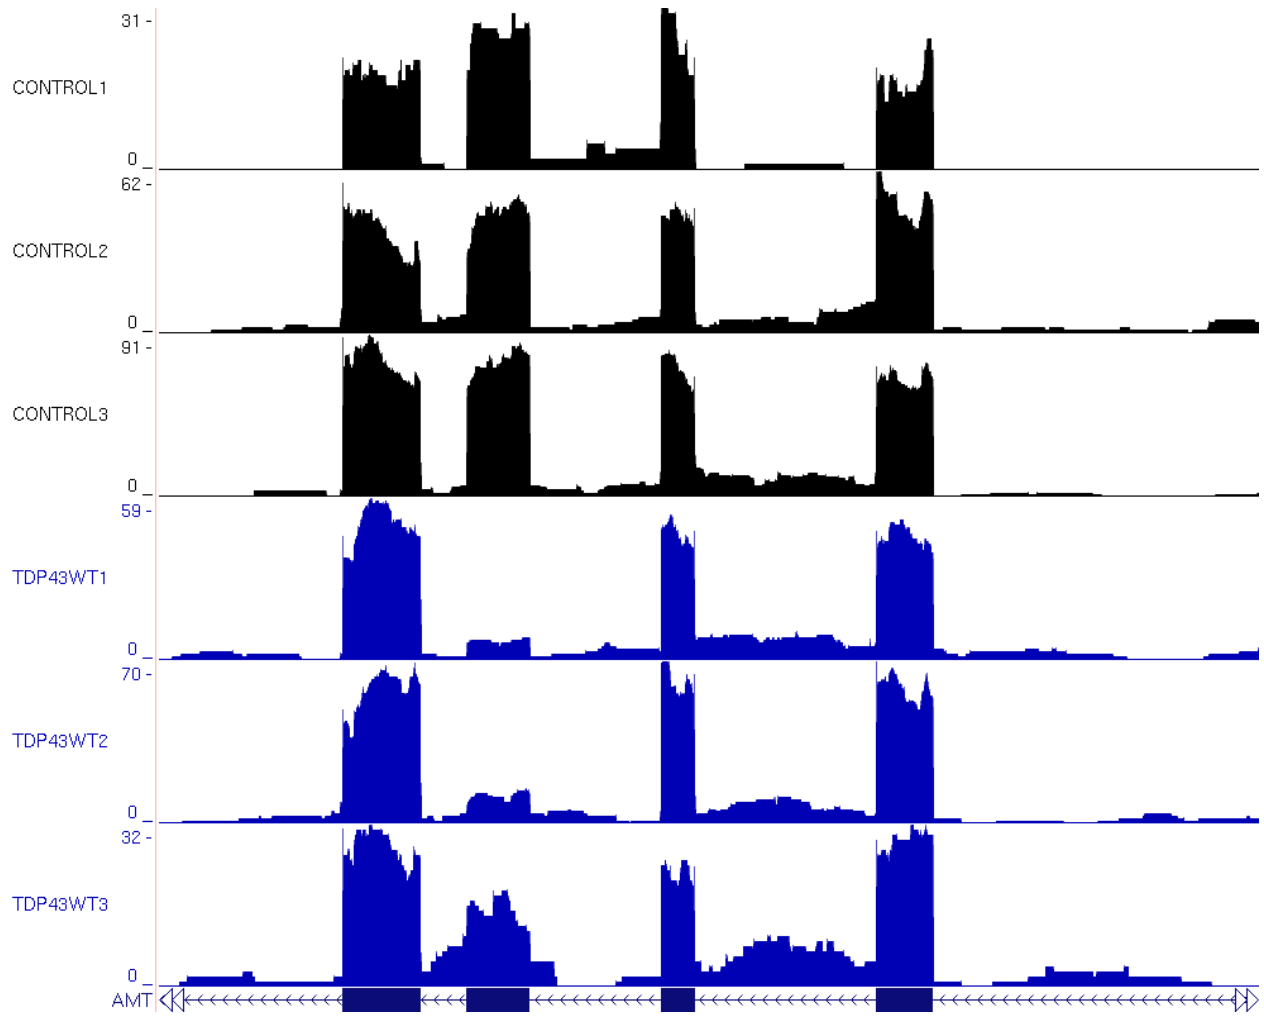

# C

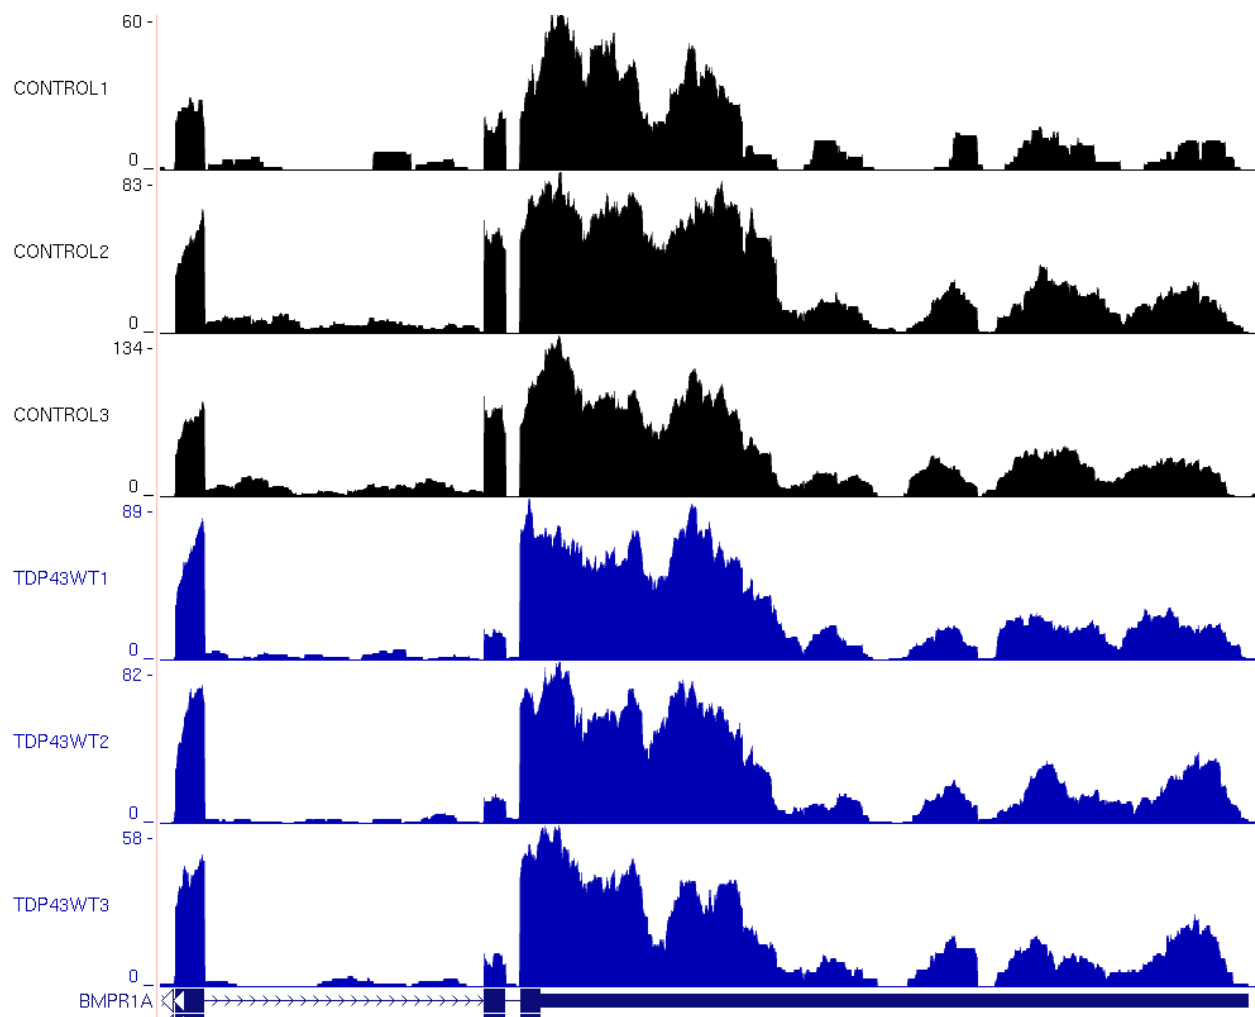

# D

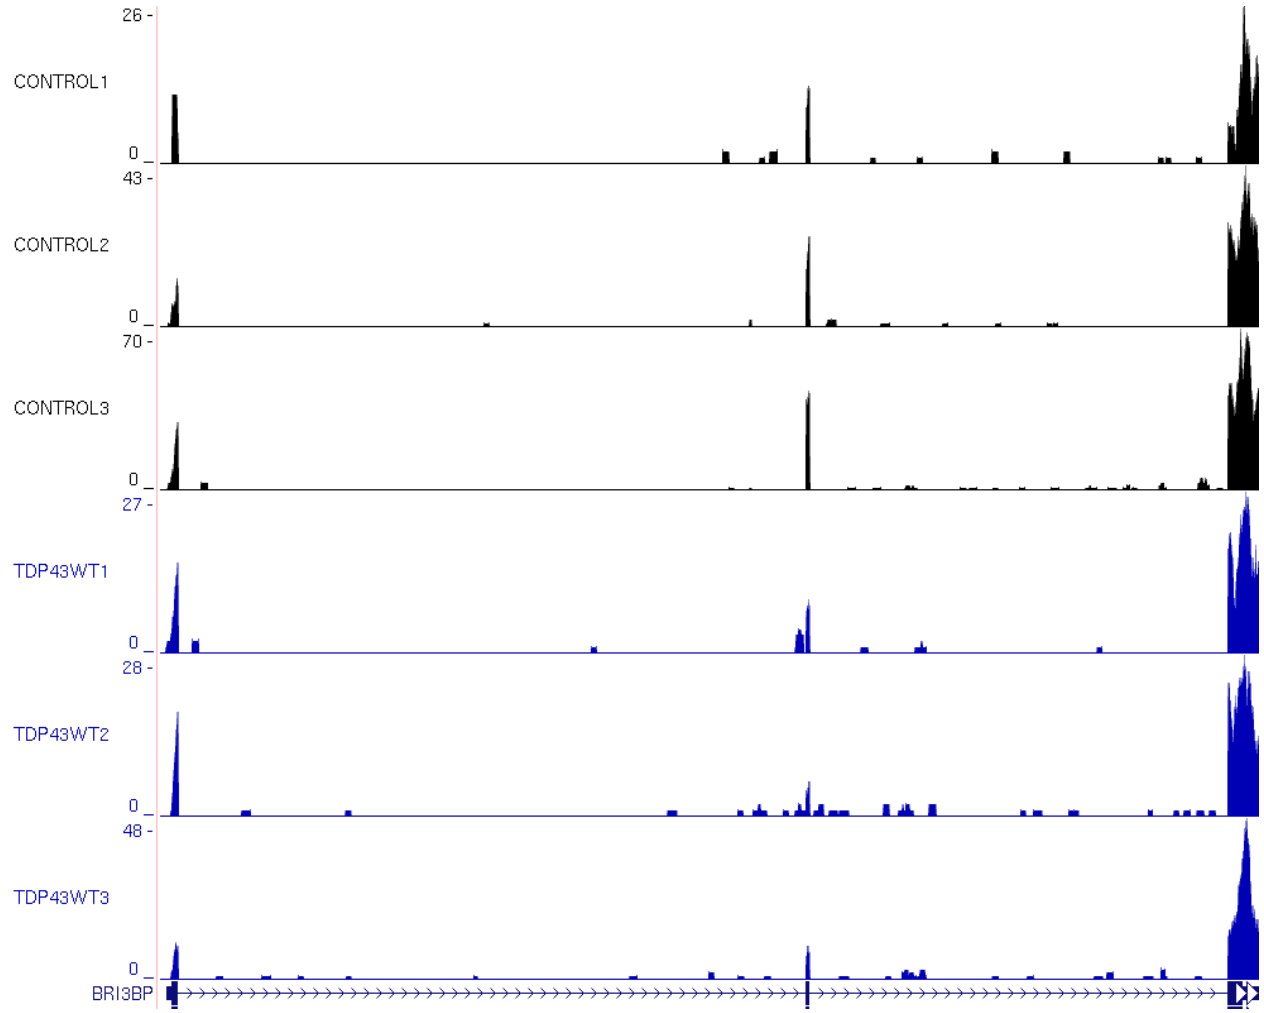

# E

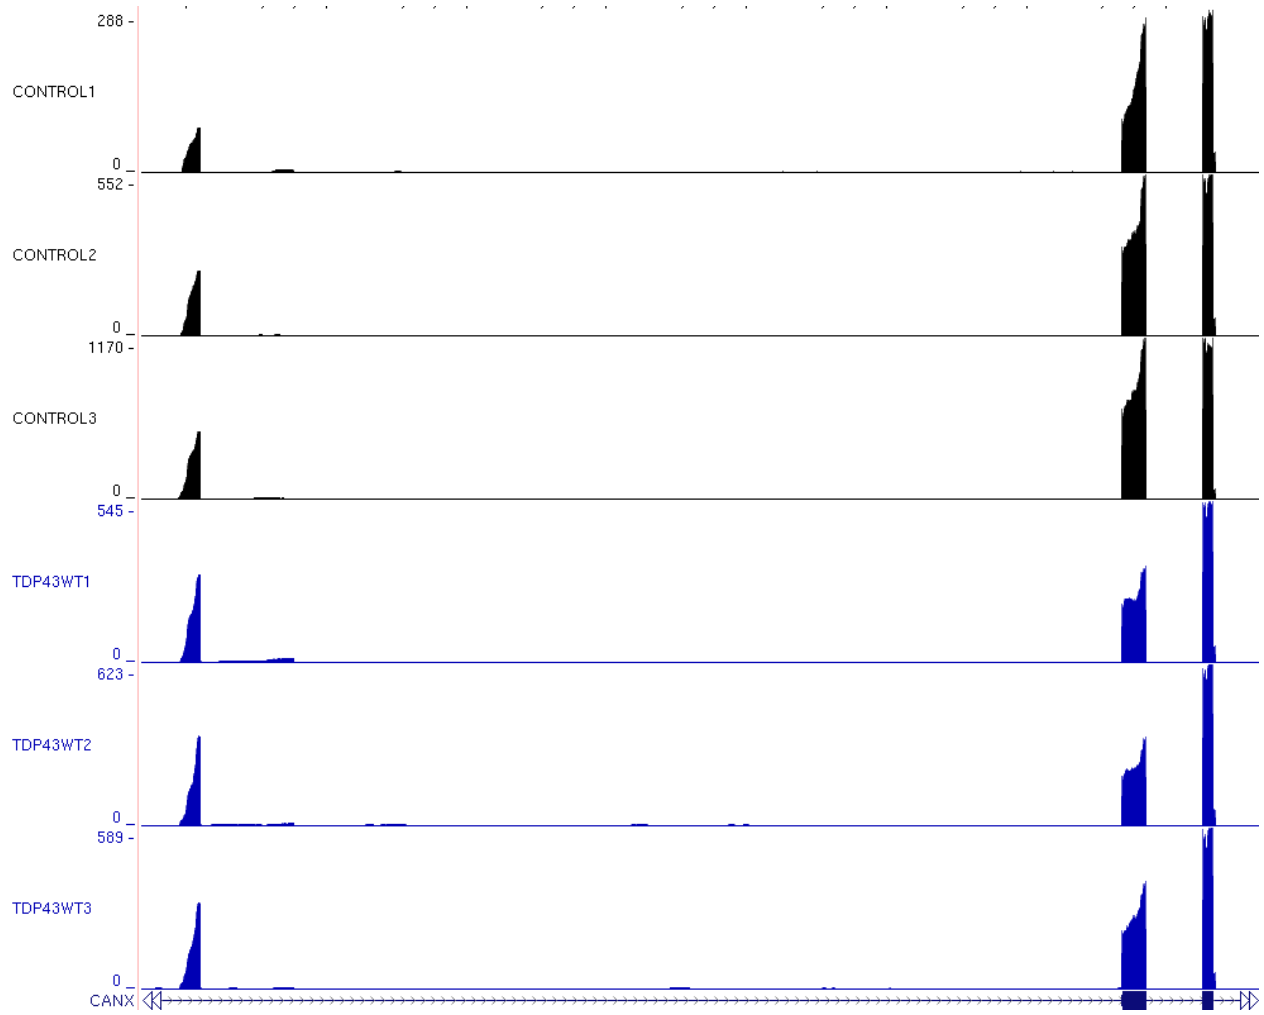

# F

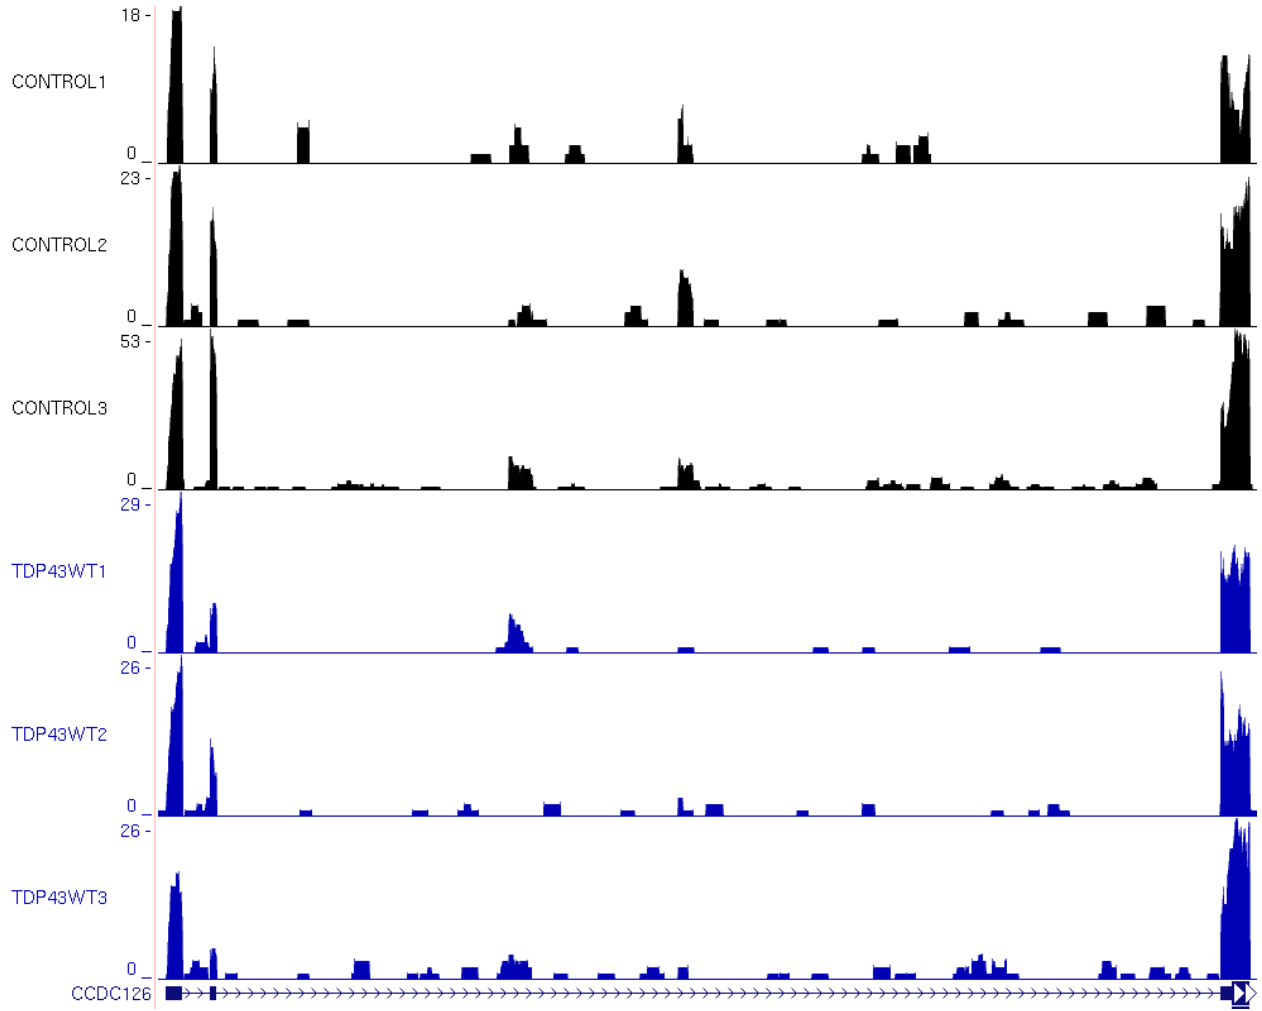

# G

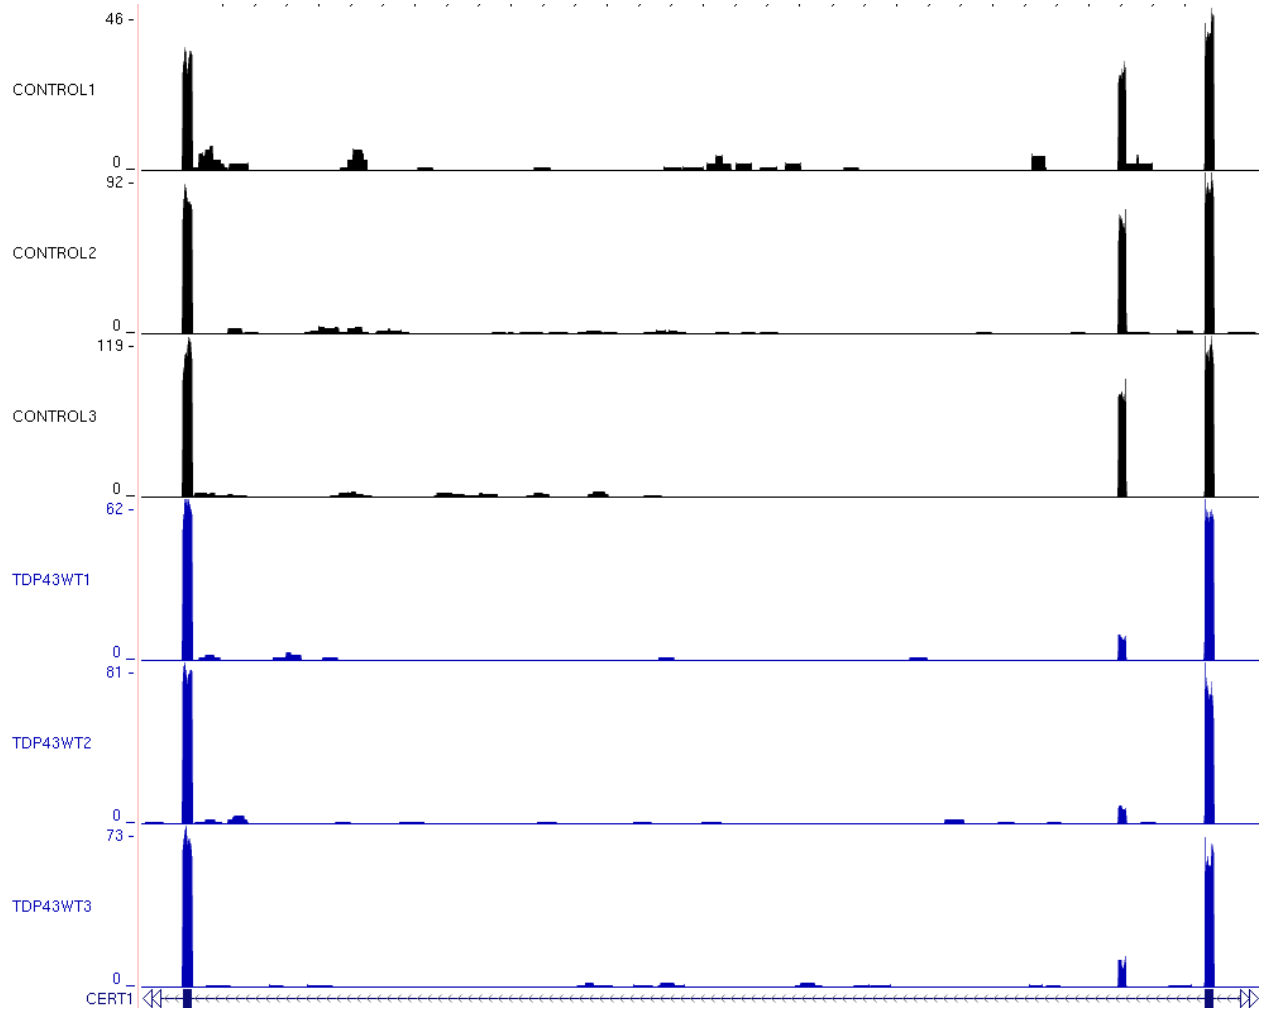



# H

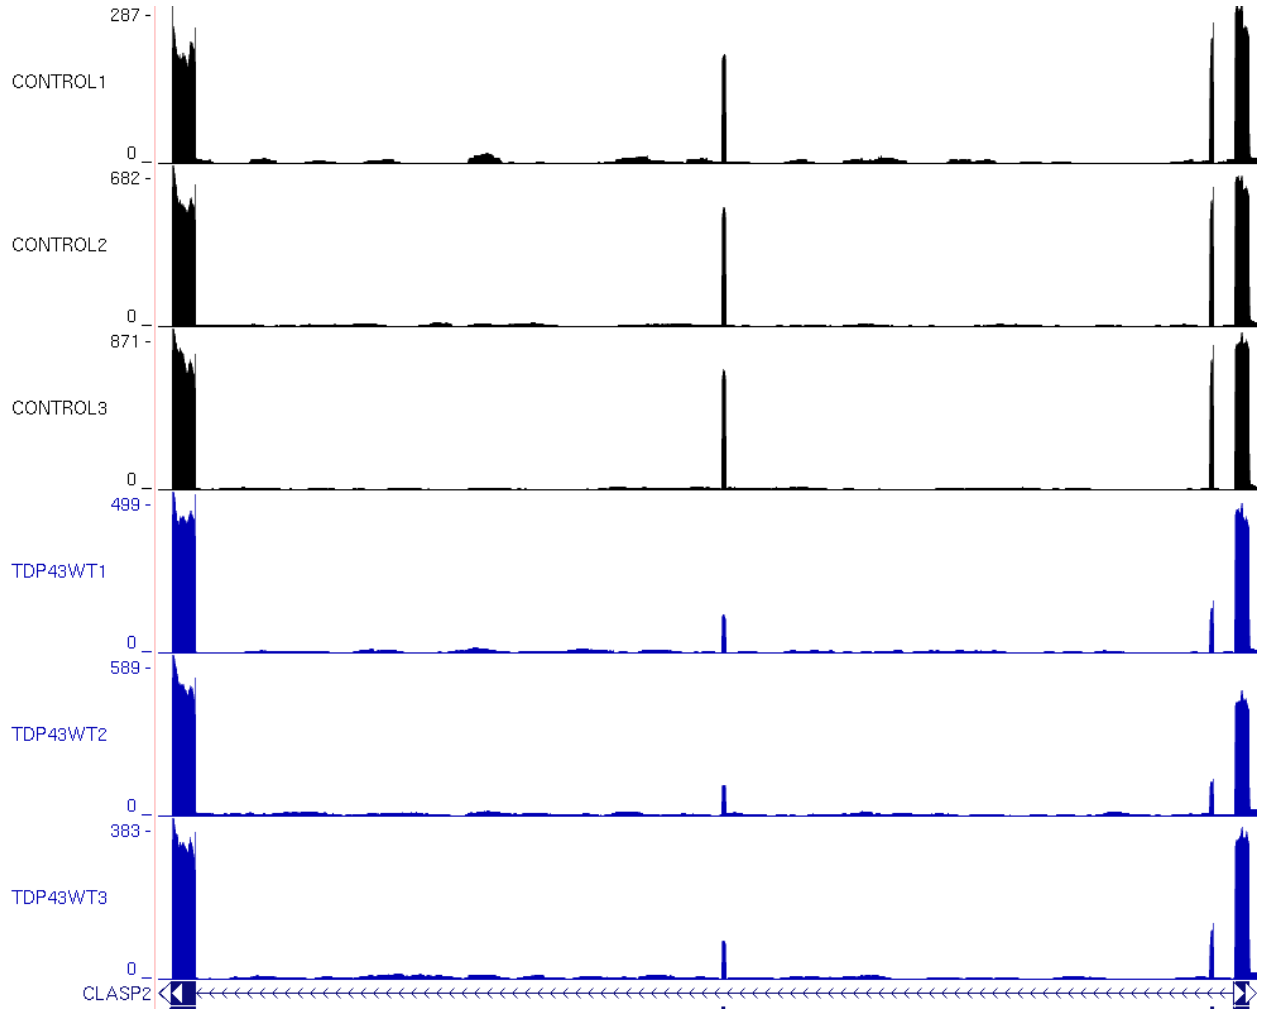

I

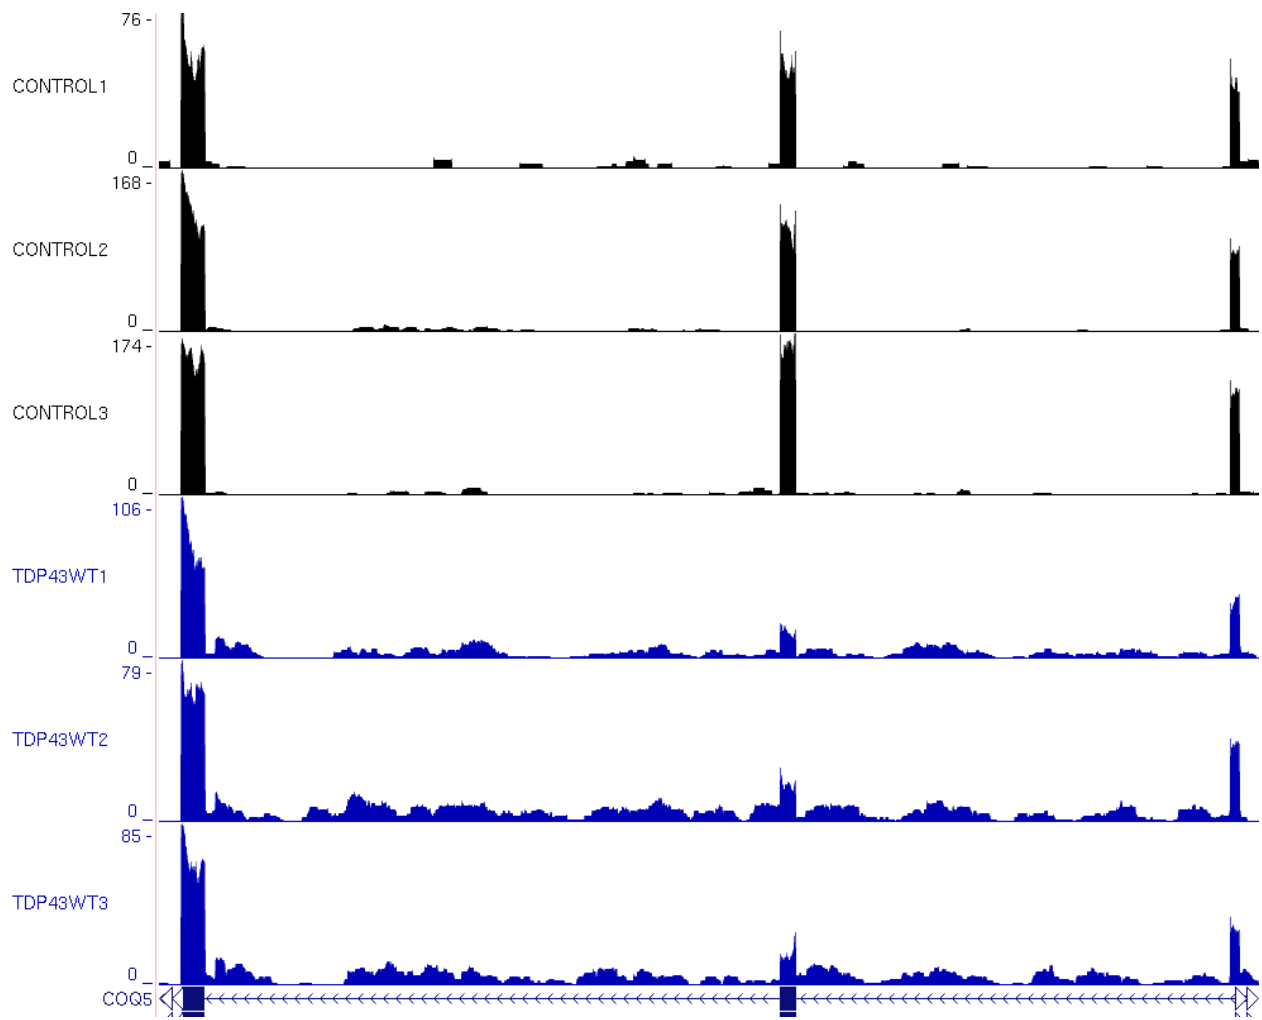

# J

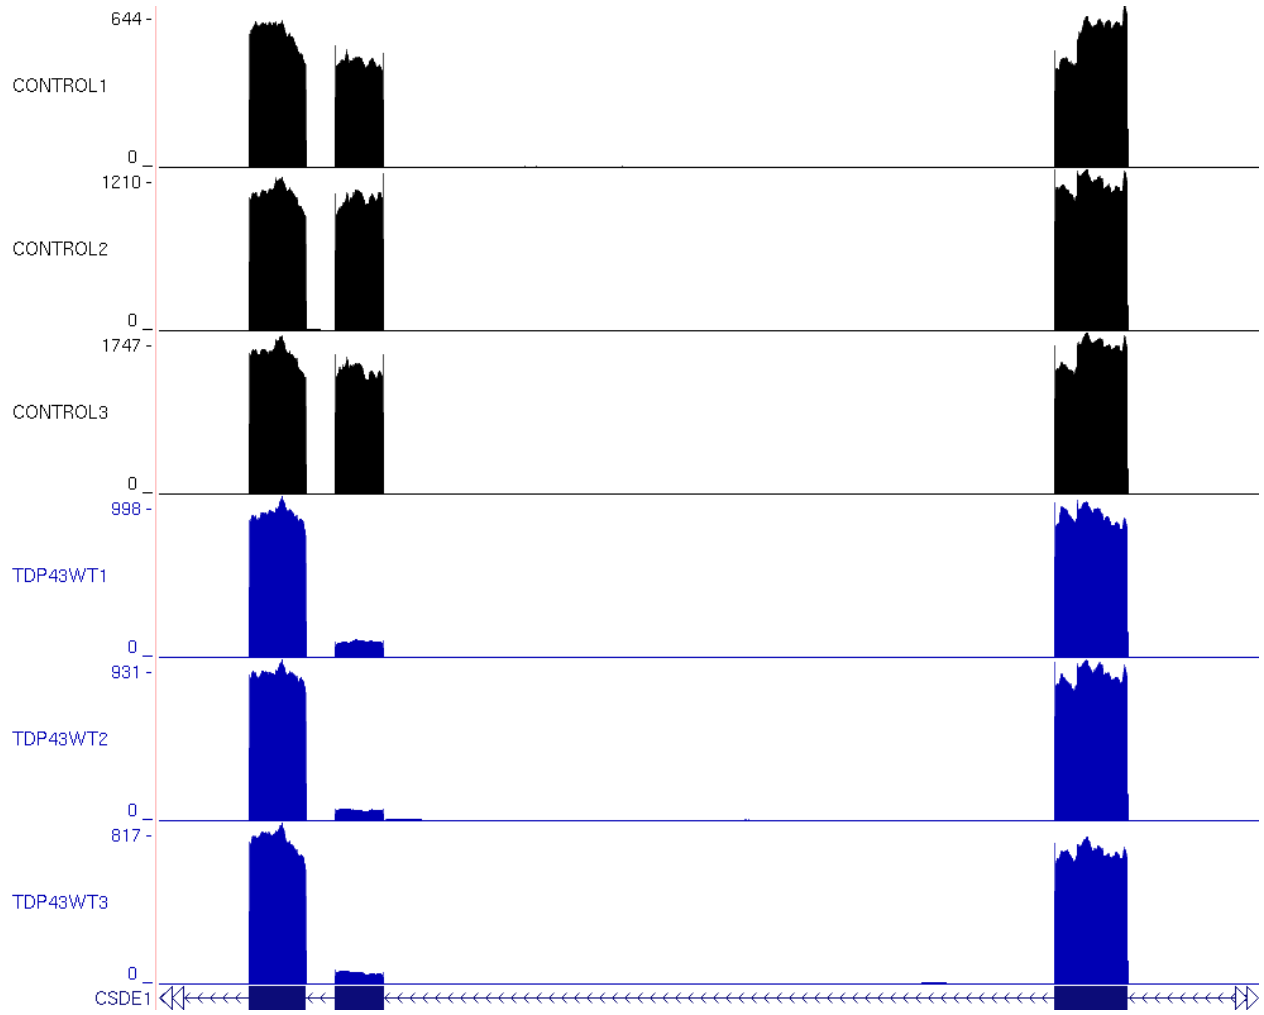

# K

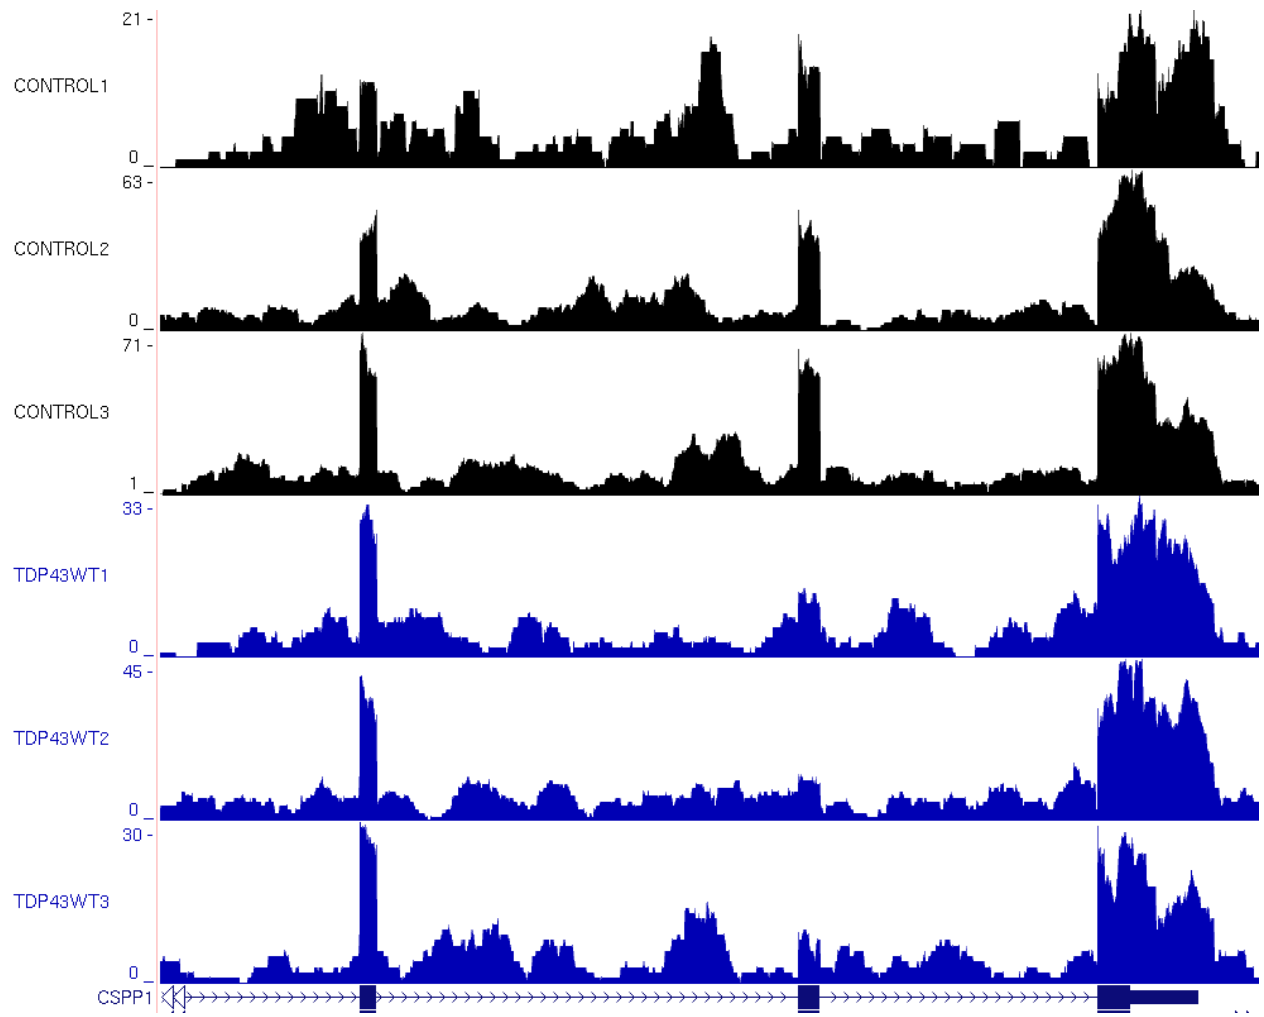

L

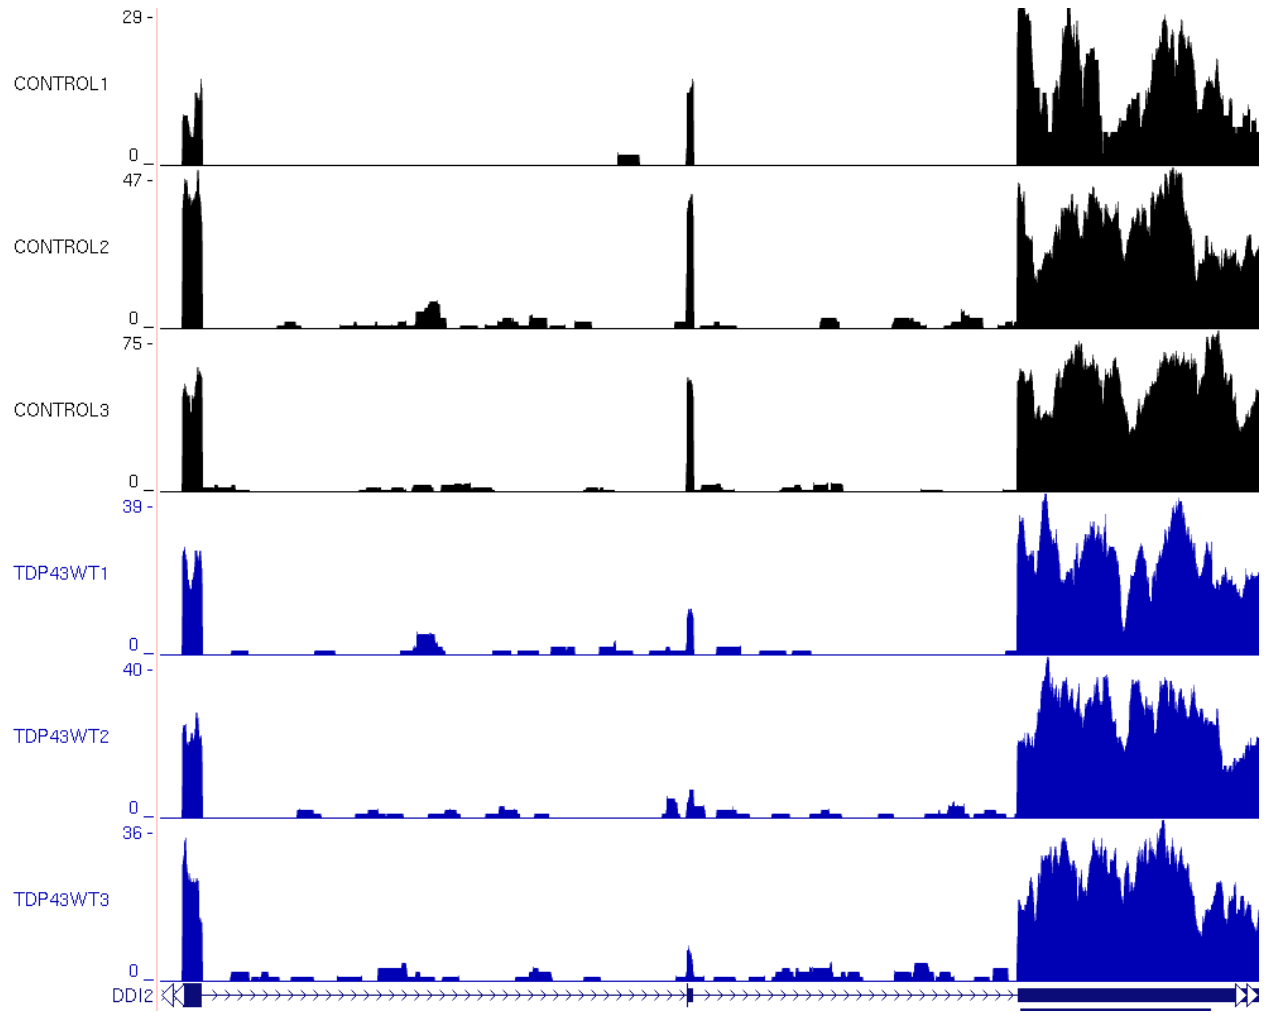

# M

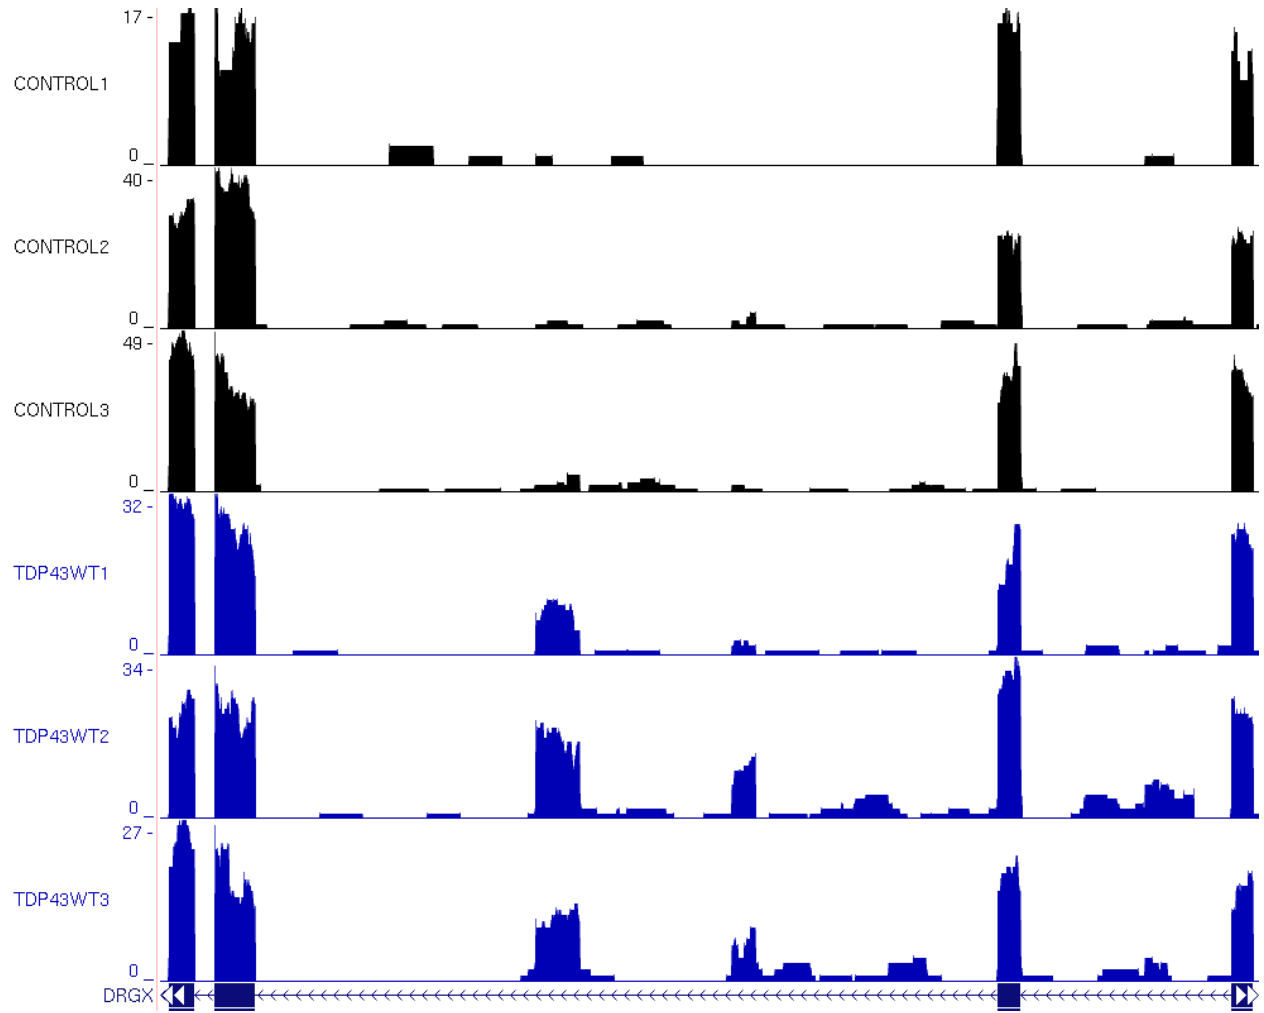

# N

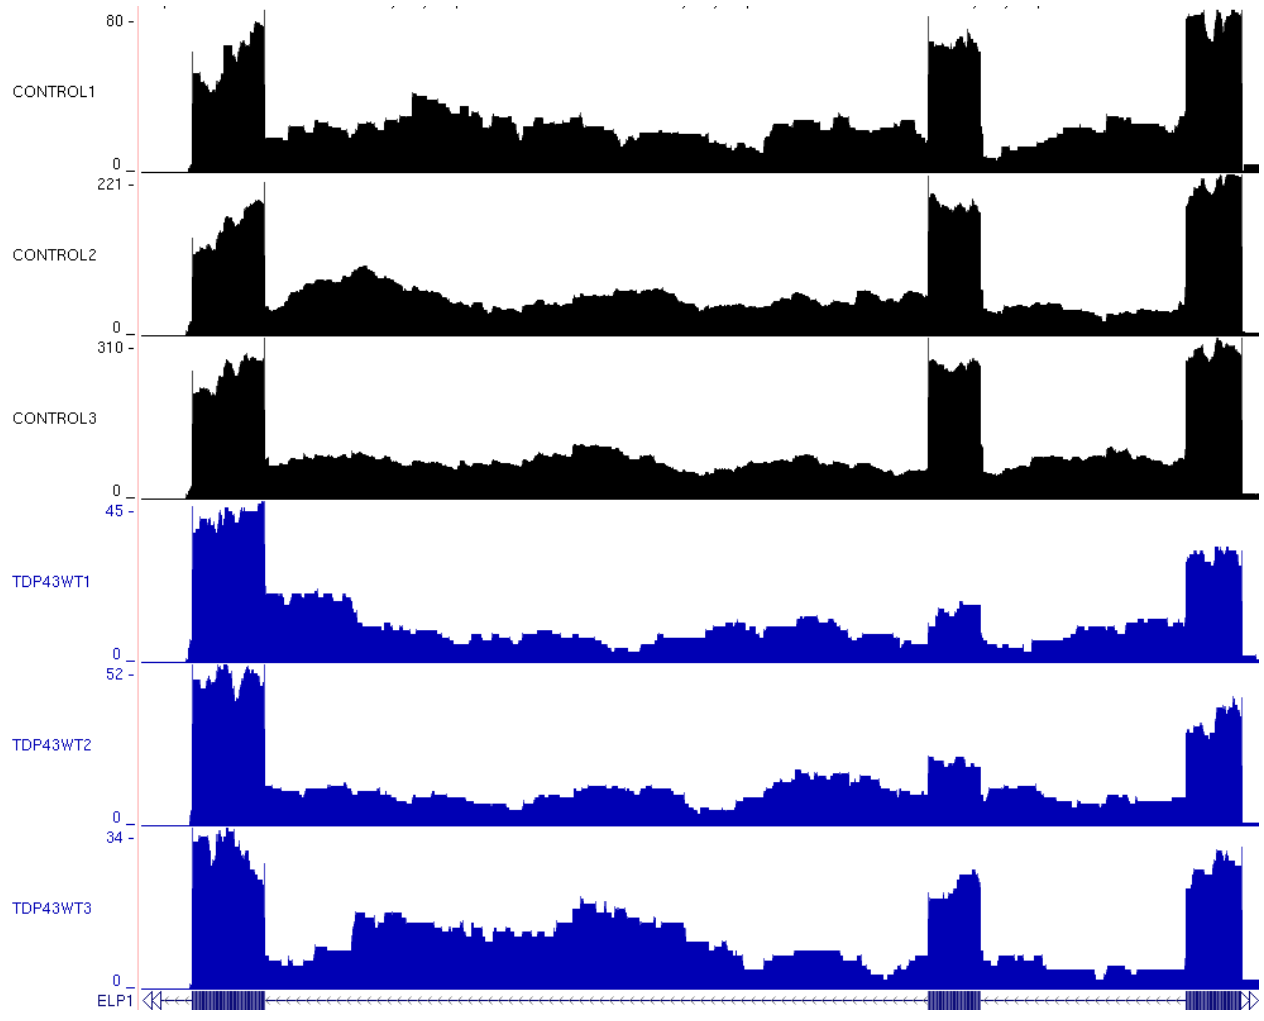

O

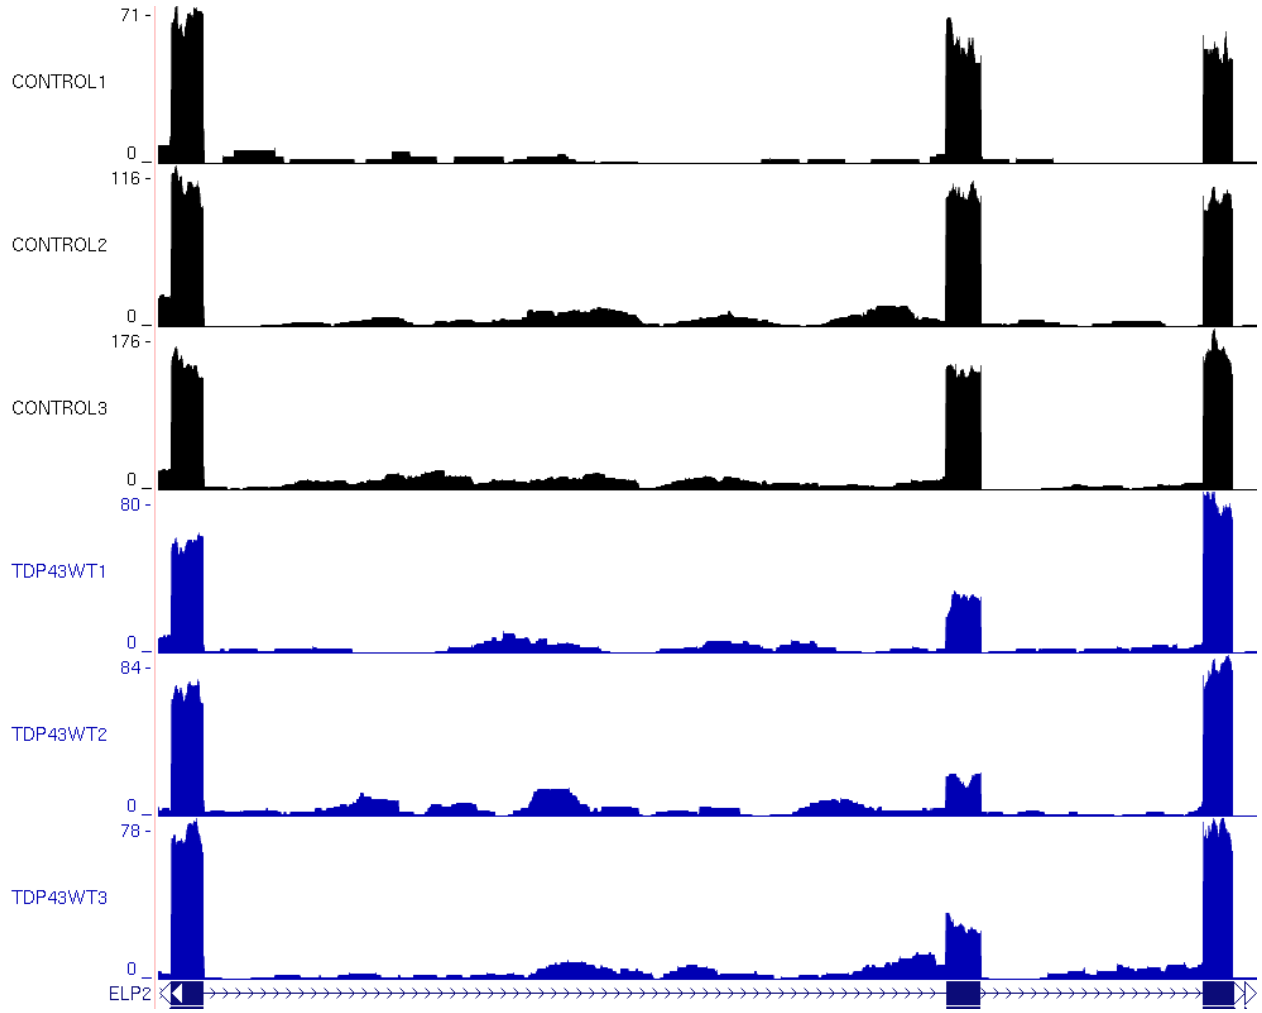



# P

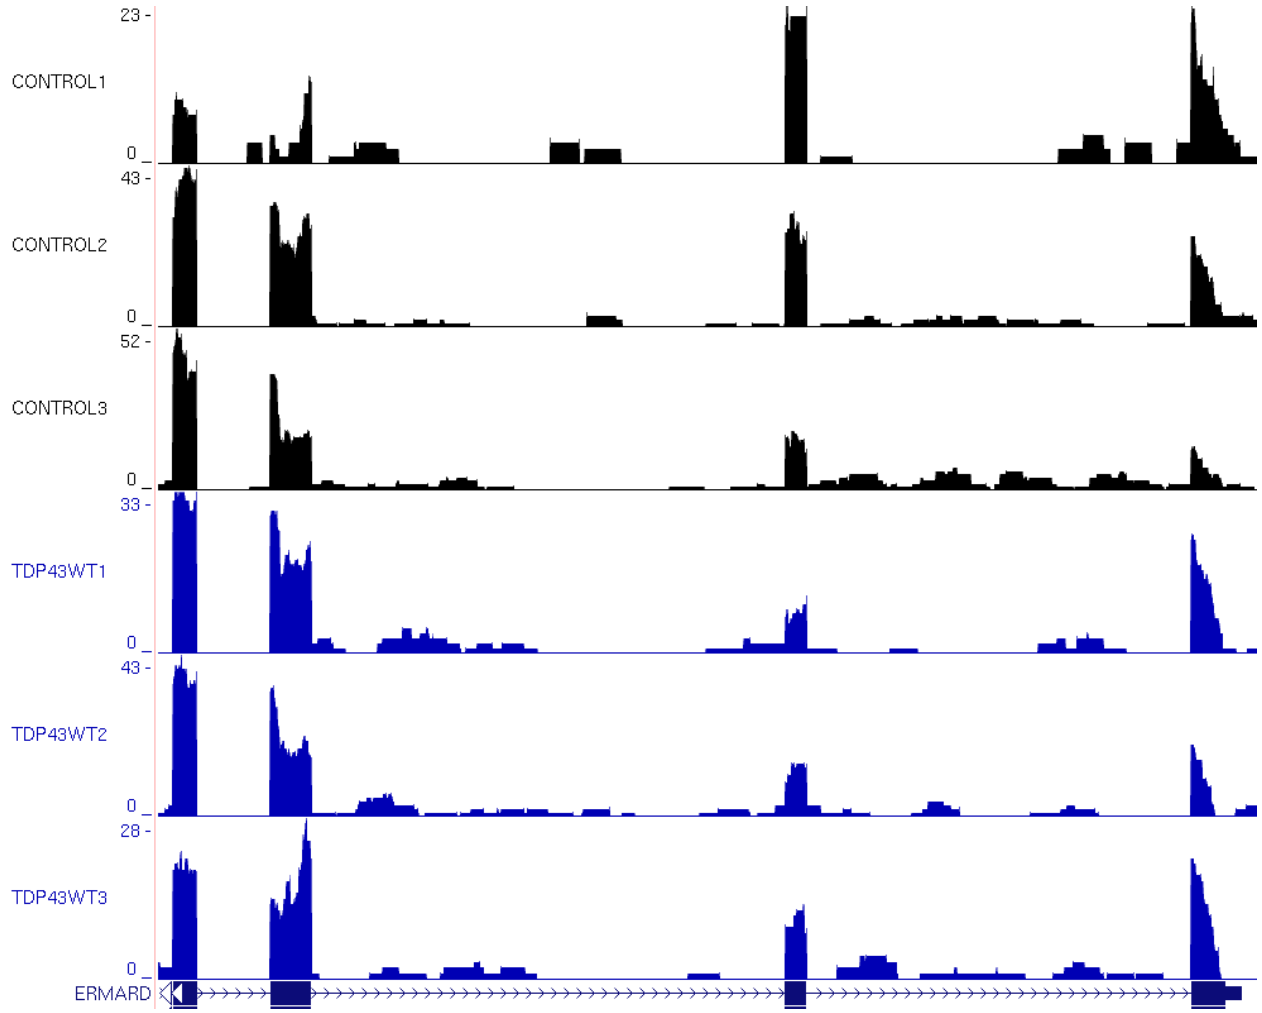

# Q

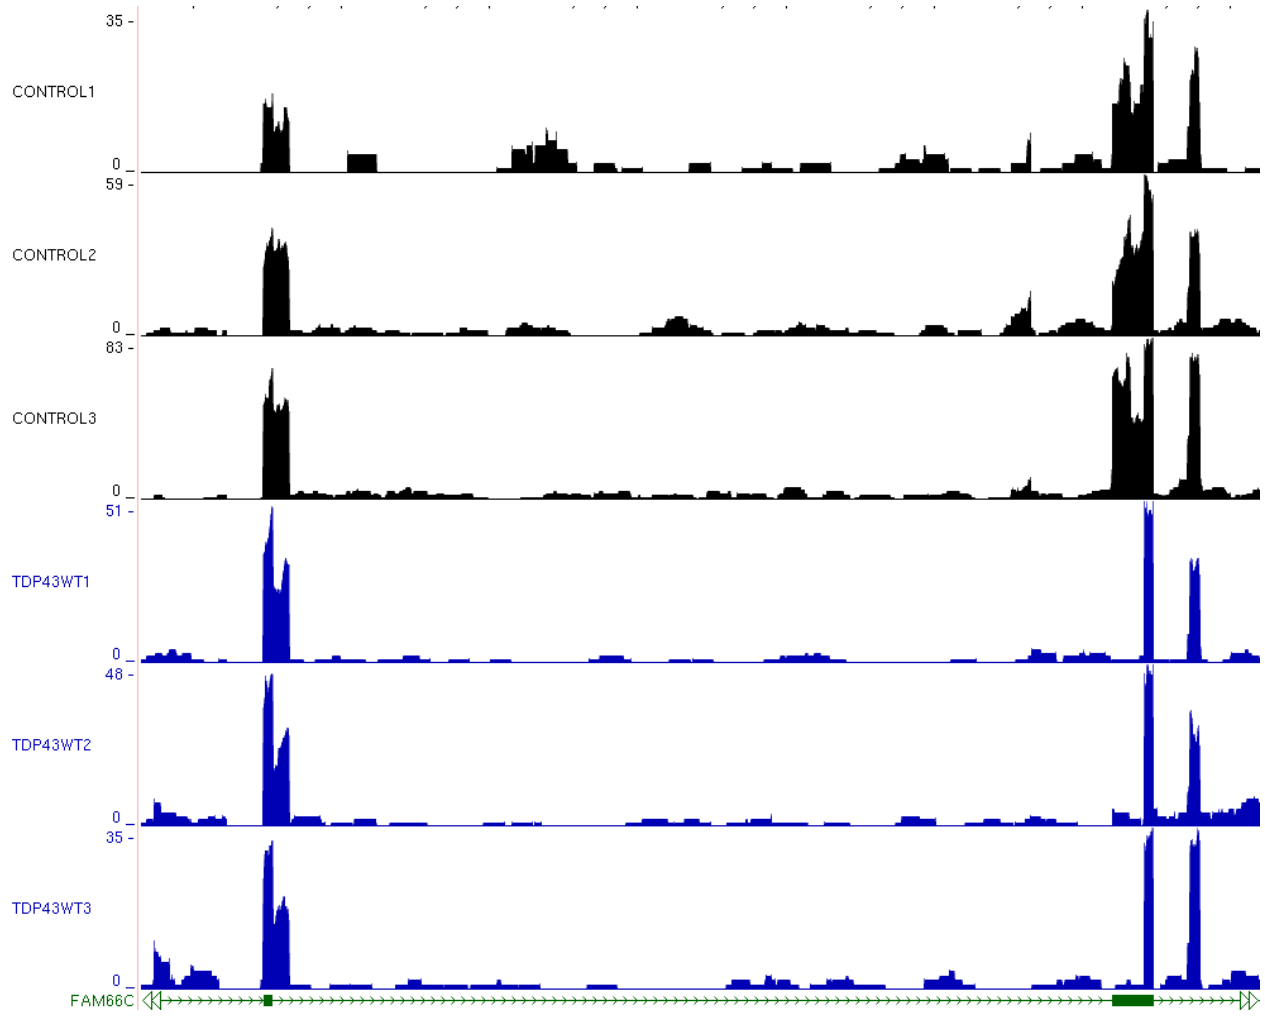

# R

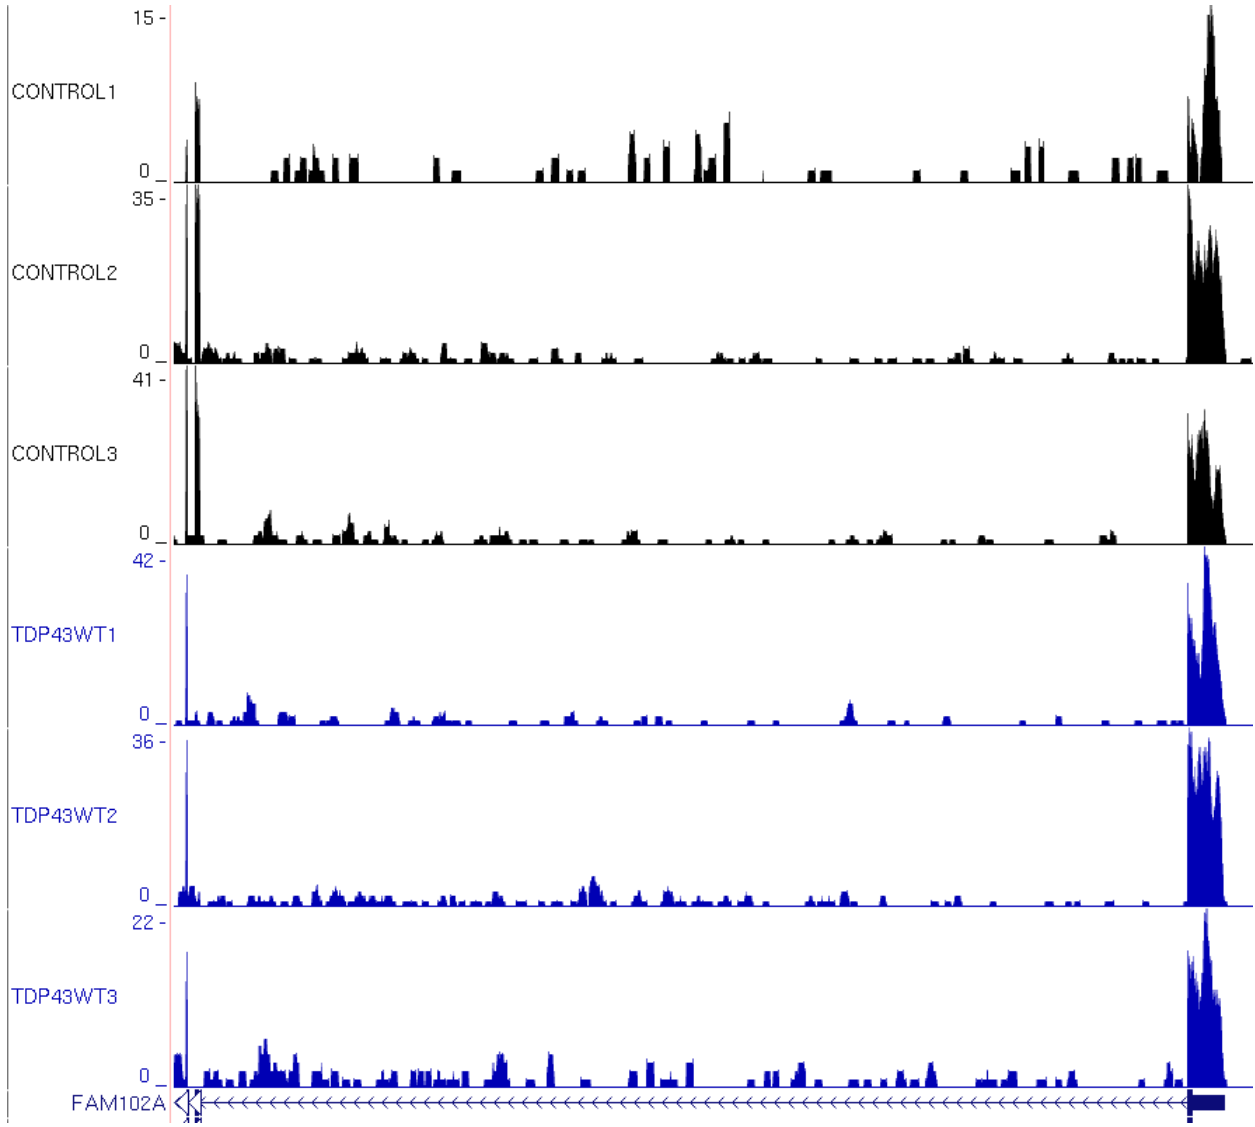

# S

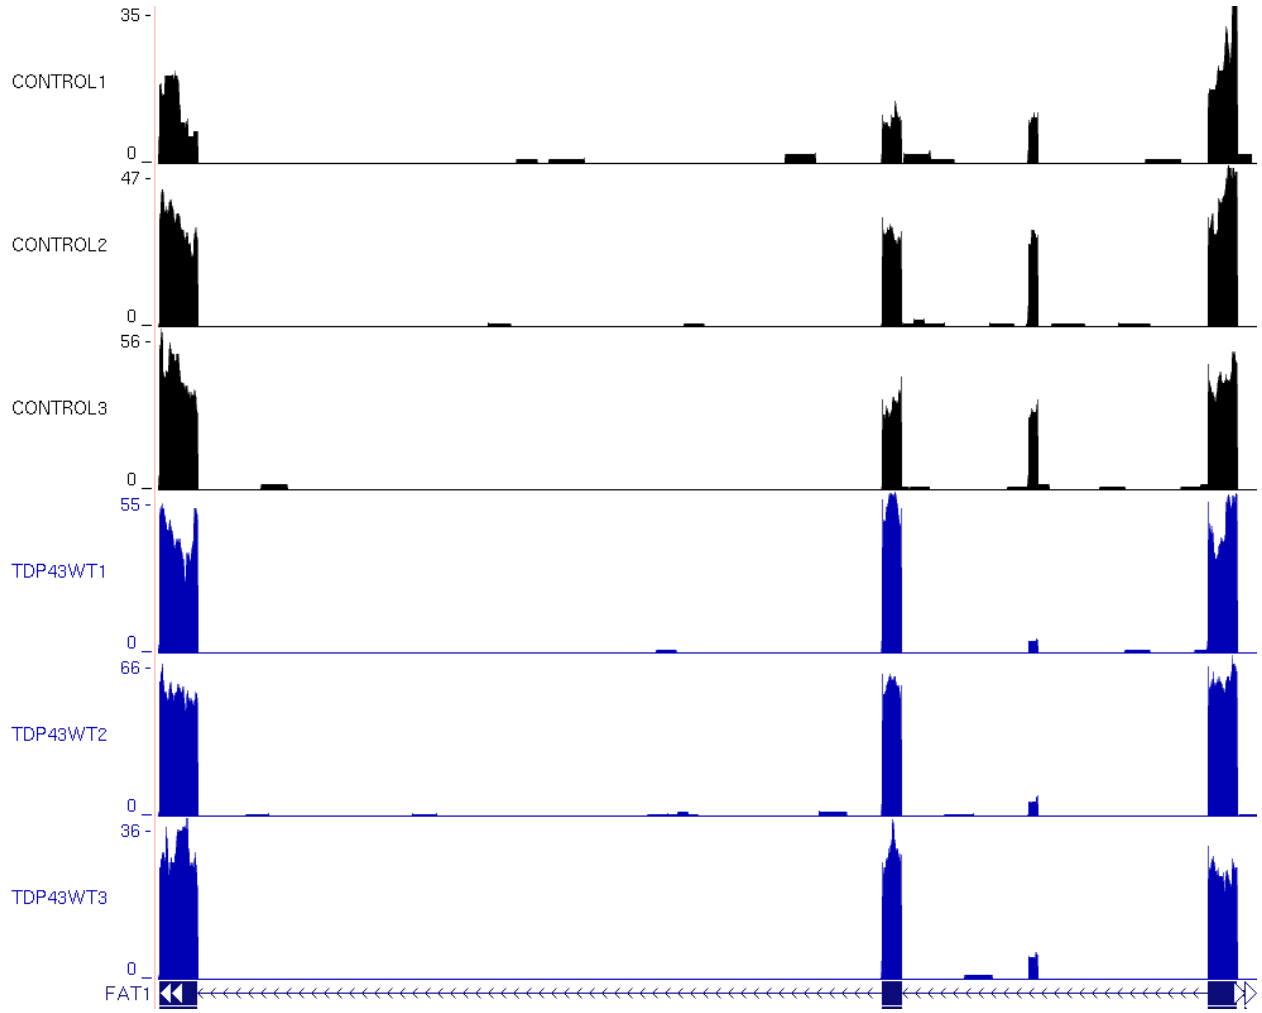

# T

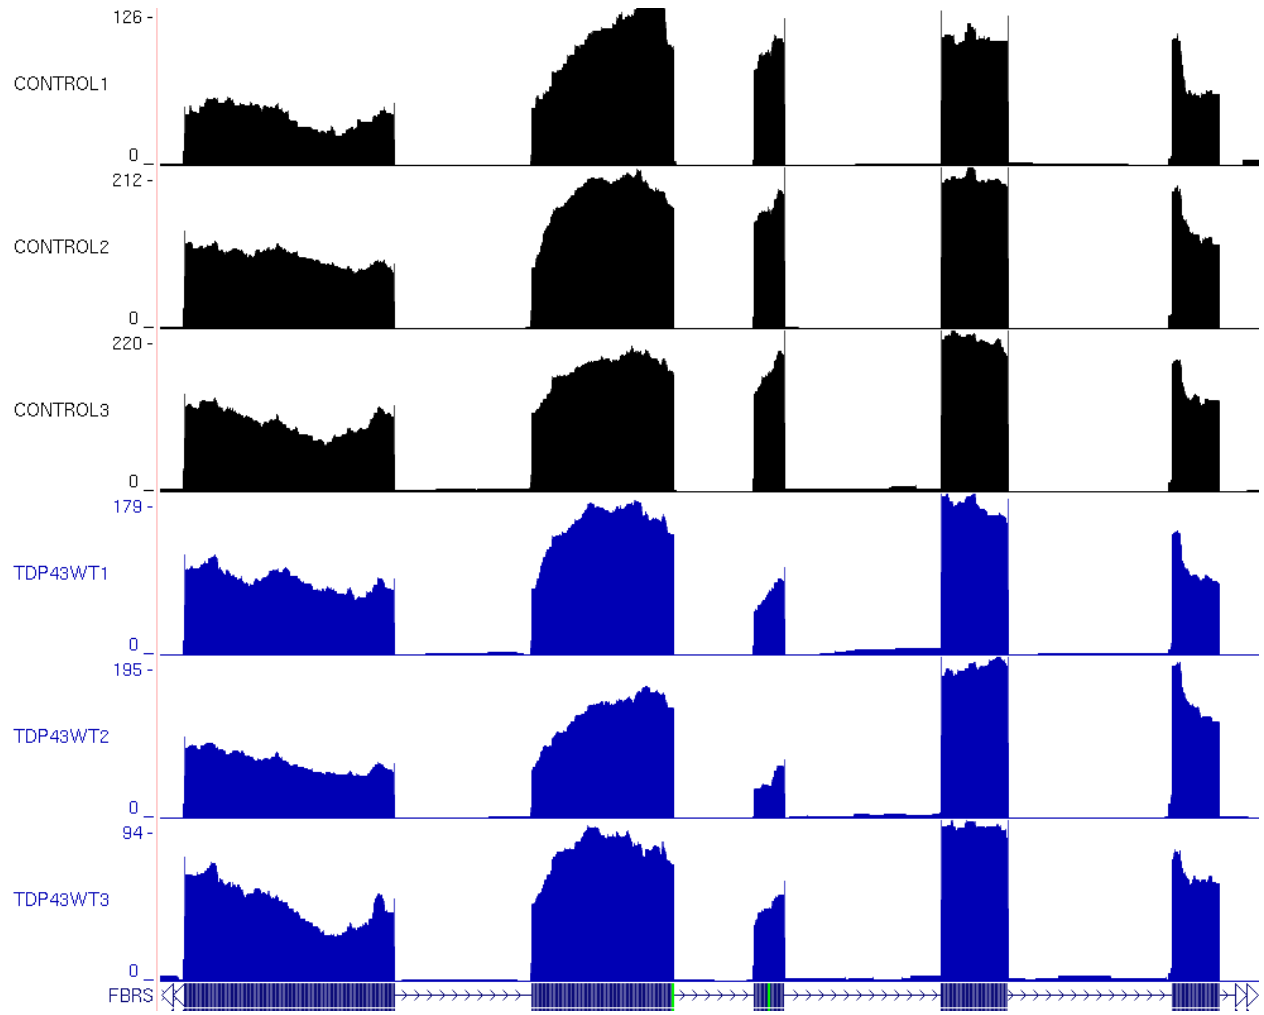

# U

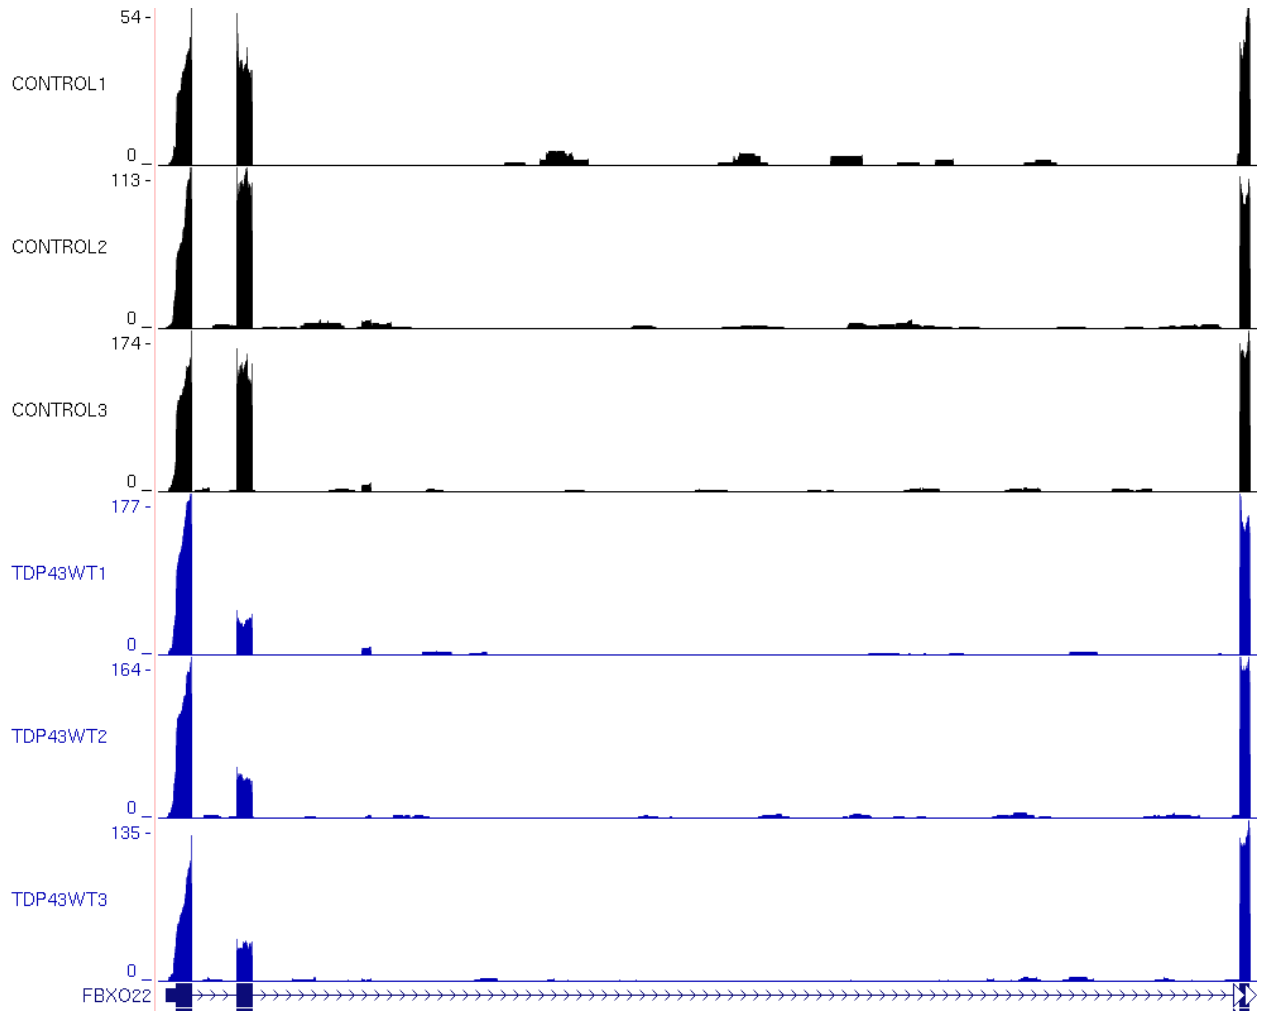

V

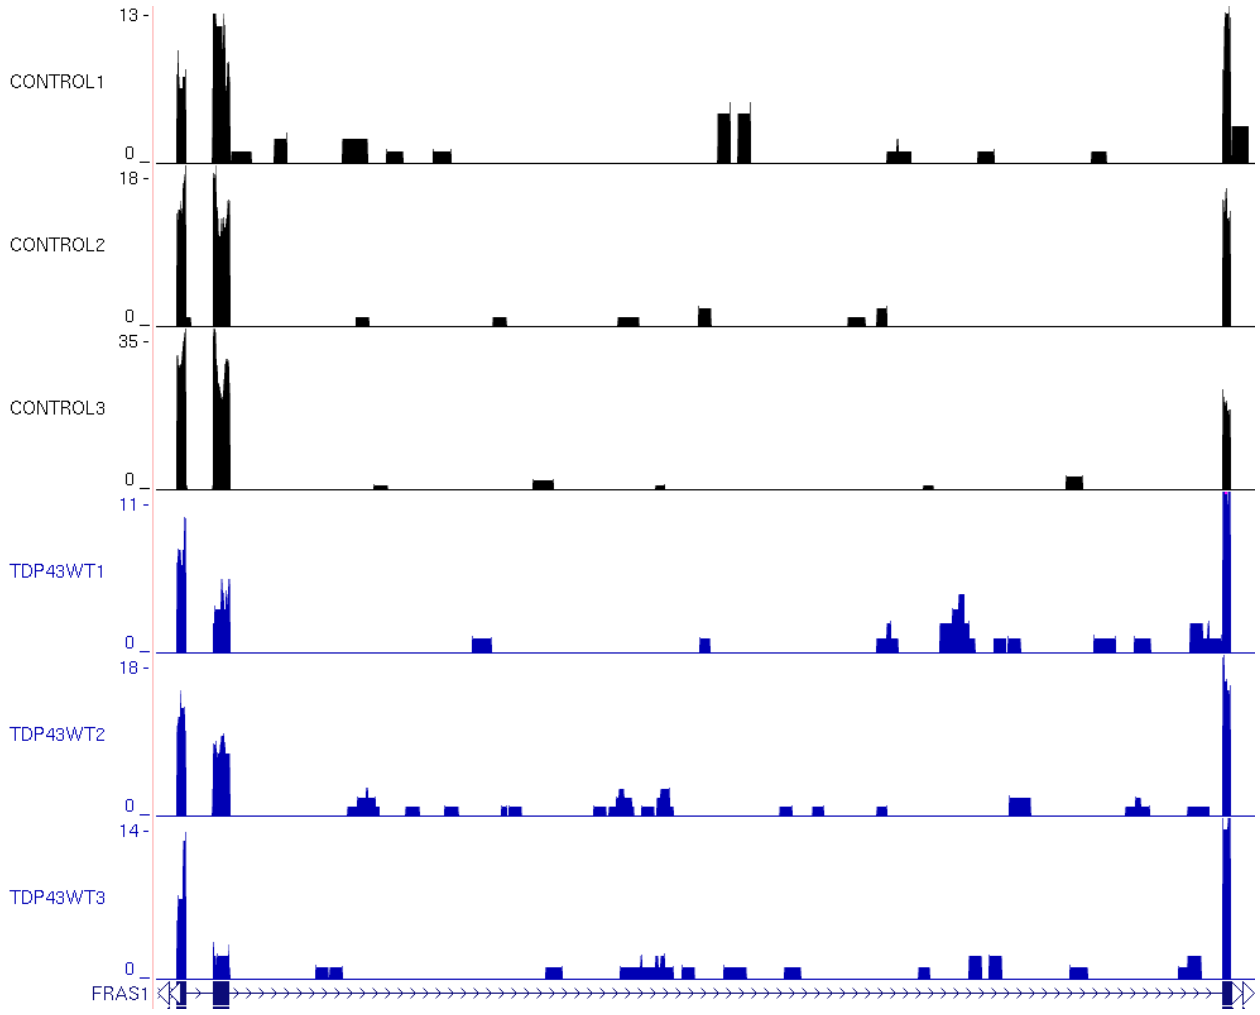

# W

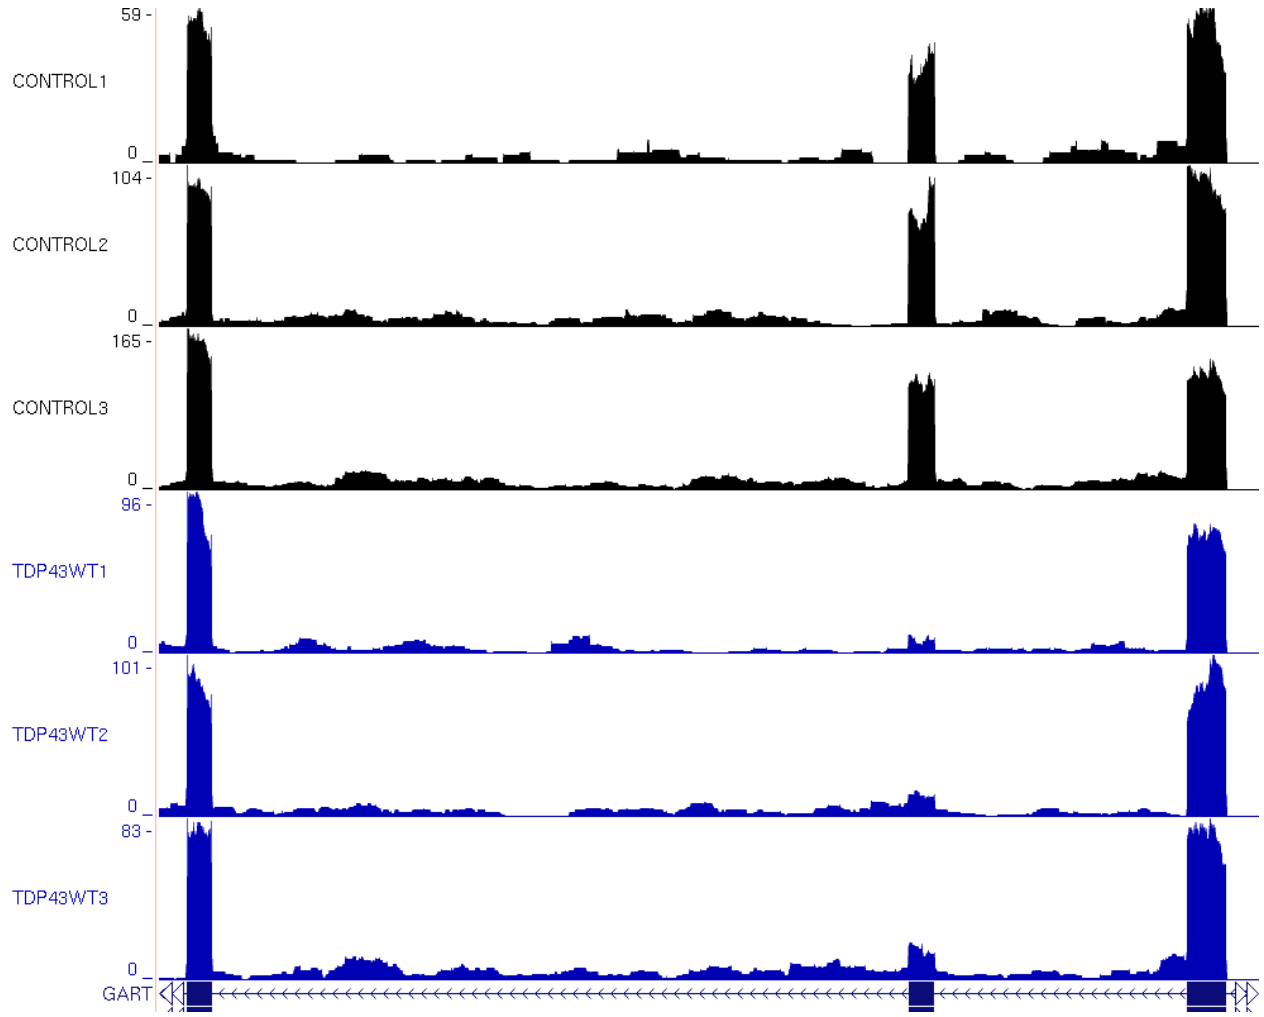



X

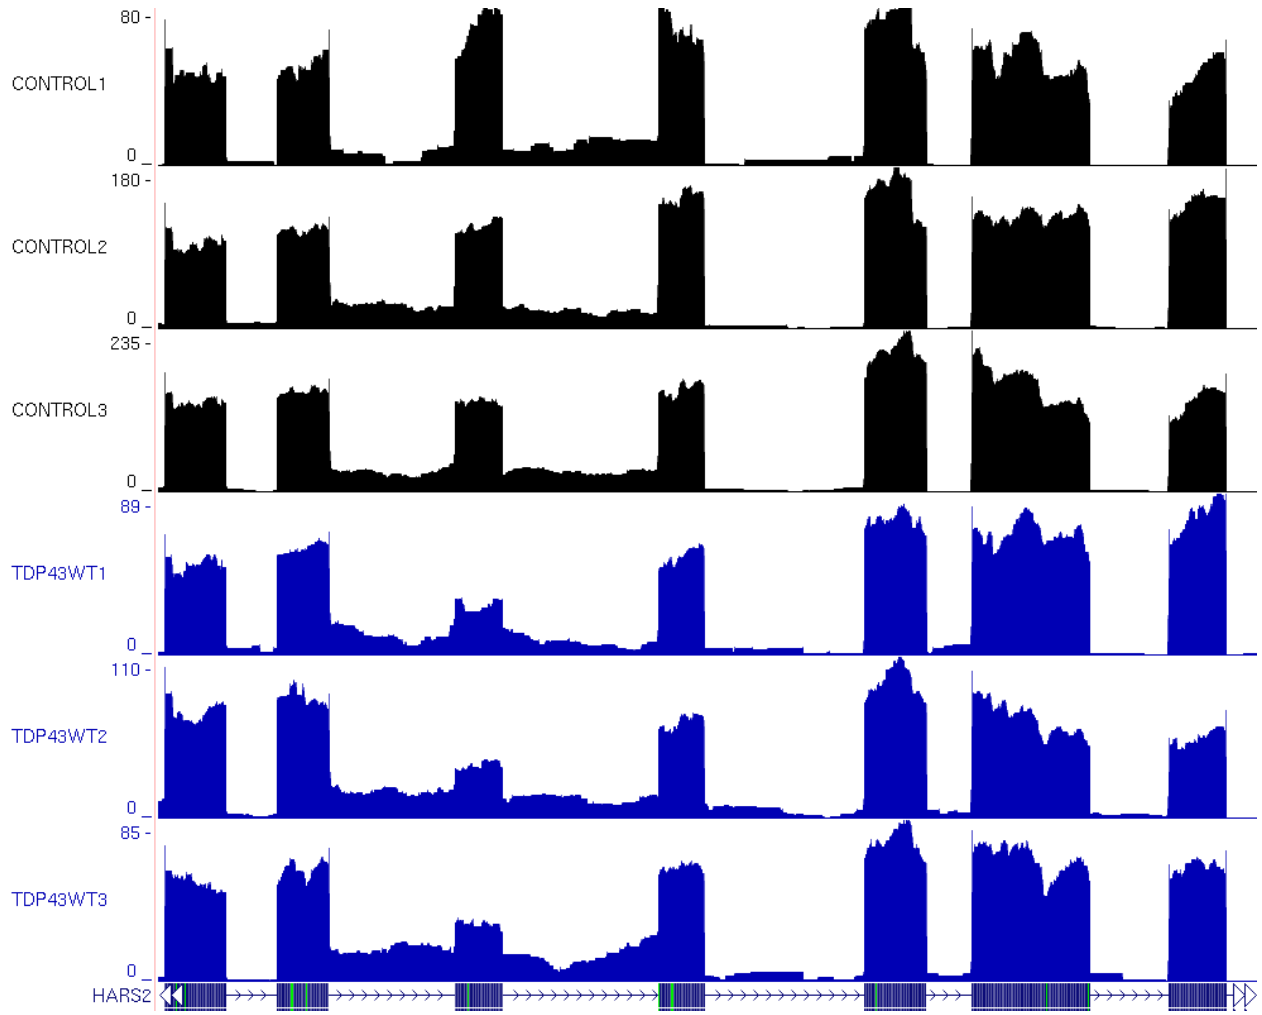

Y

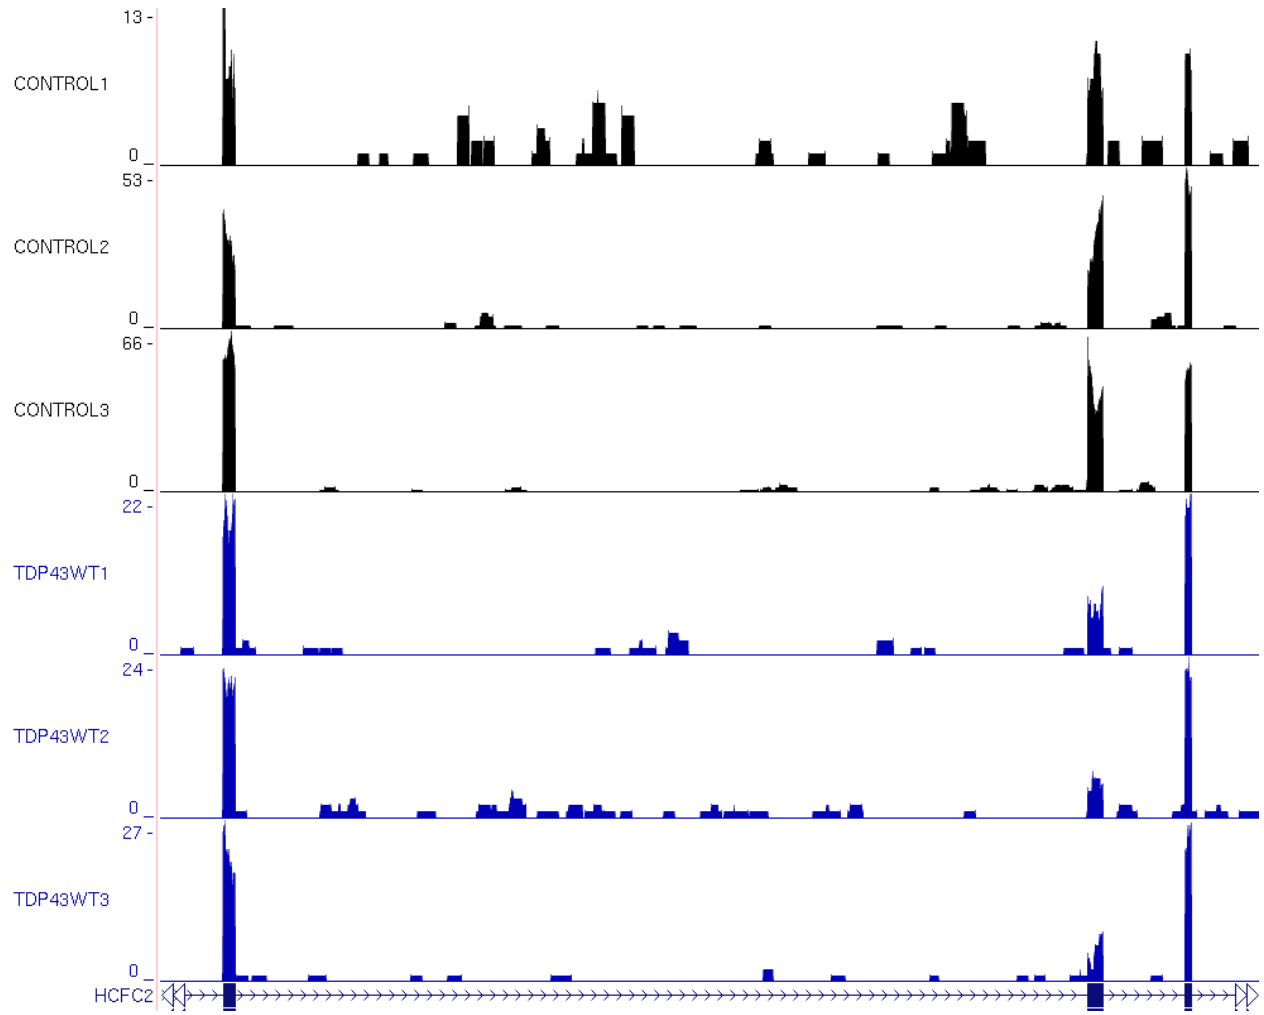

# Z

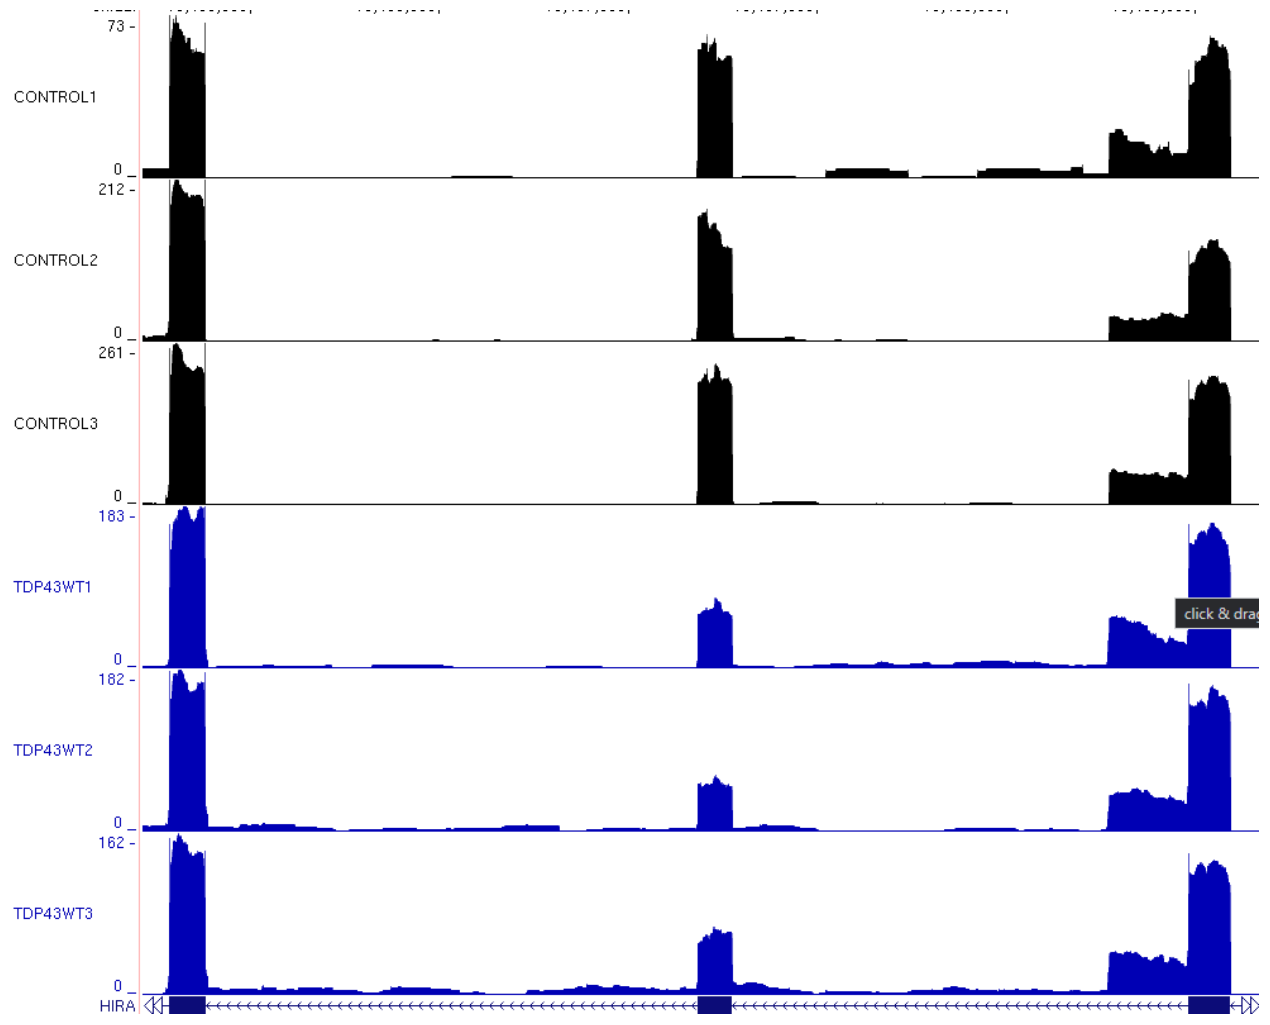

# AA

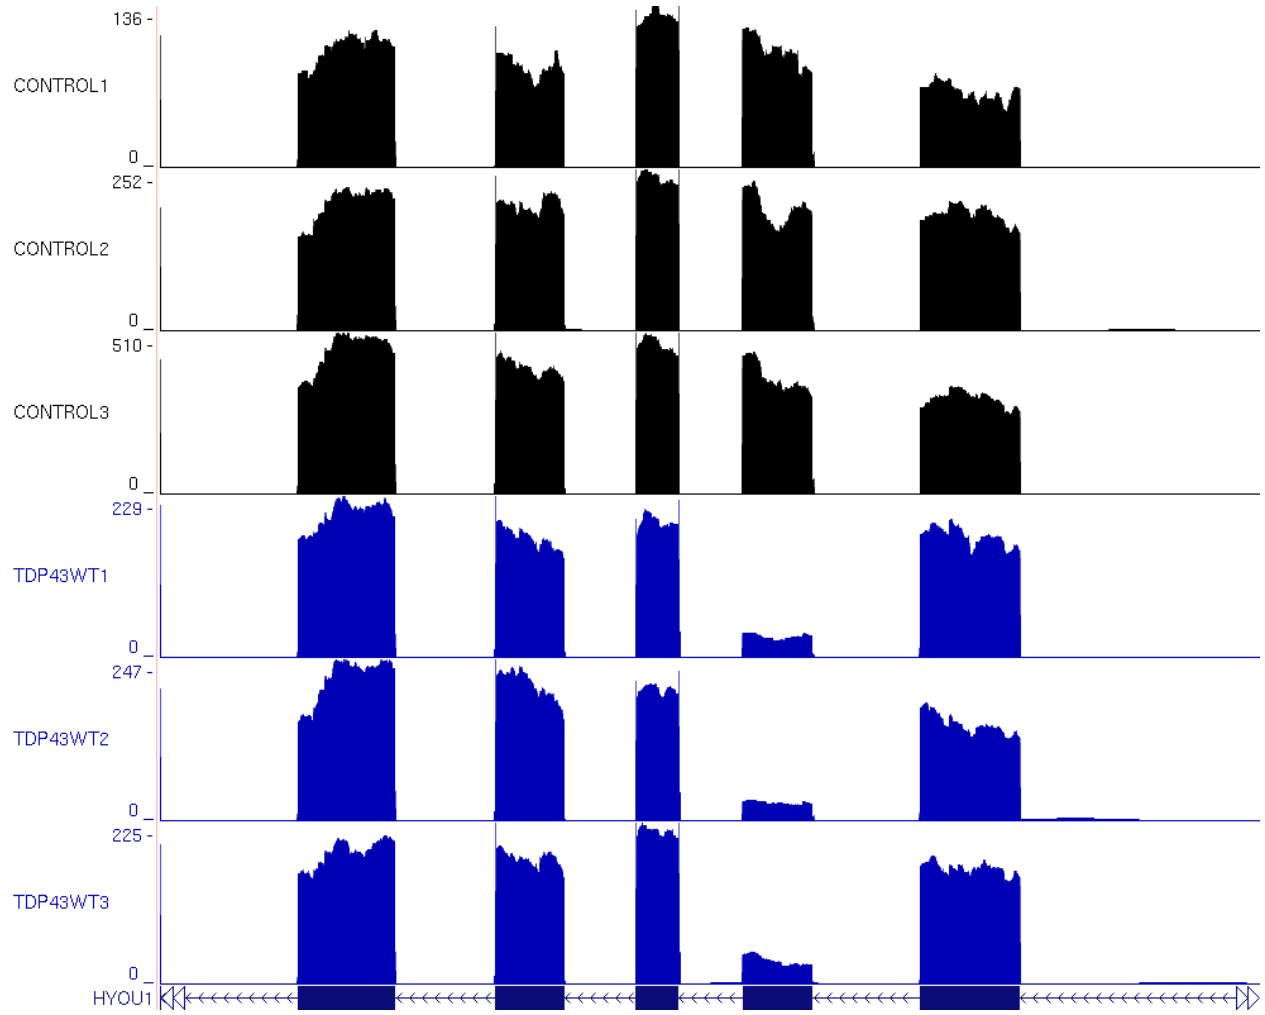

# AB

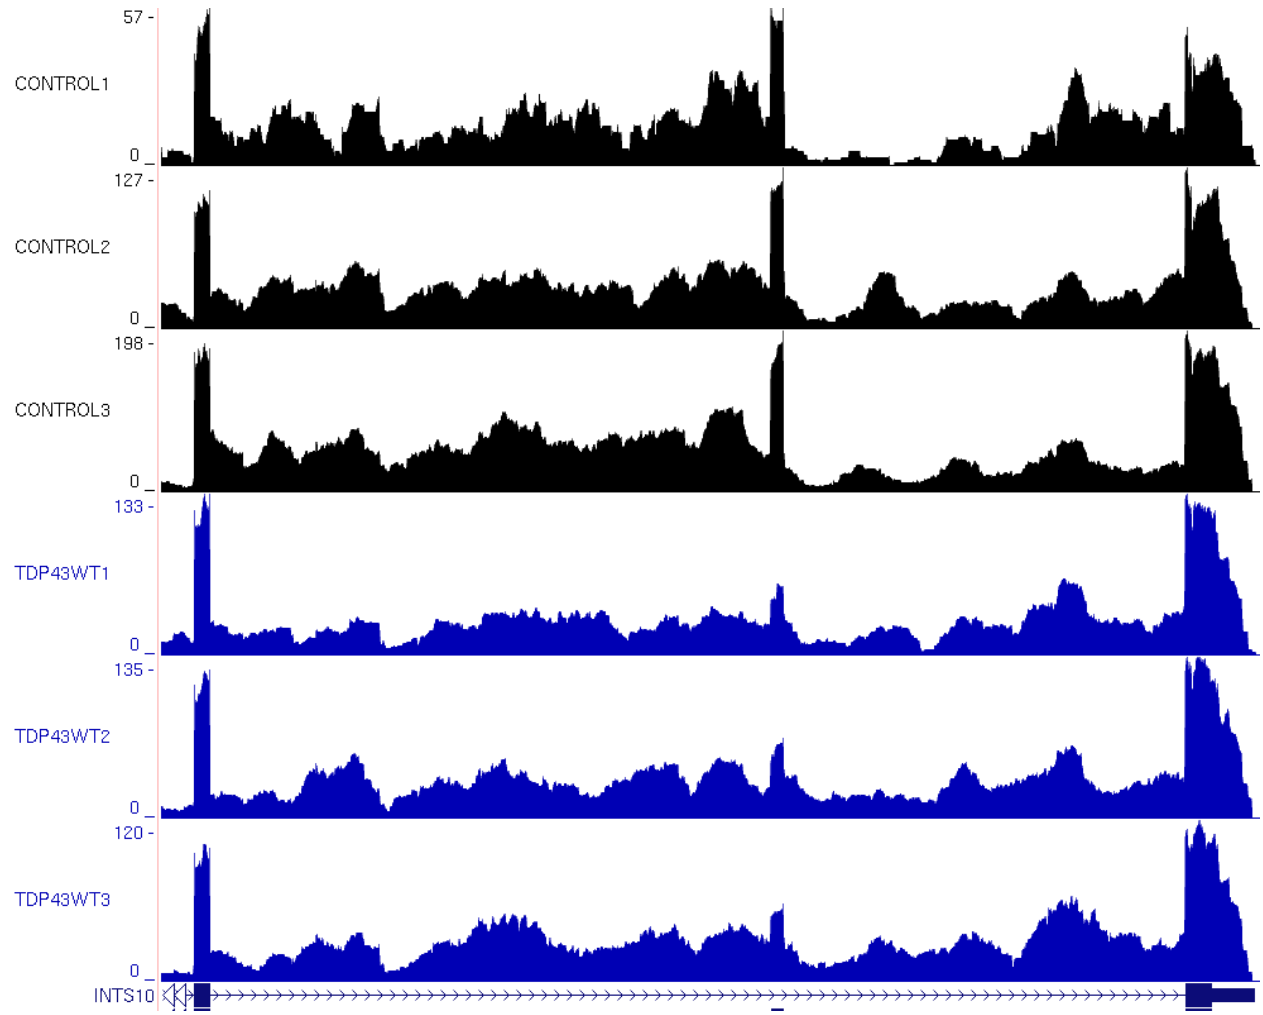

# AC

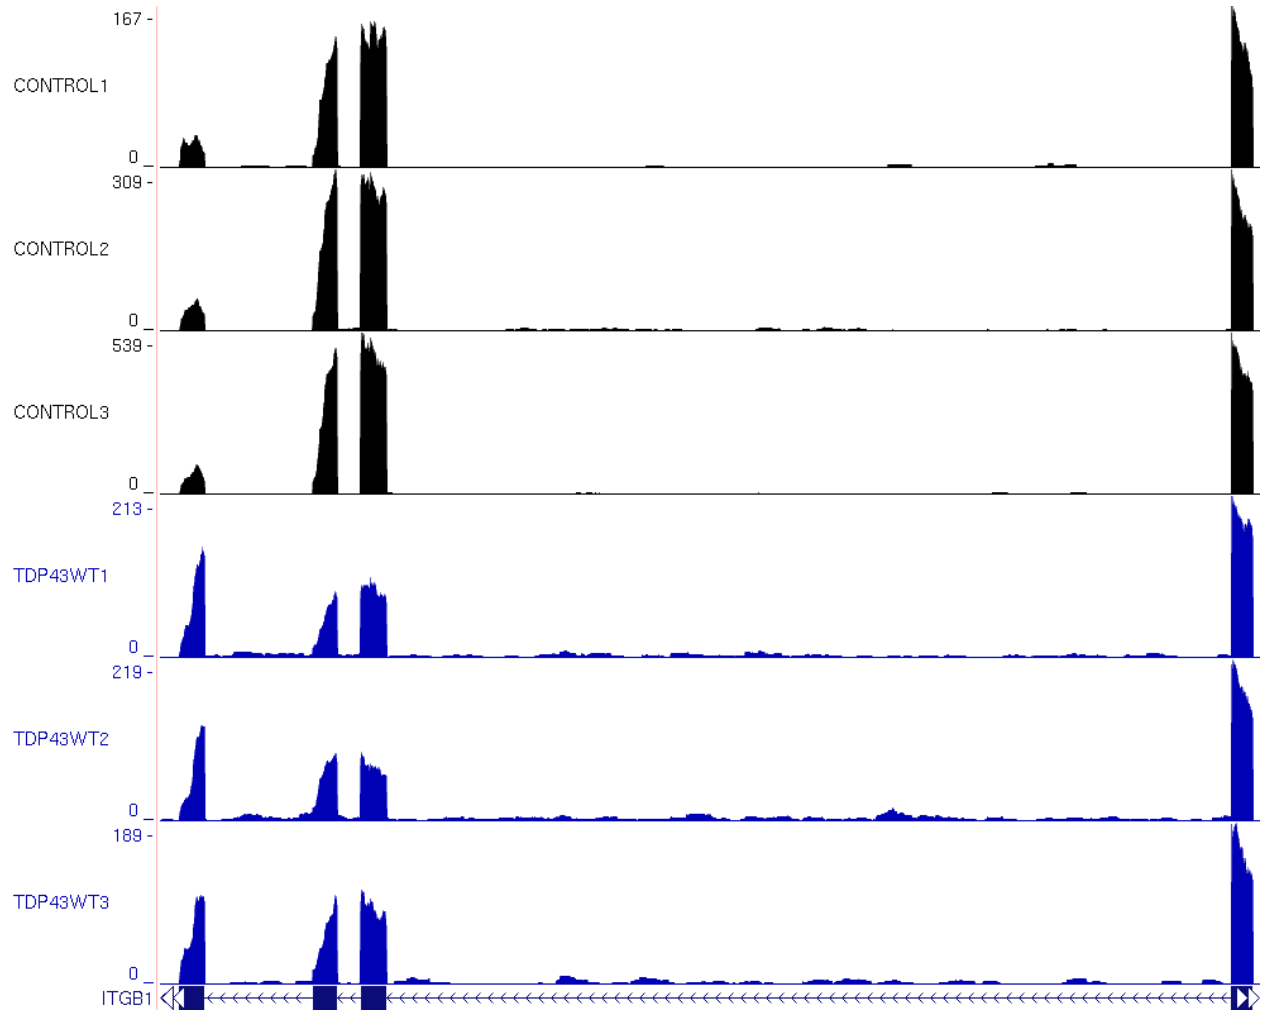

# AD

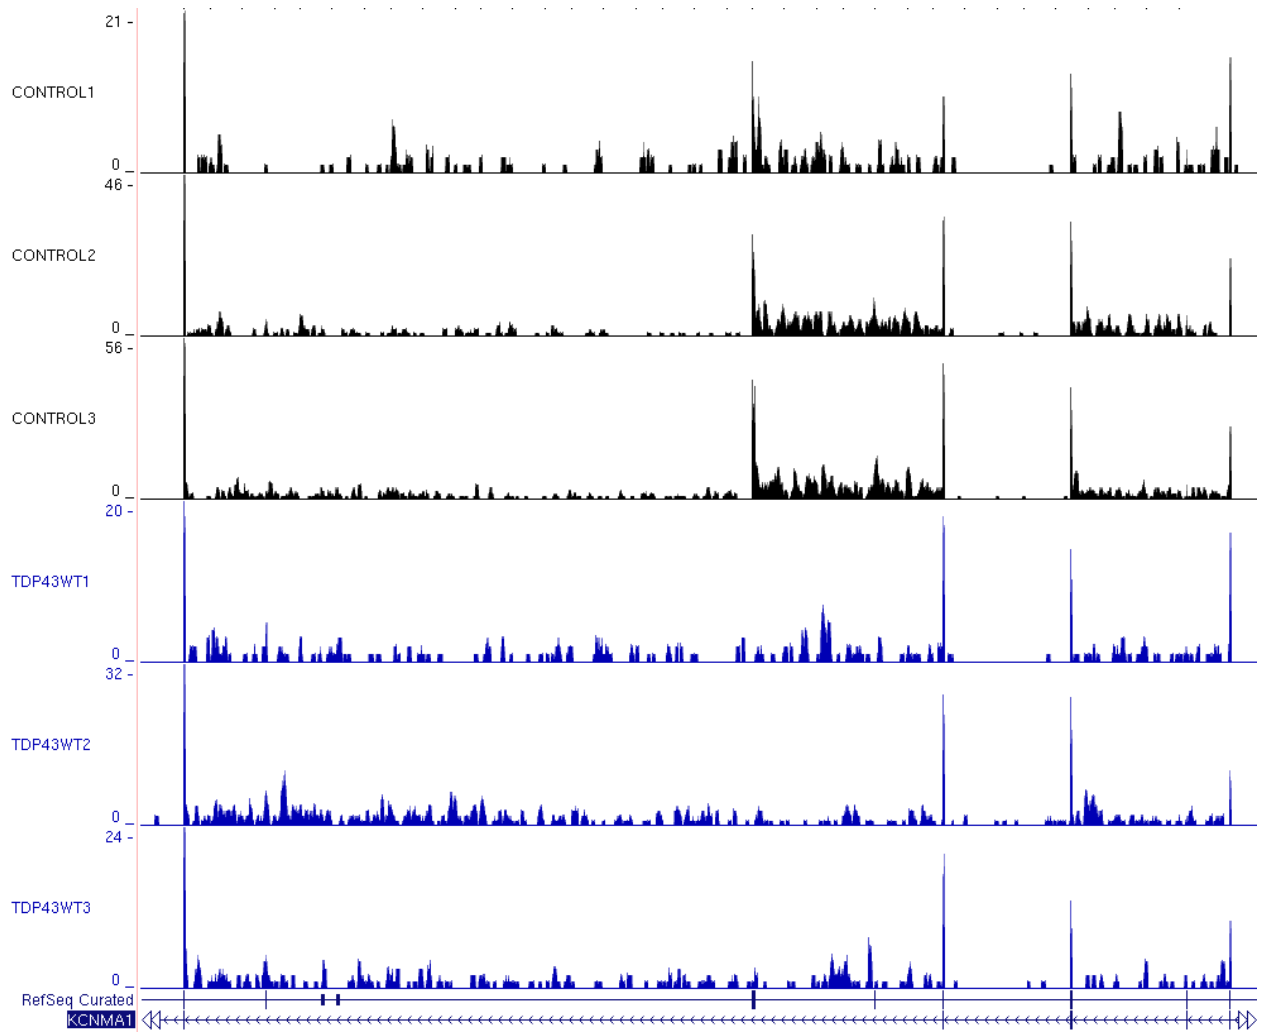

# AE

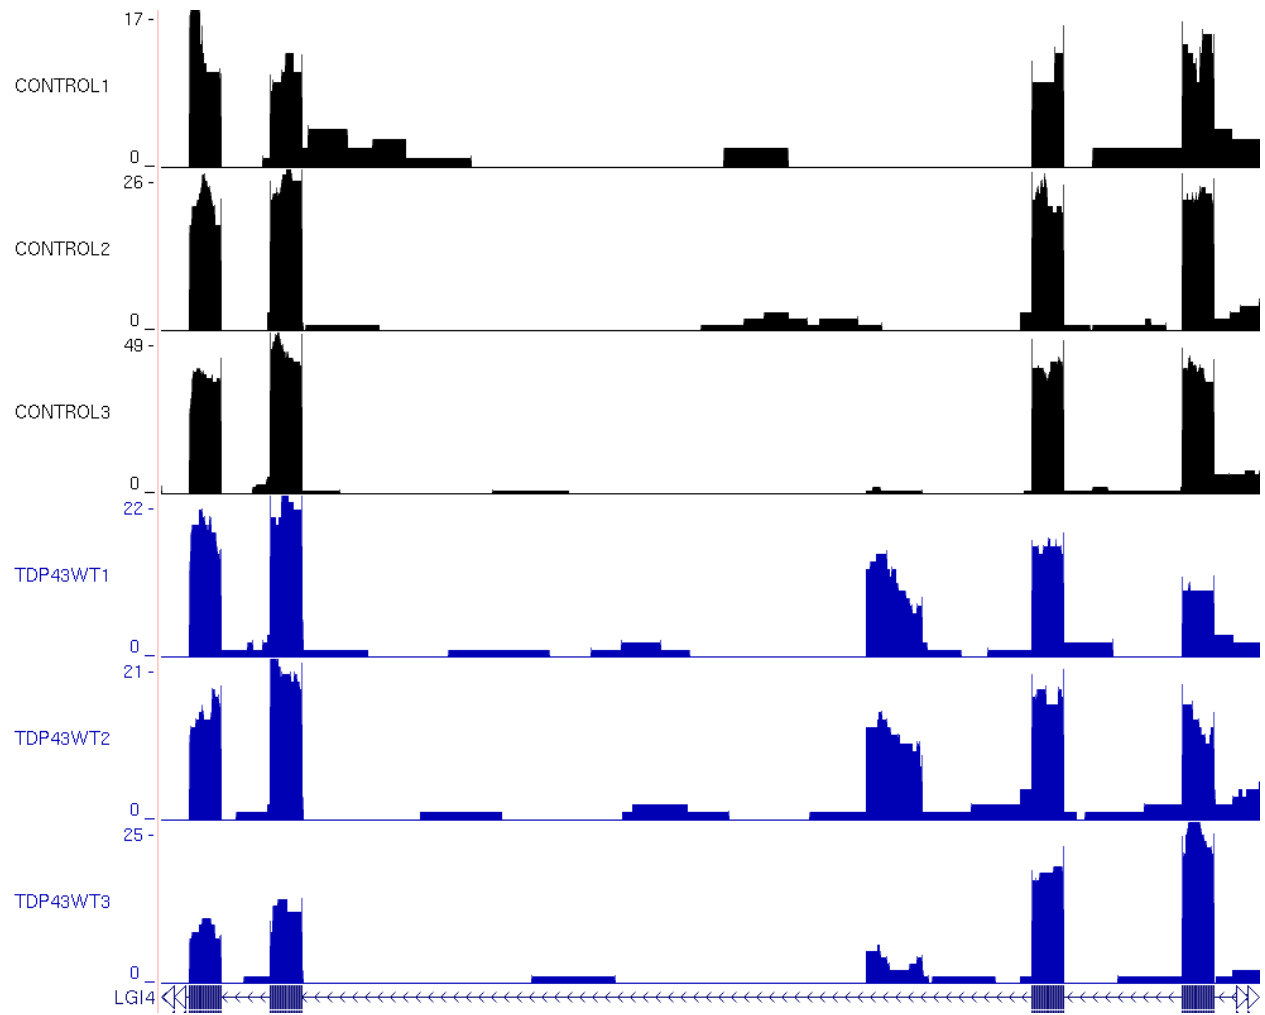



# AF

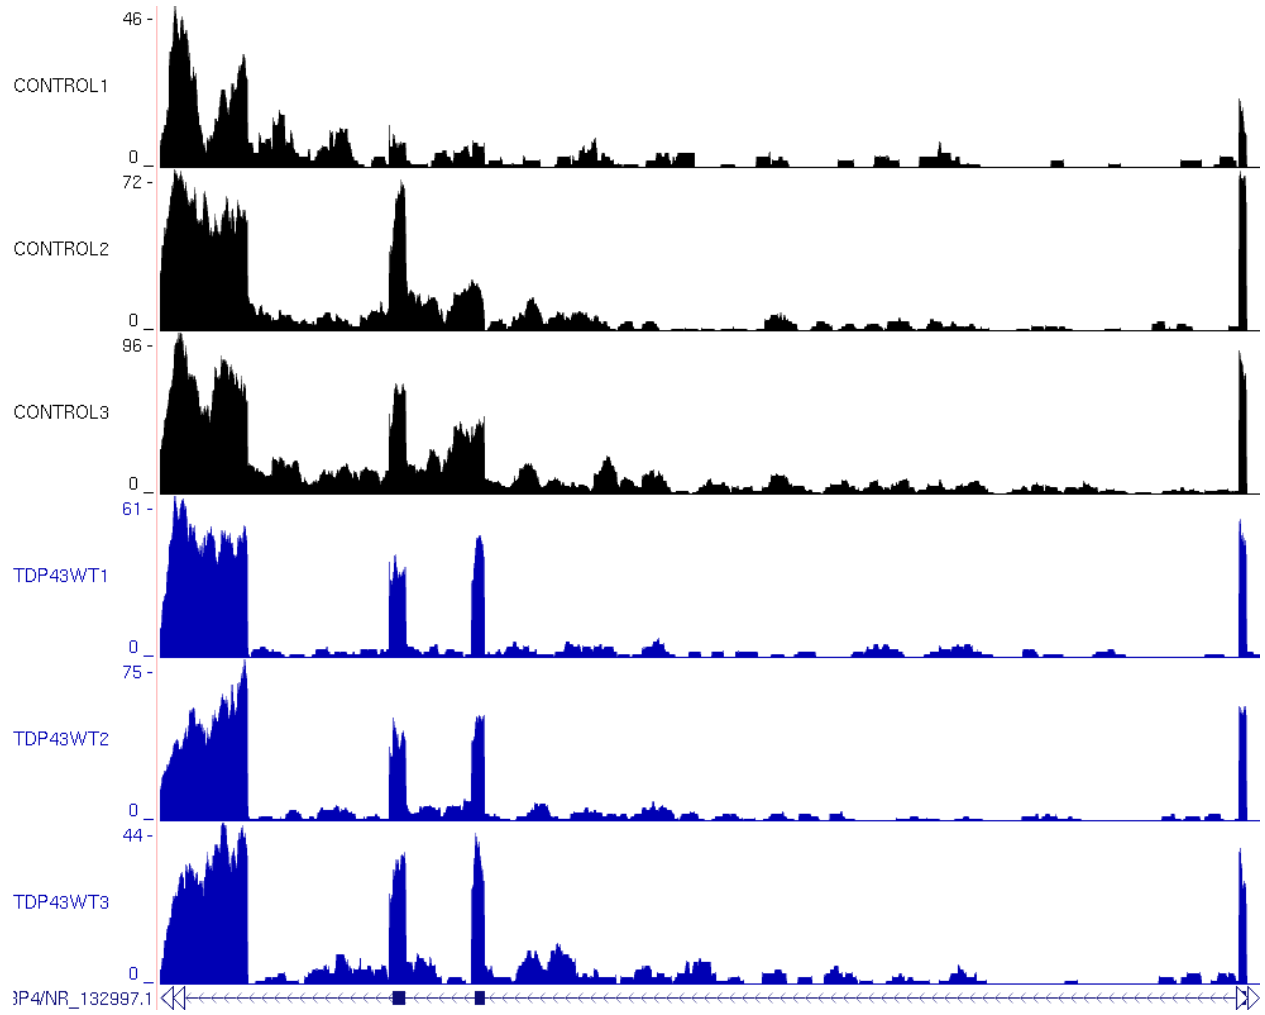

# AG

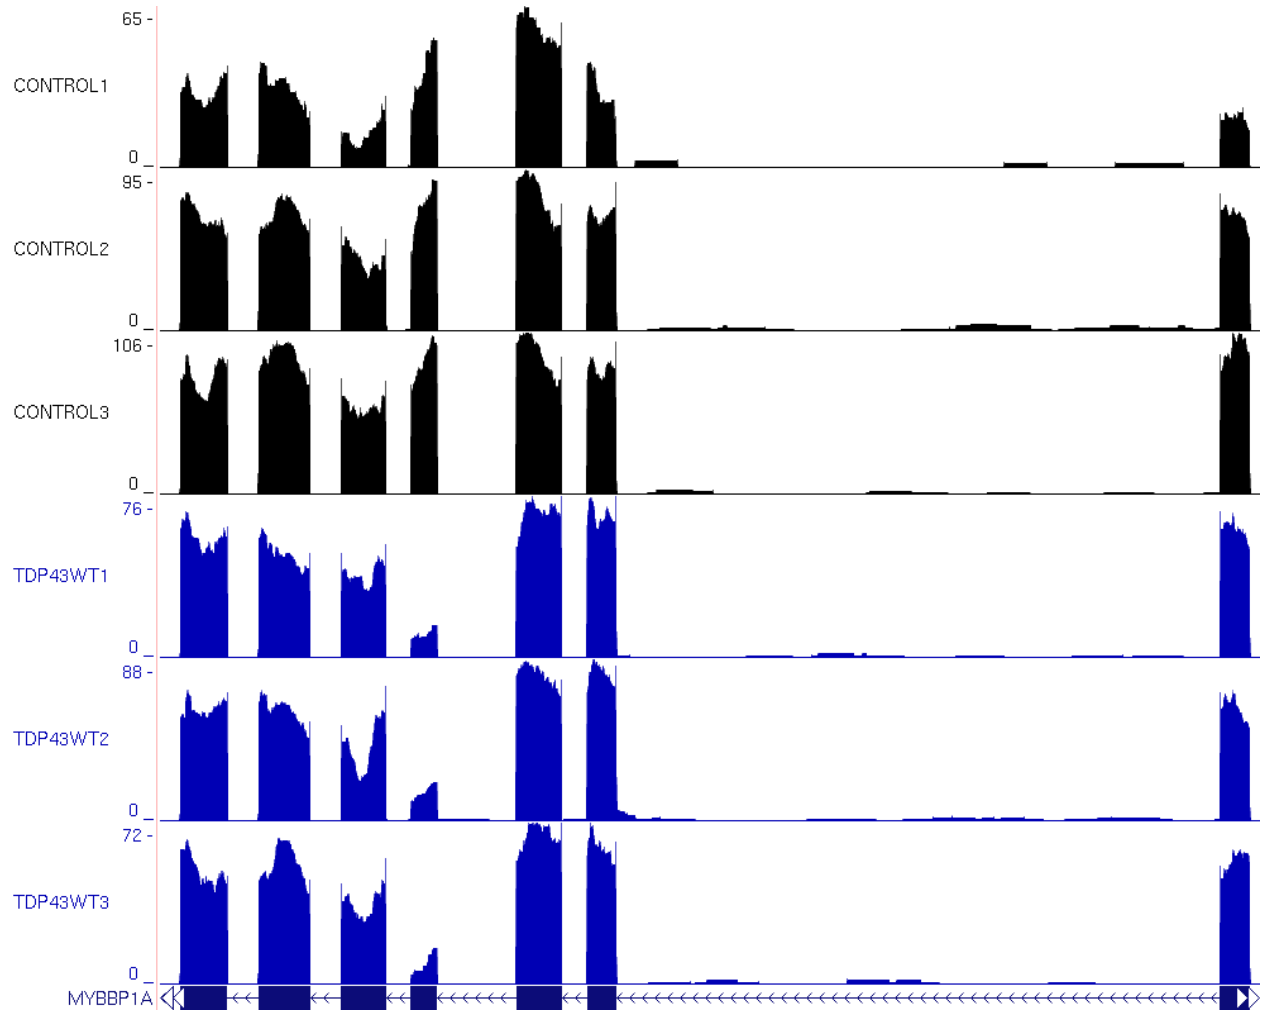

# AH

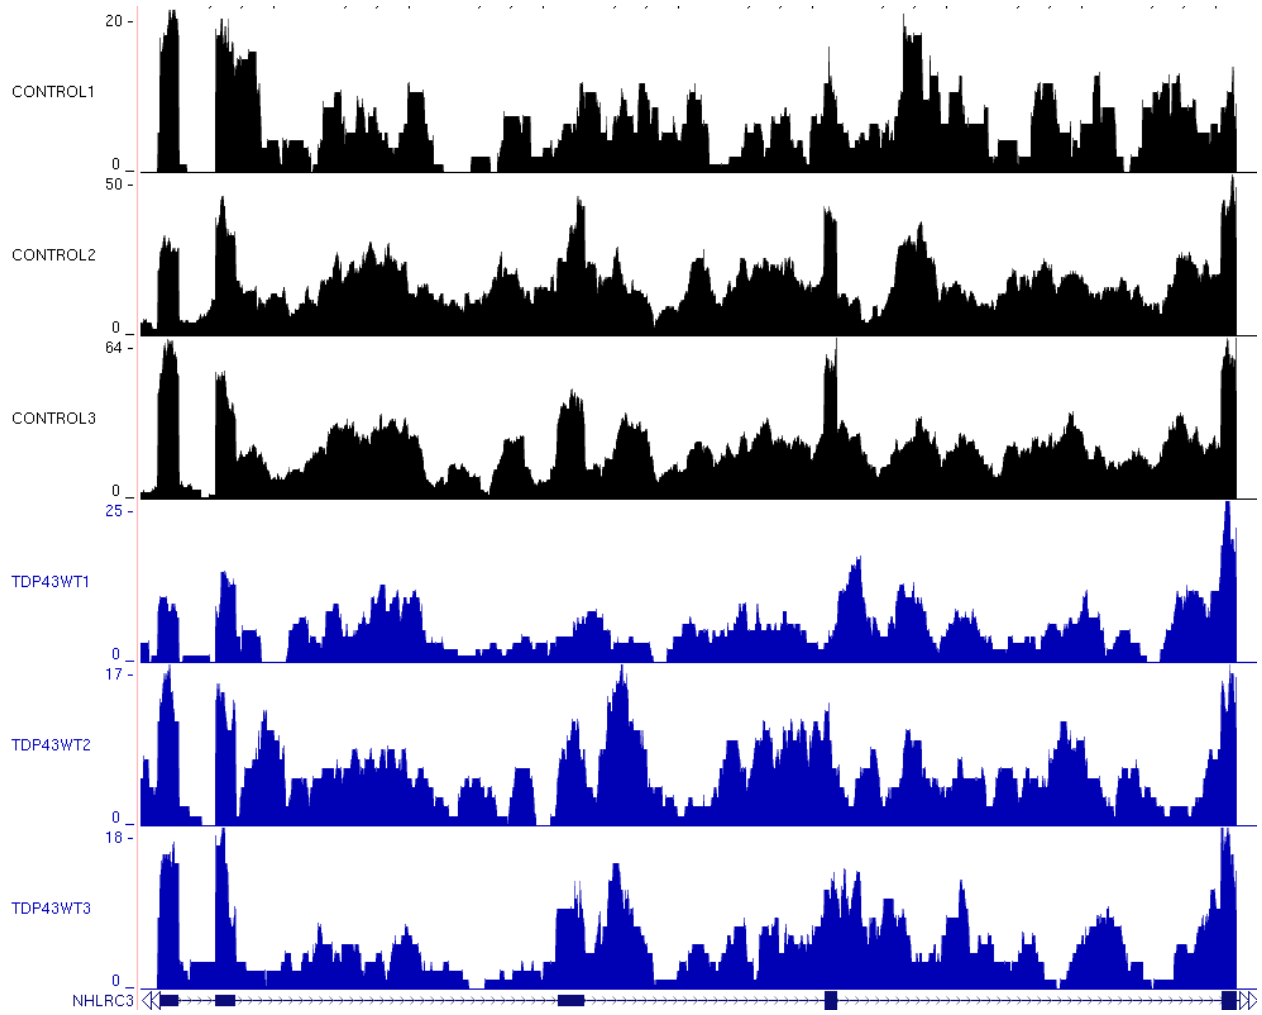

# AI

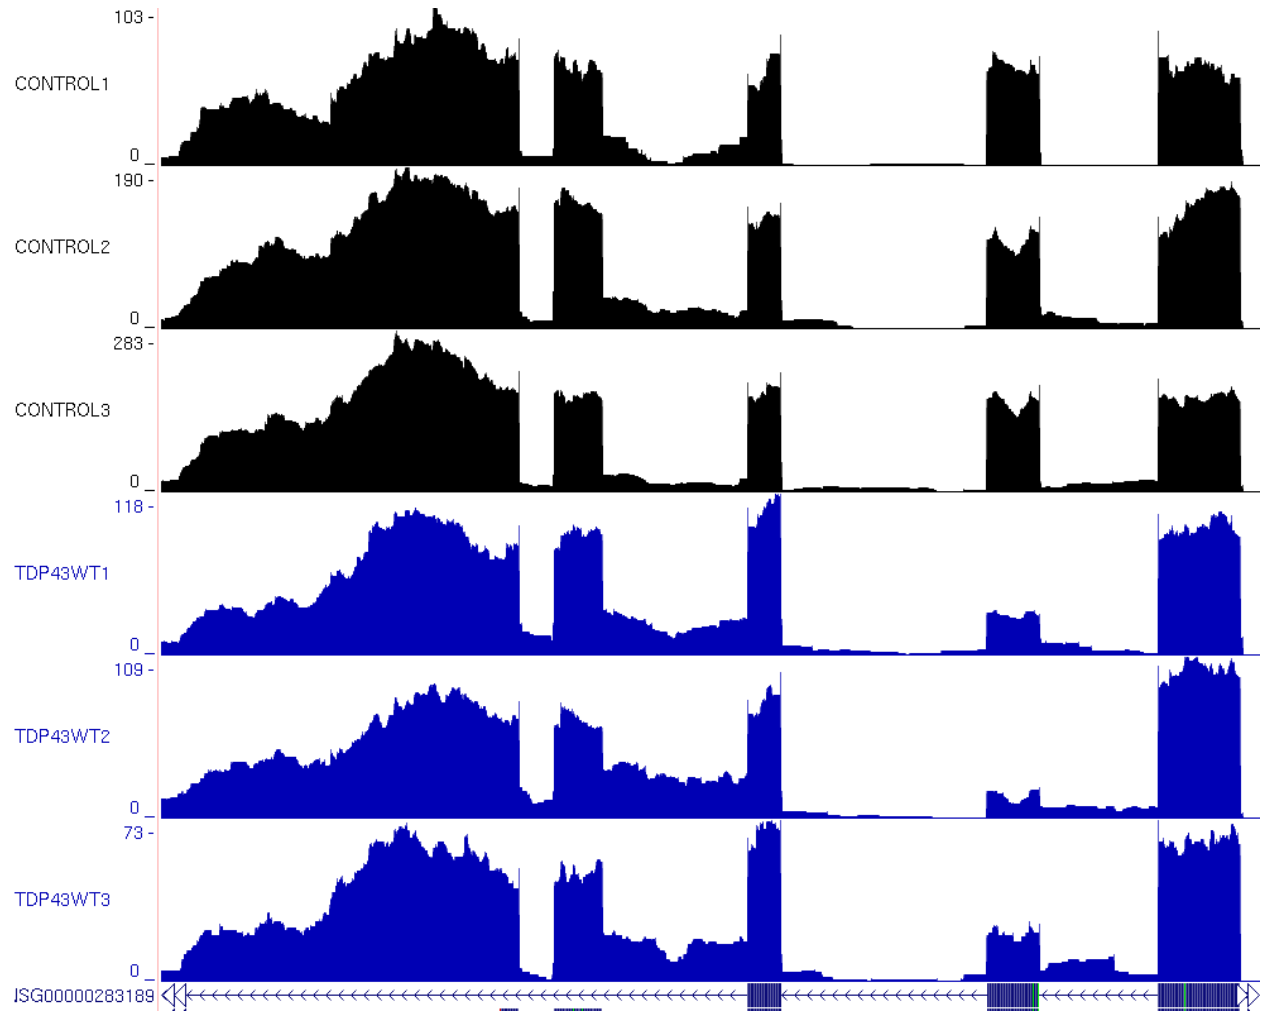

# AJ

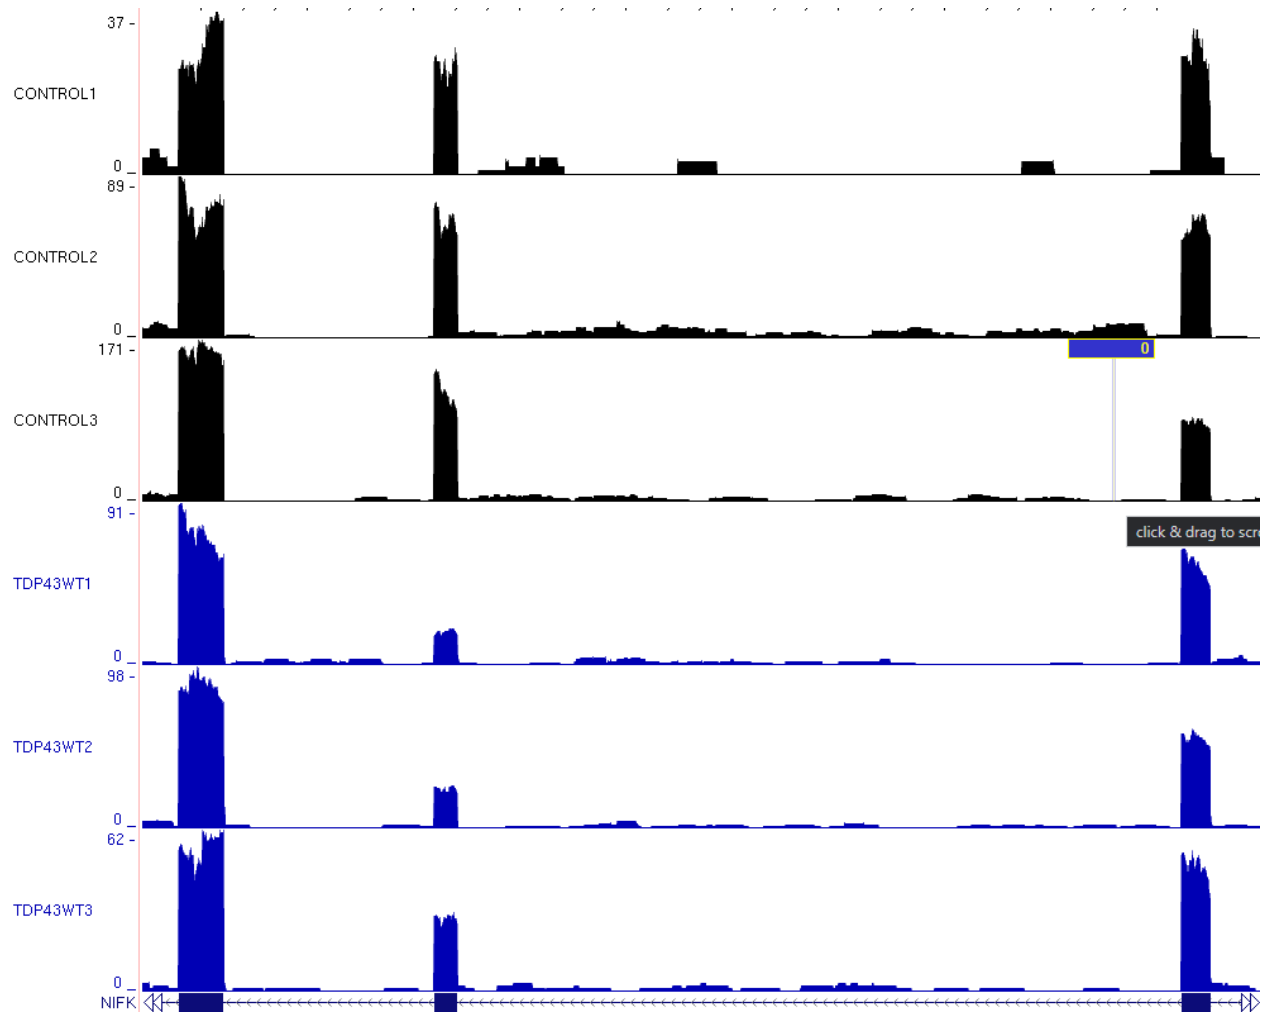

# AK

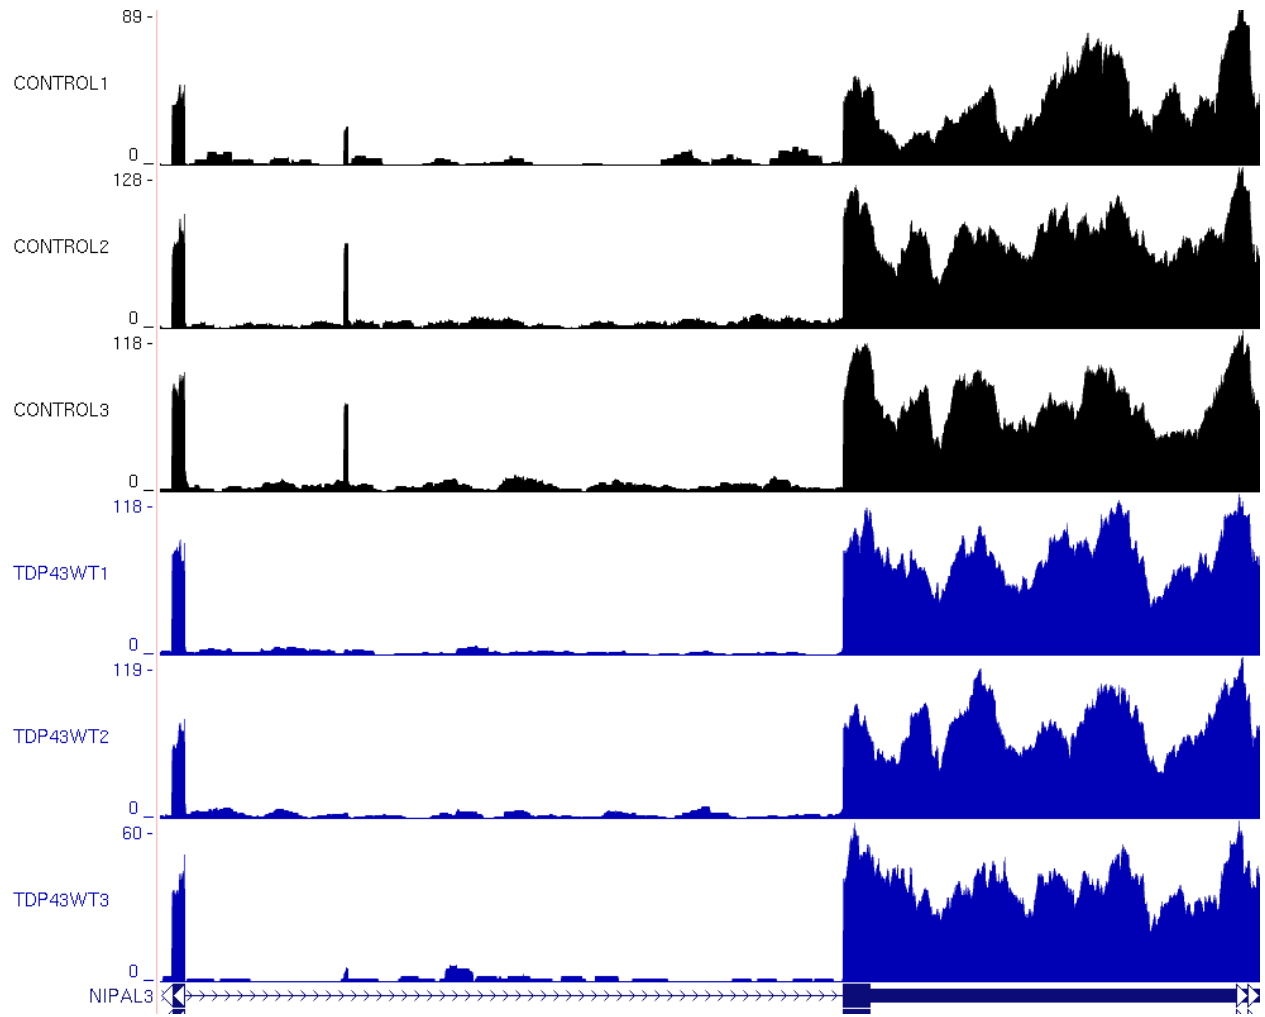

# AL

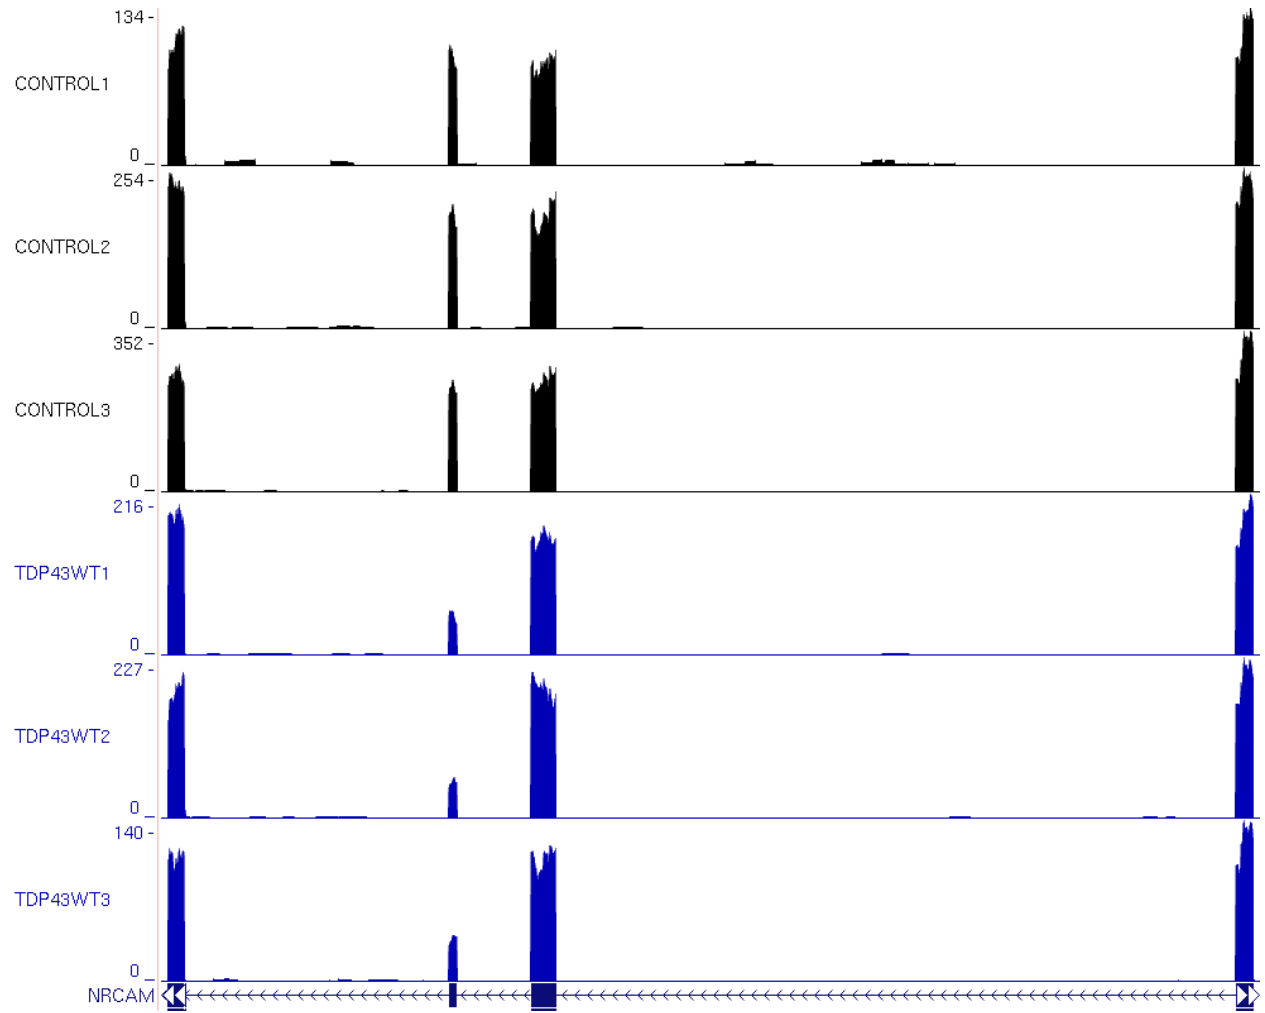

# AM

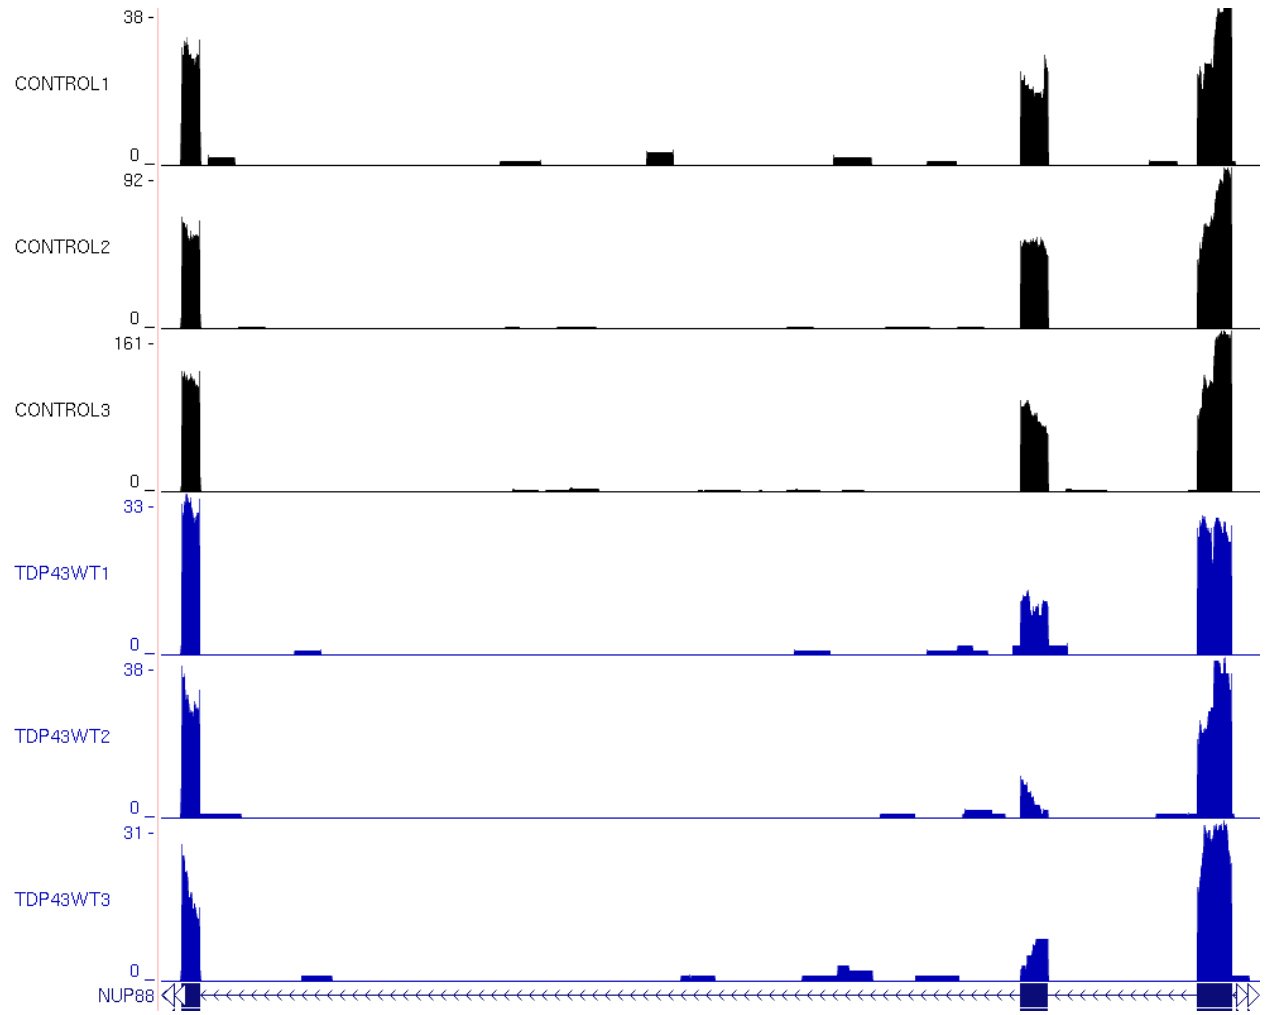



# AN

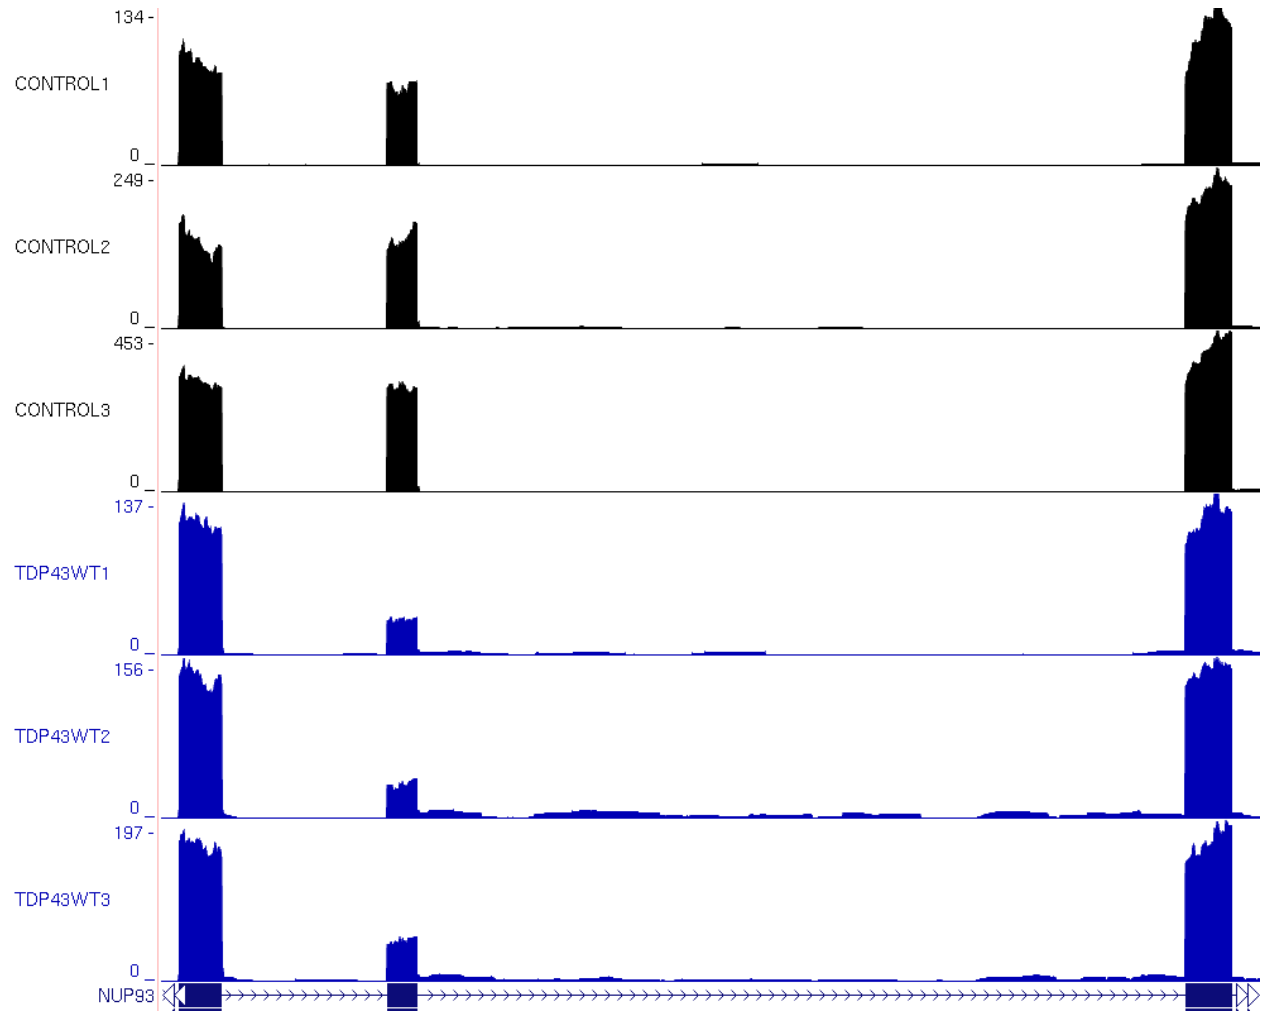

# AO

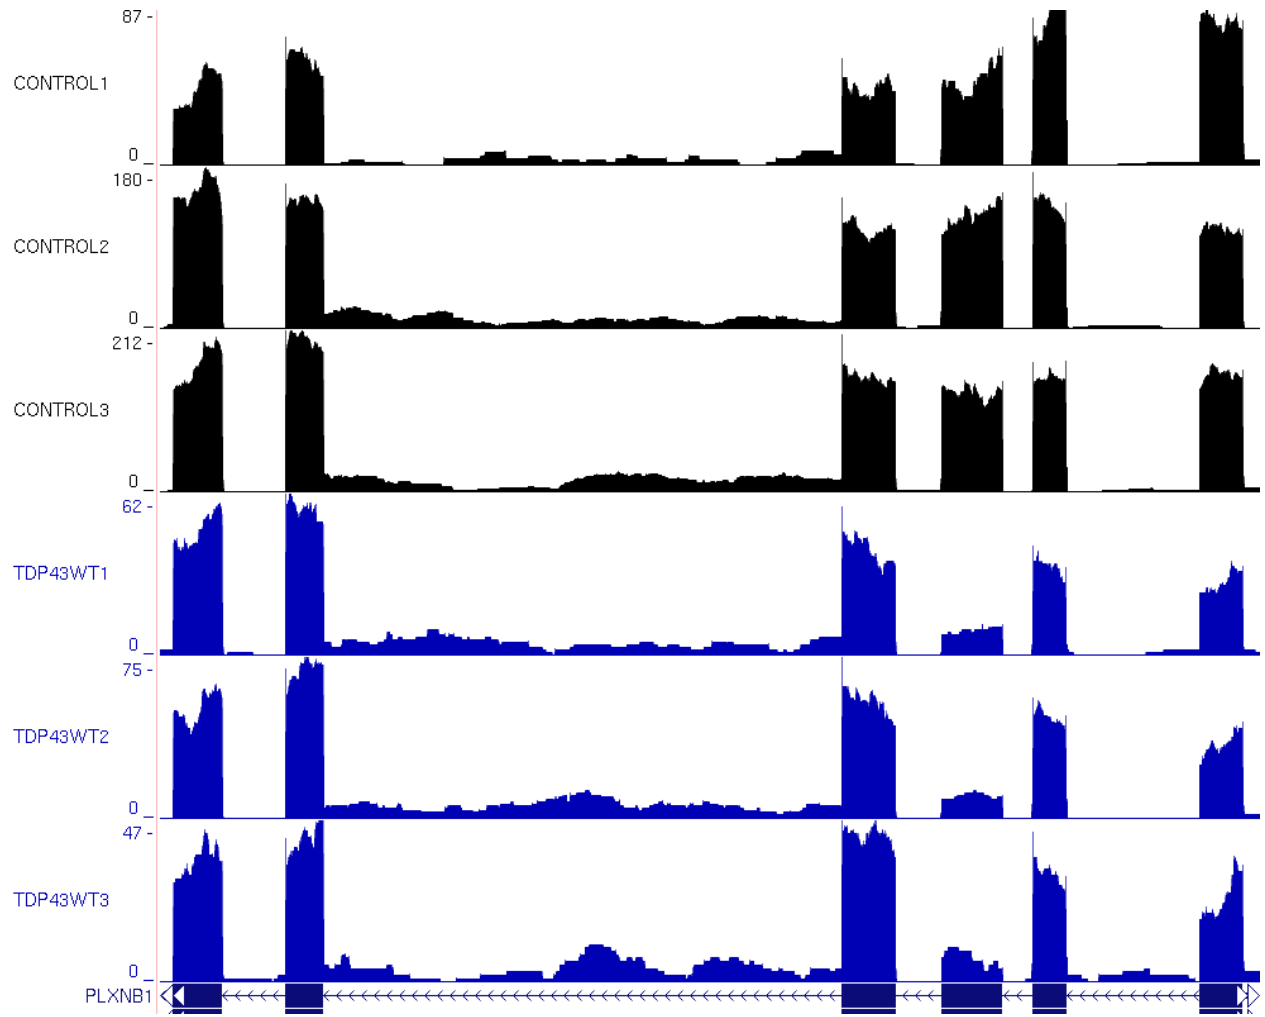

# AP

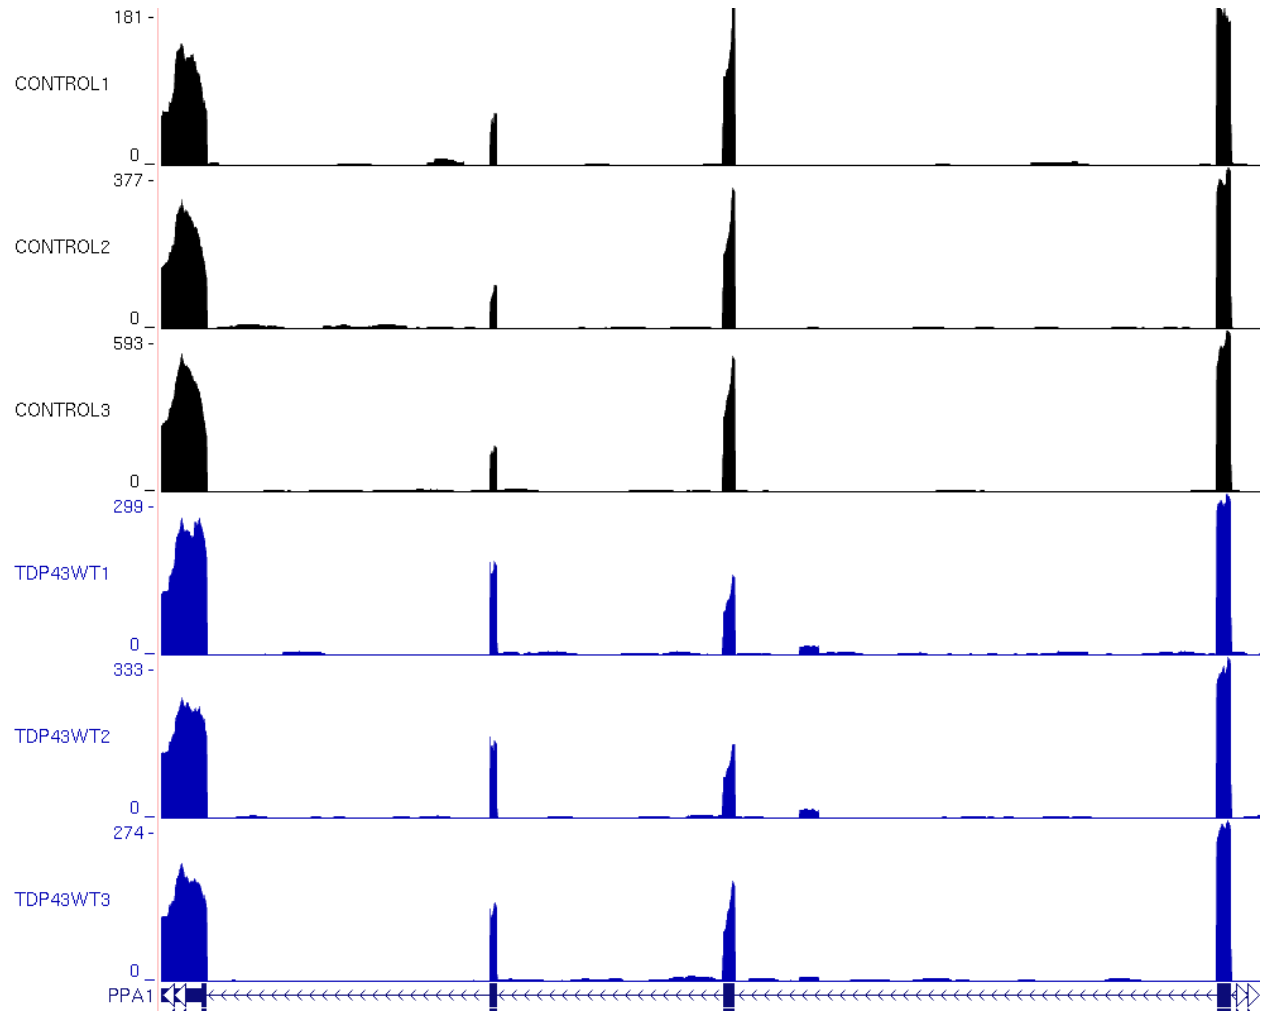

# AQ

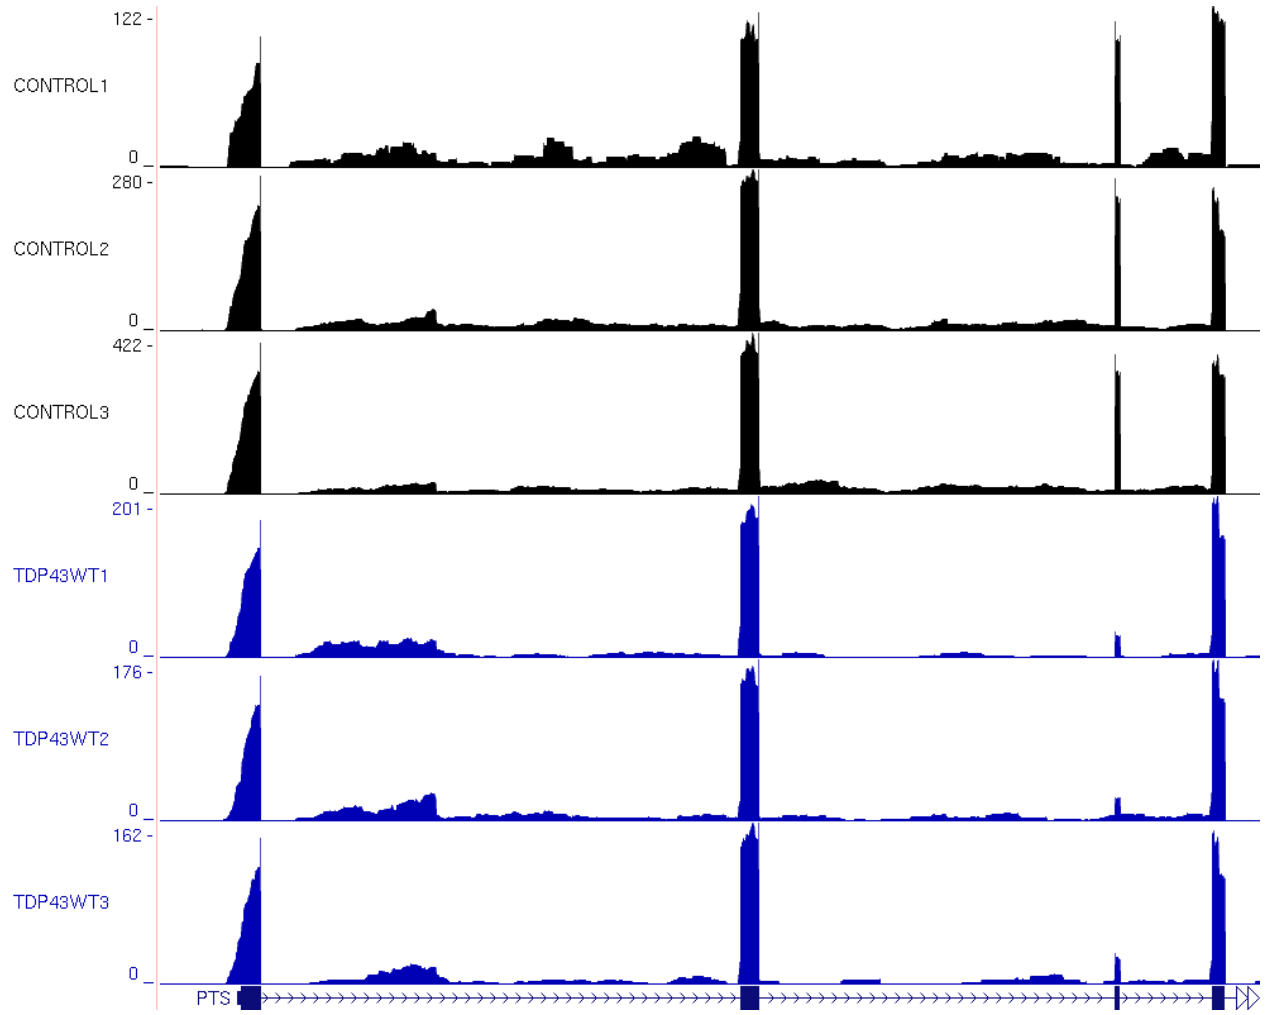

# AR

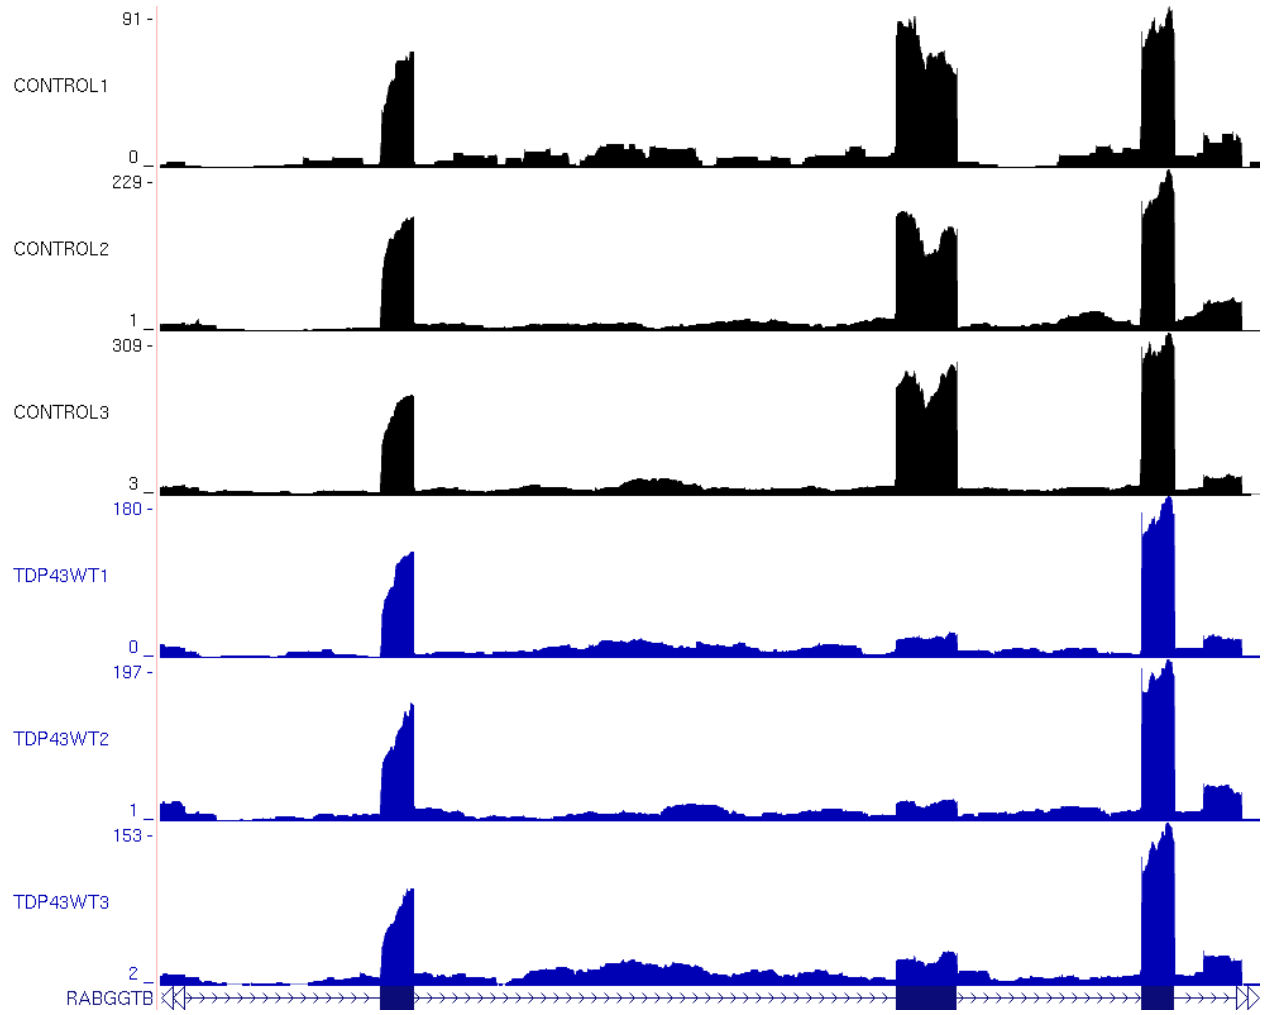

# AS

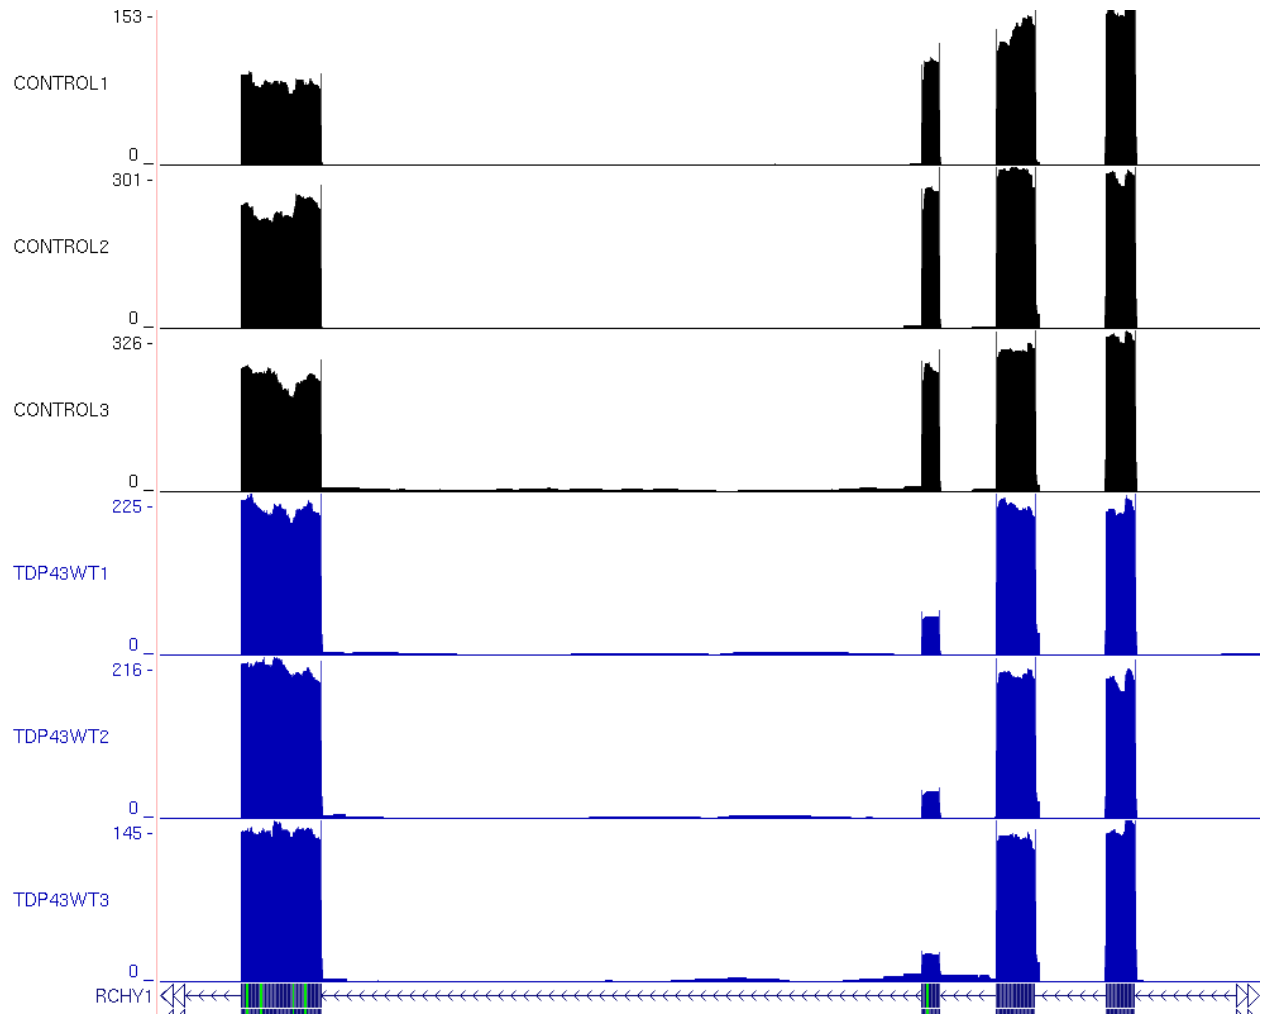

# AT

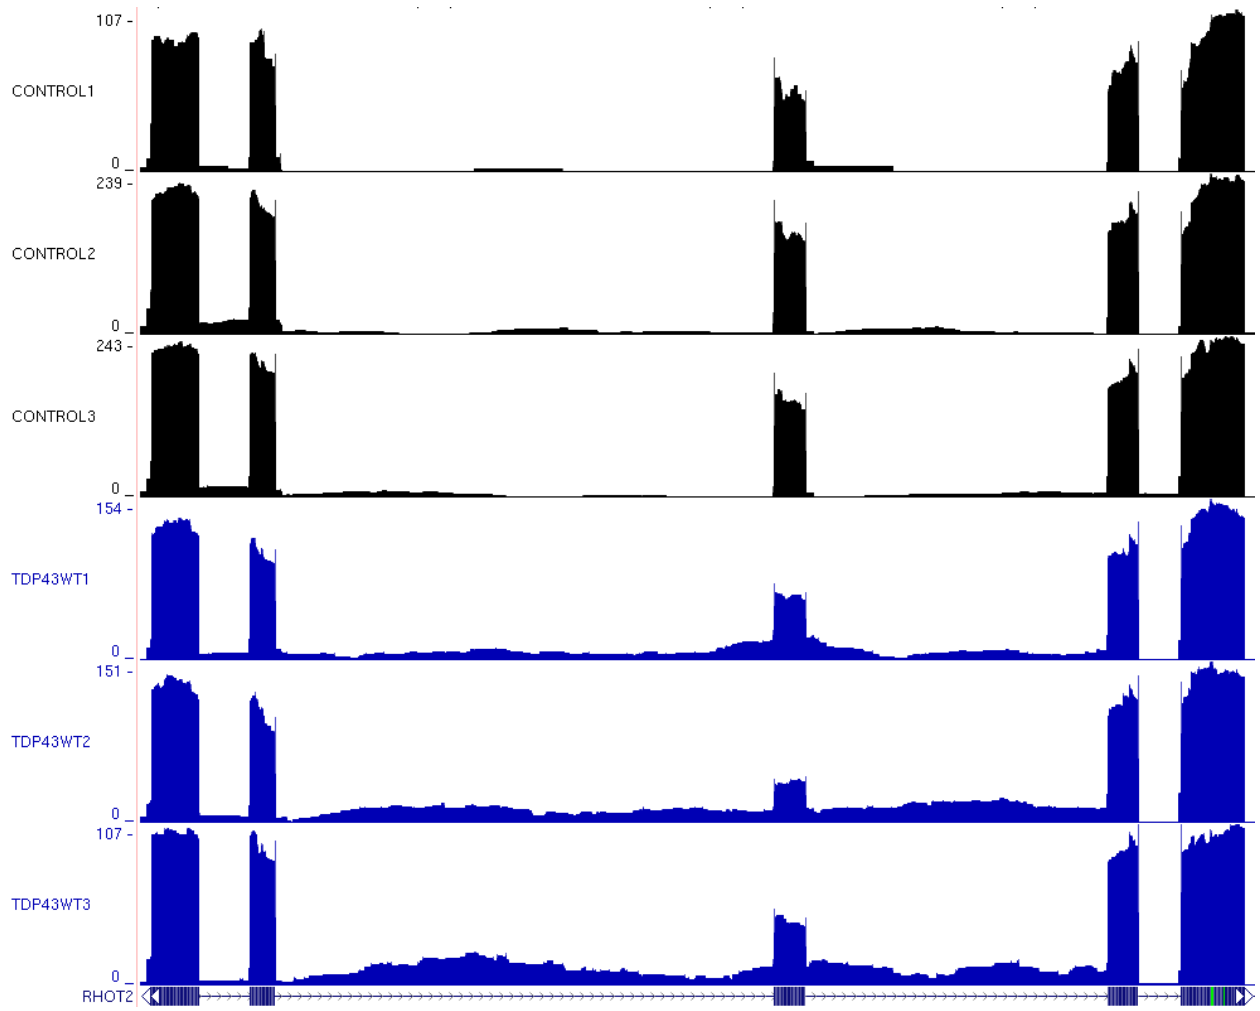

# AU

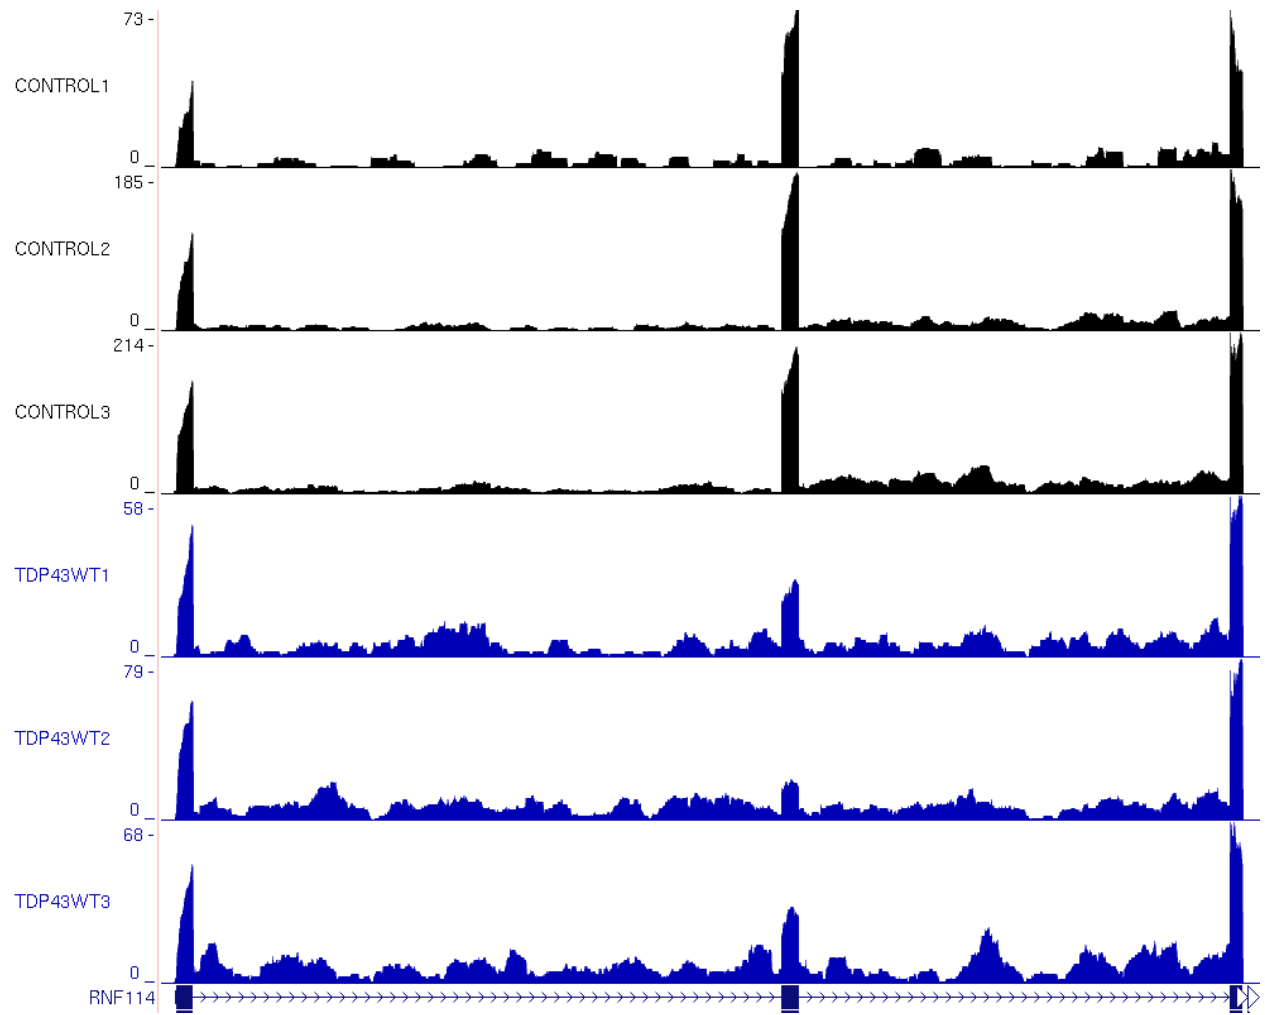



# AV

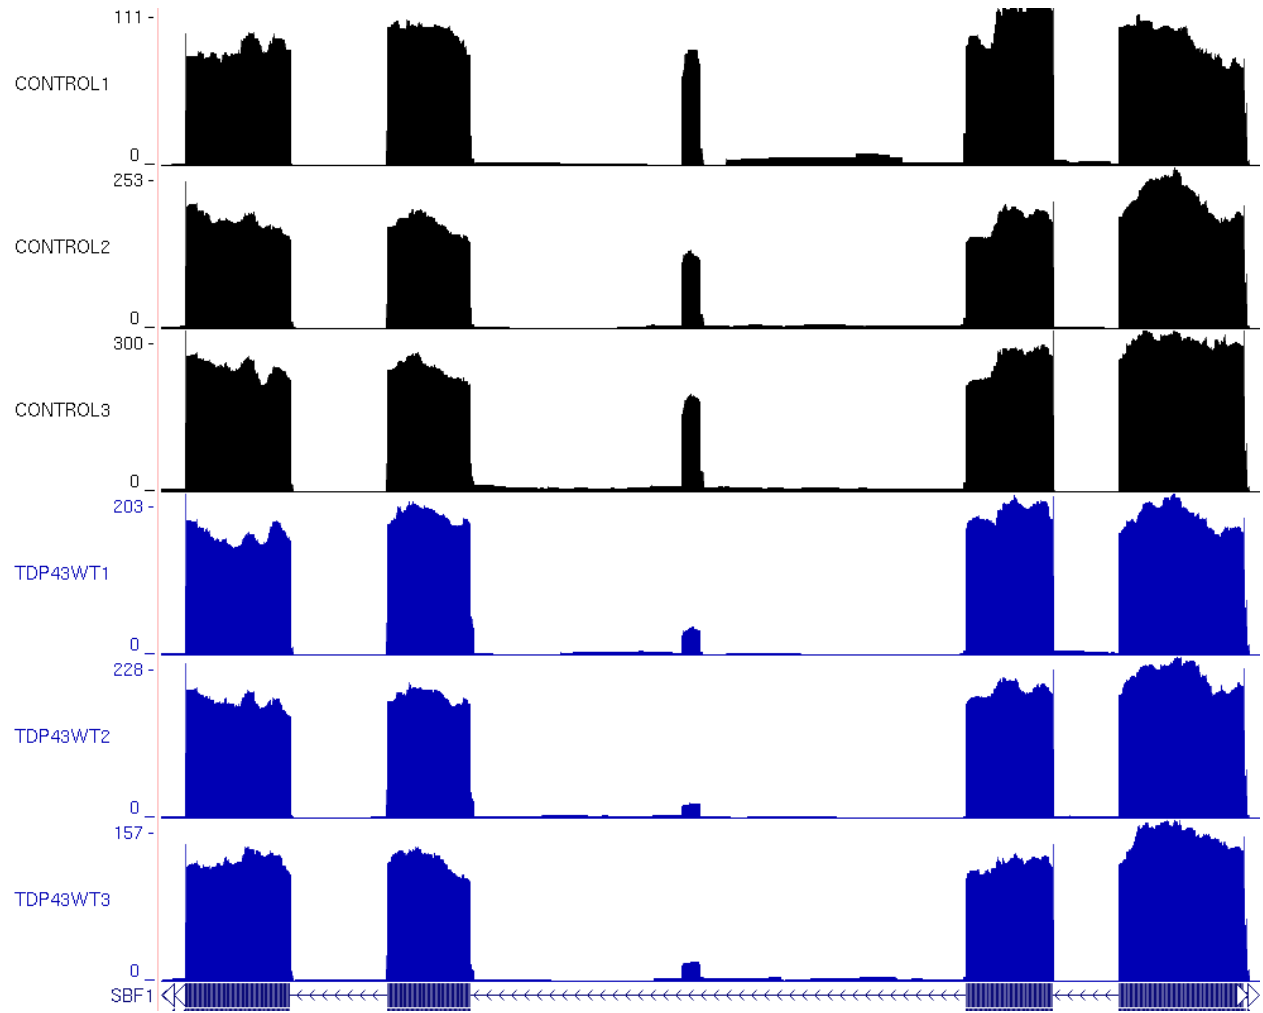

# AW

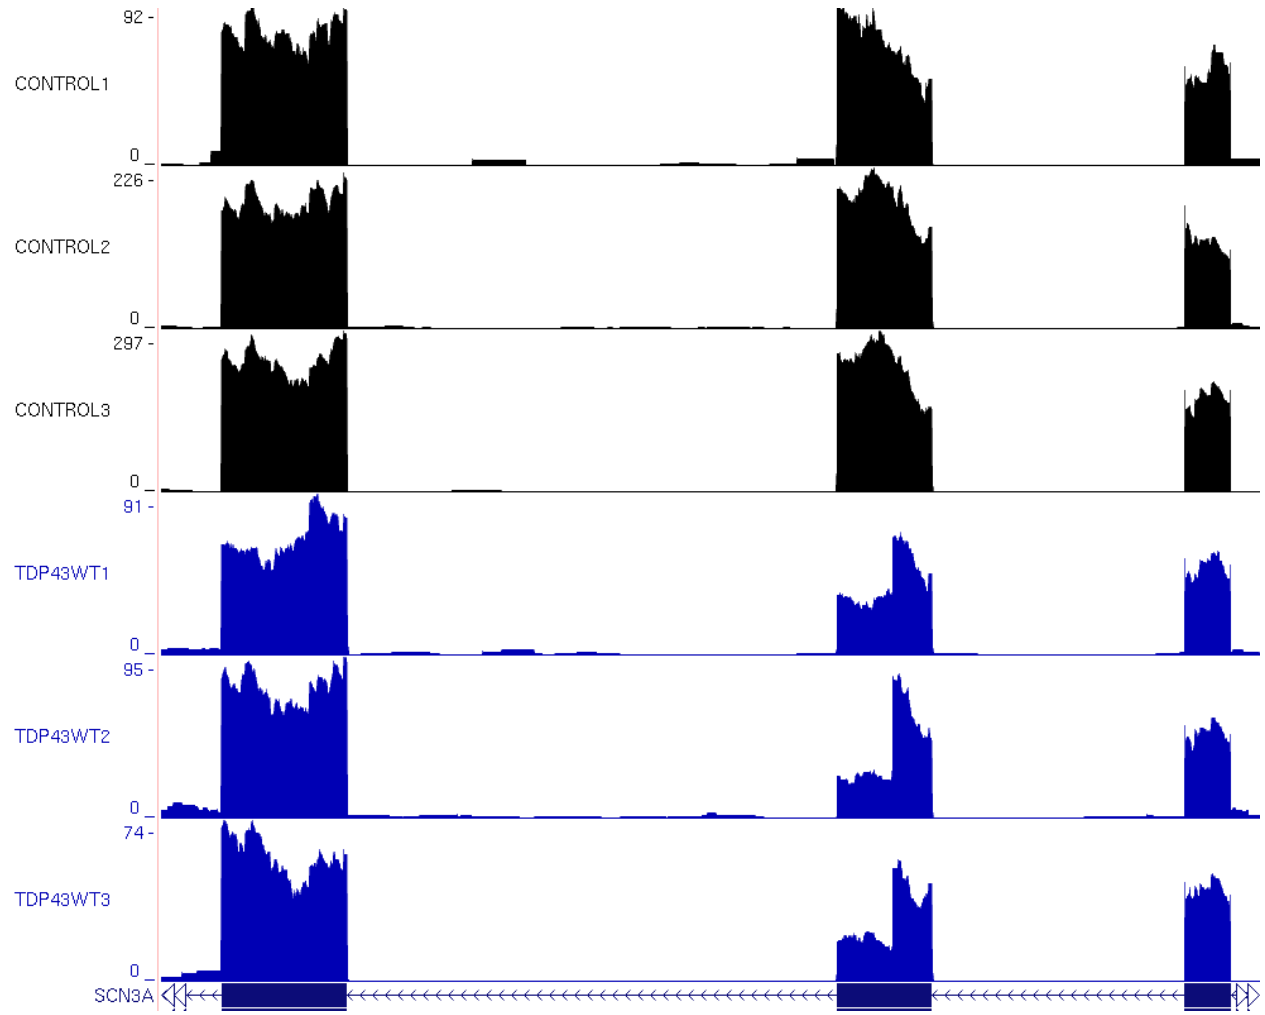

# AX

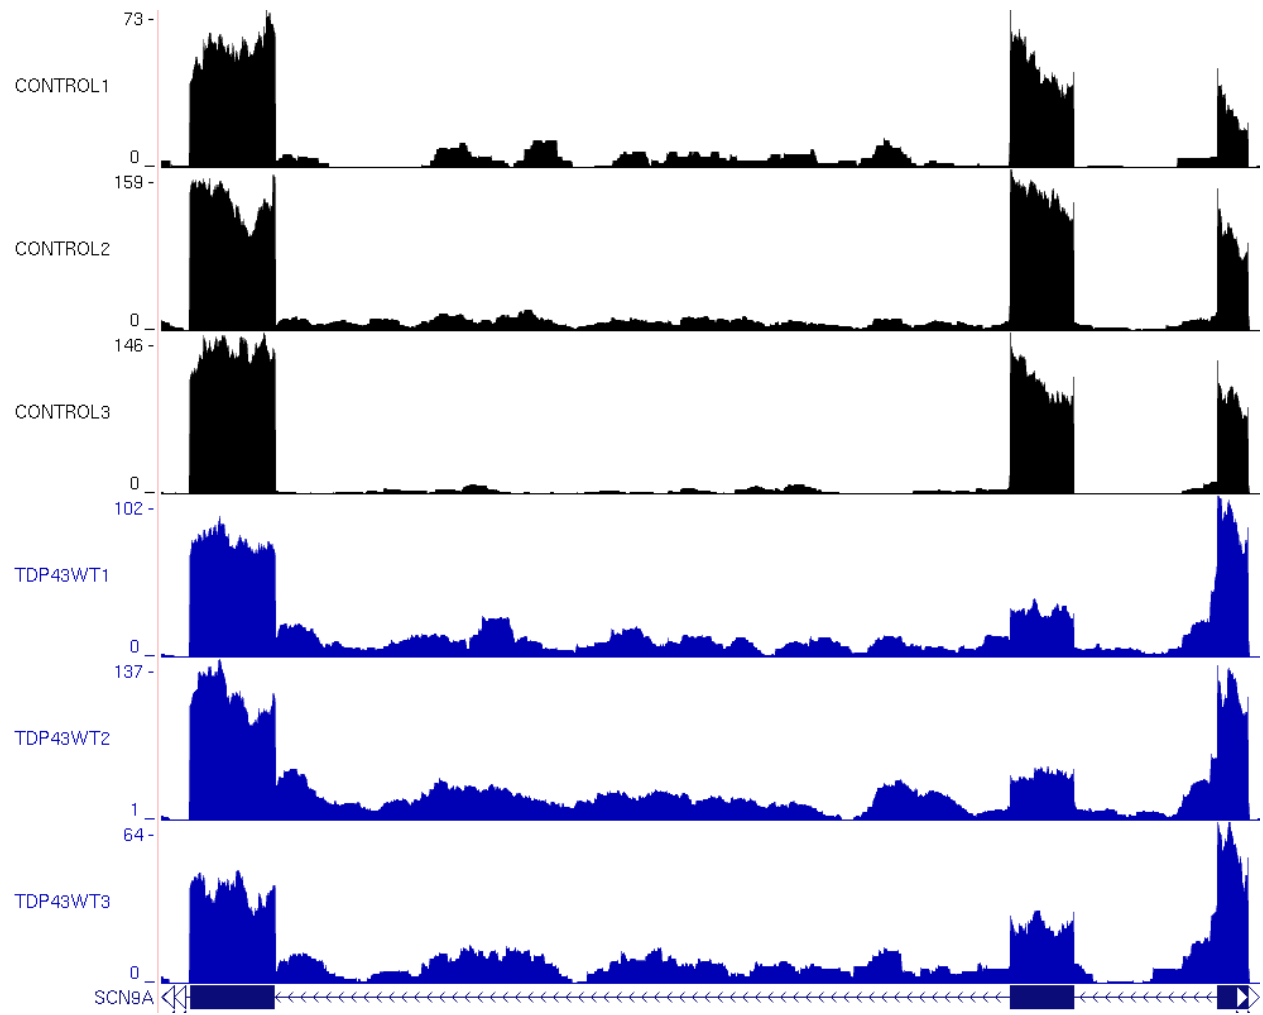

# AY

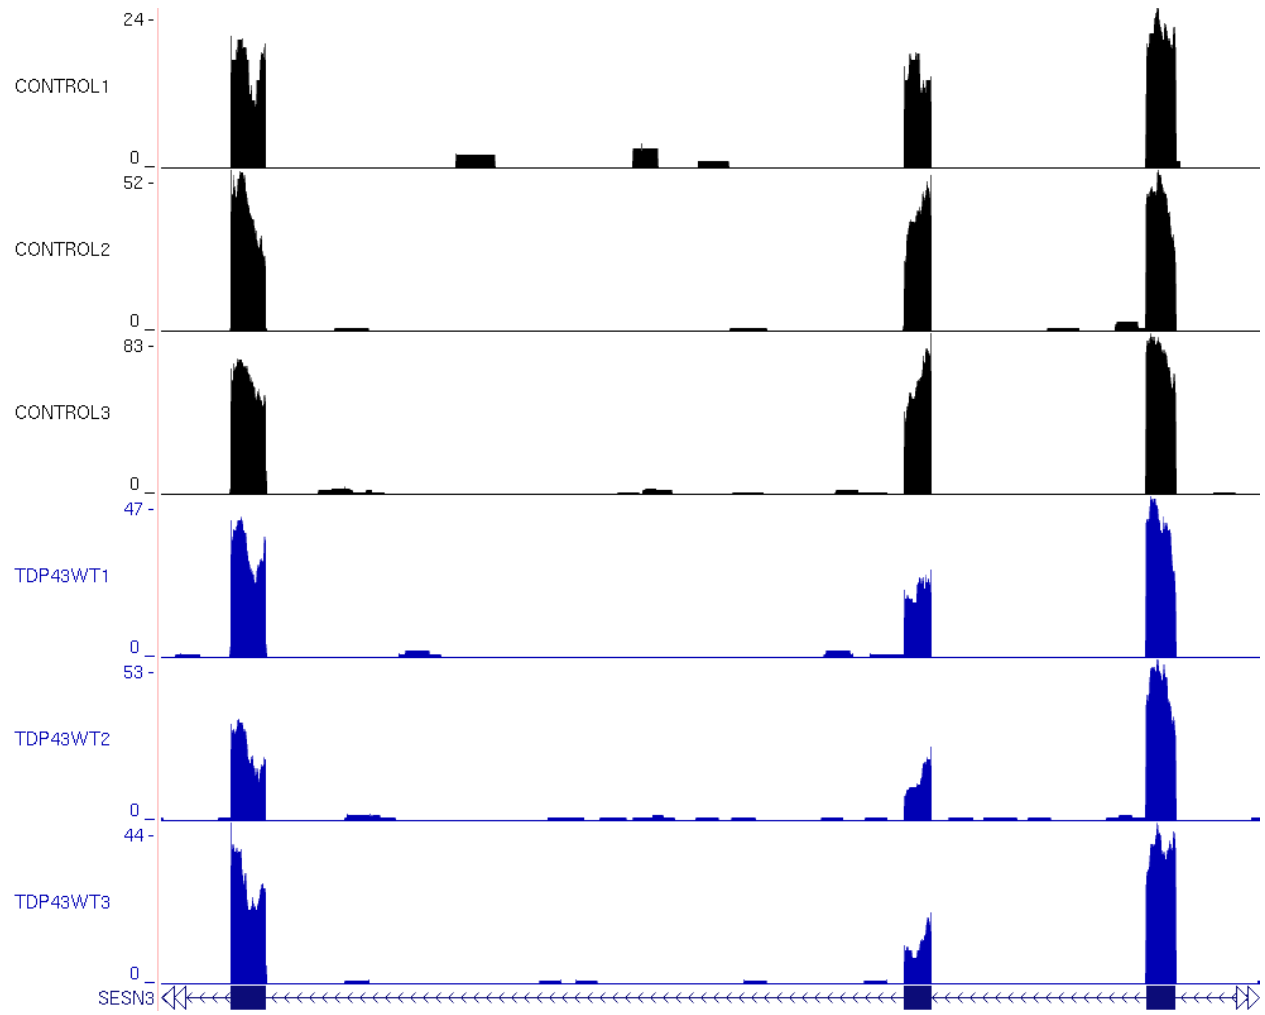

# AZ

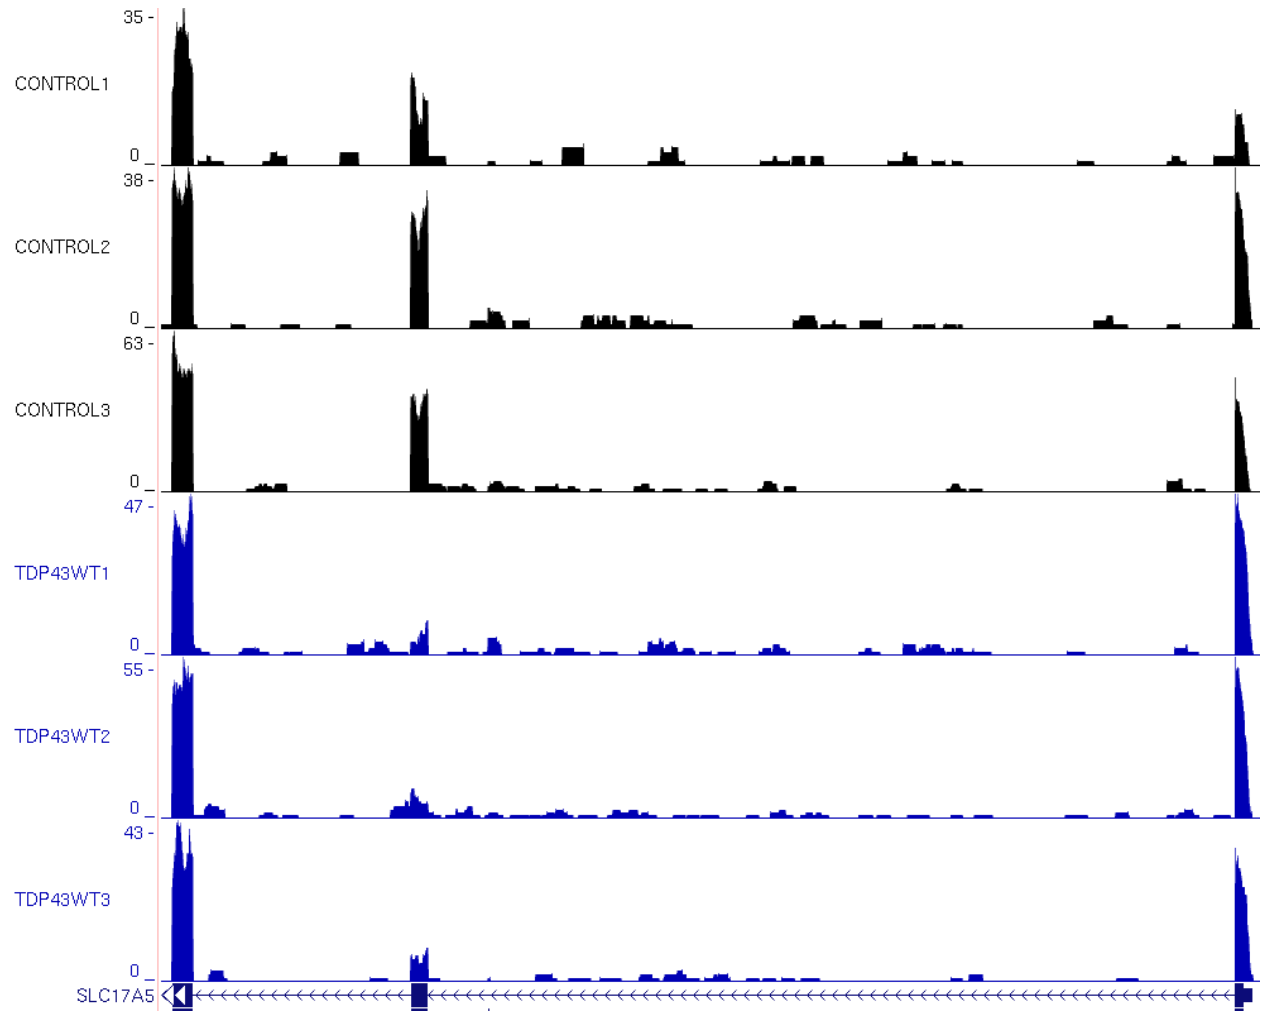

# AAA

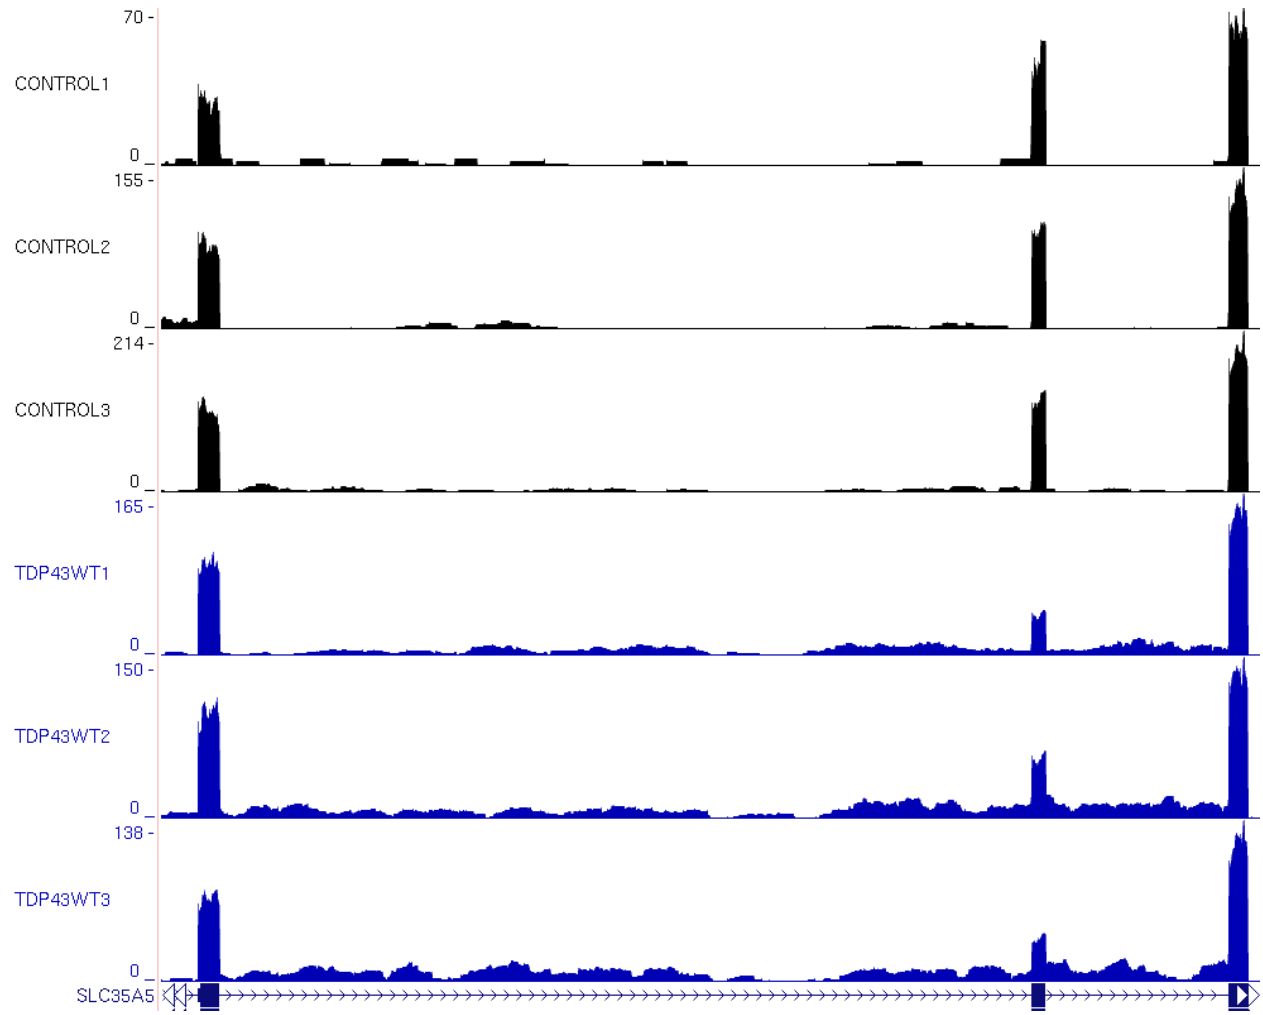

# AAB

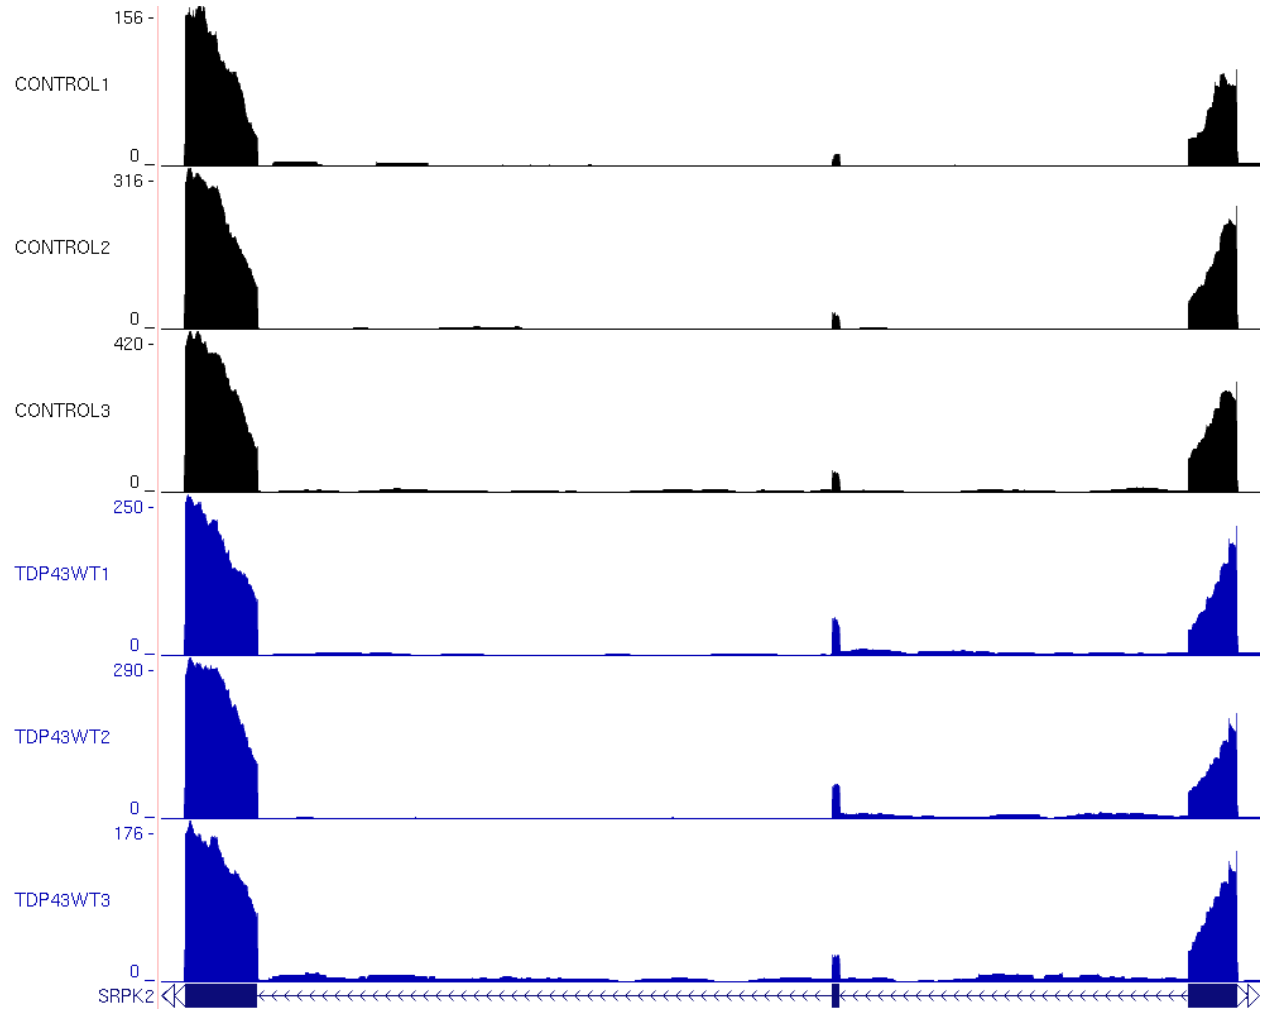

# AAC

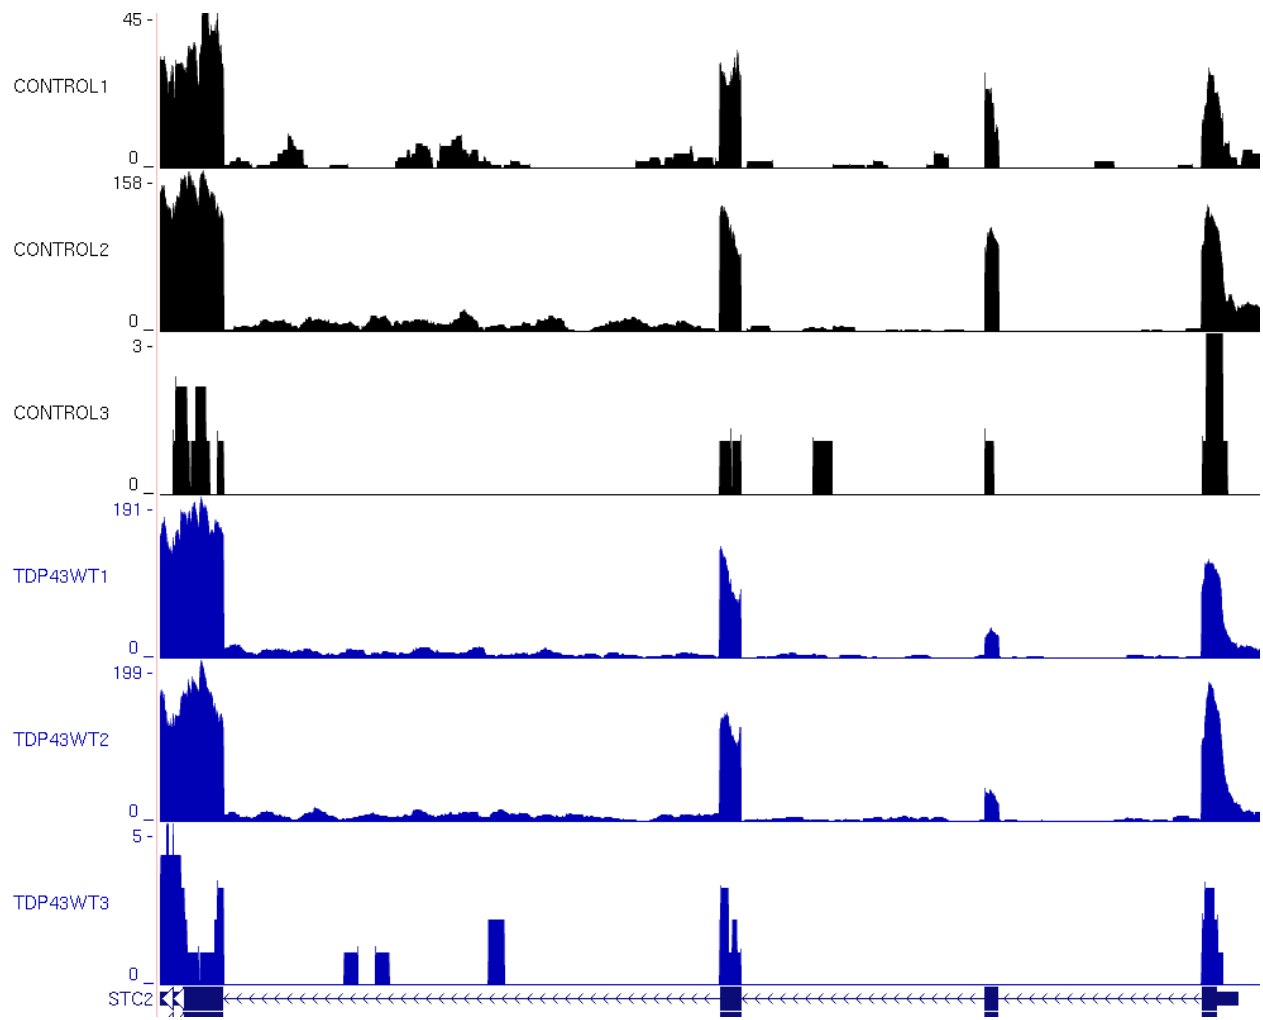



# AAD

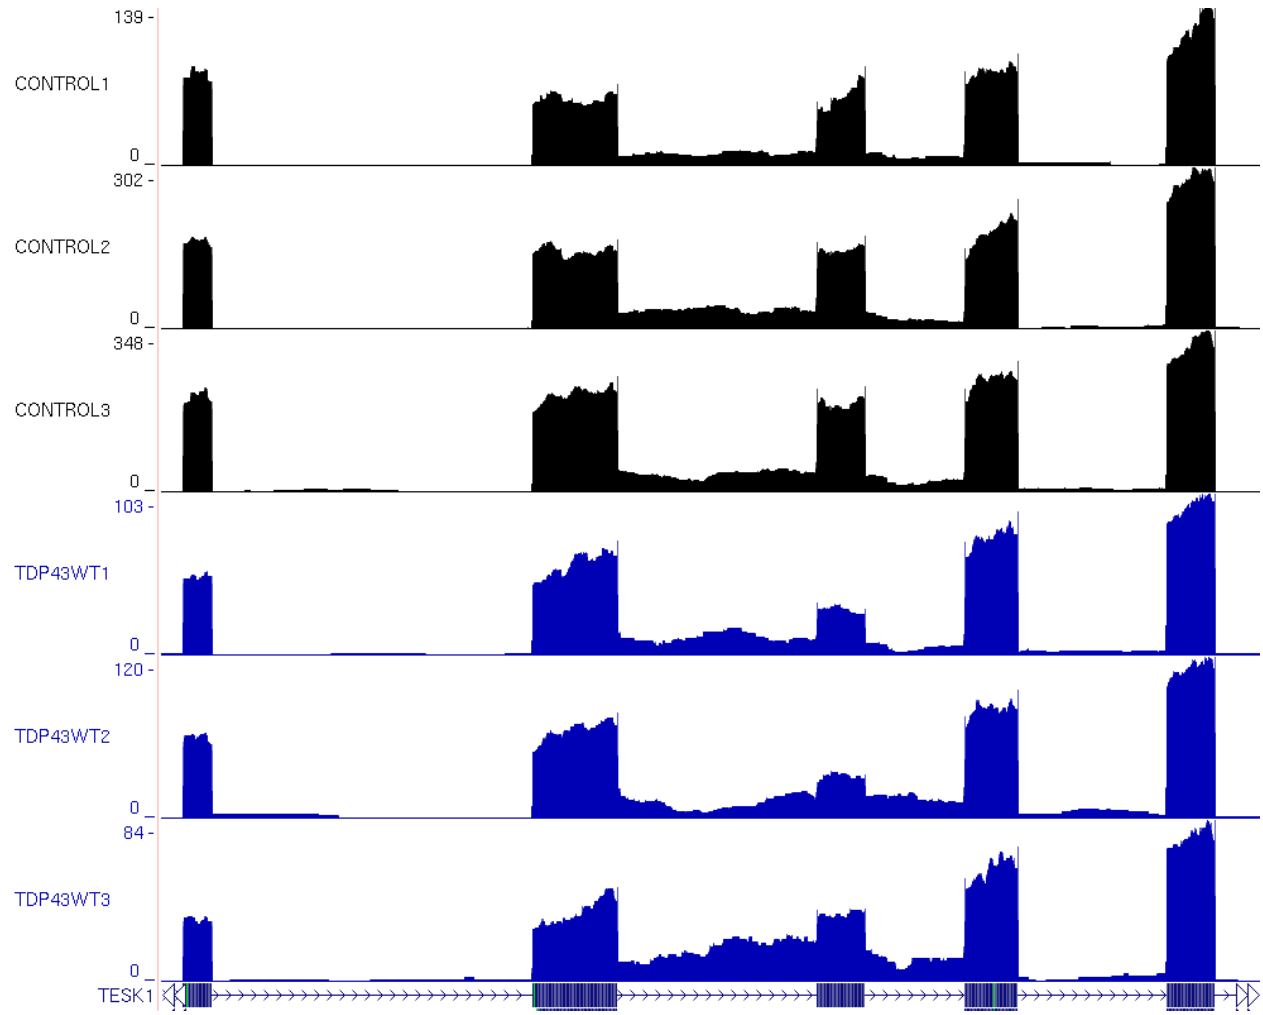

# AAE

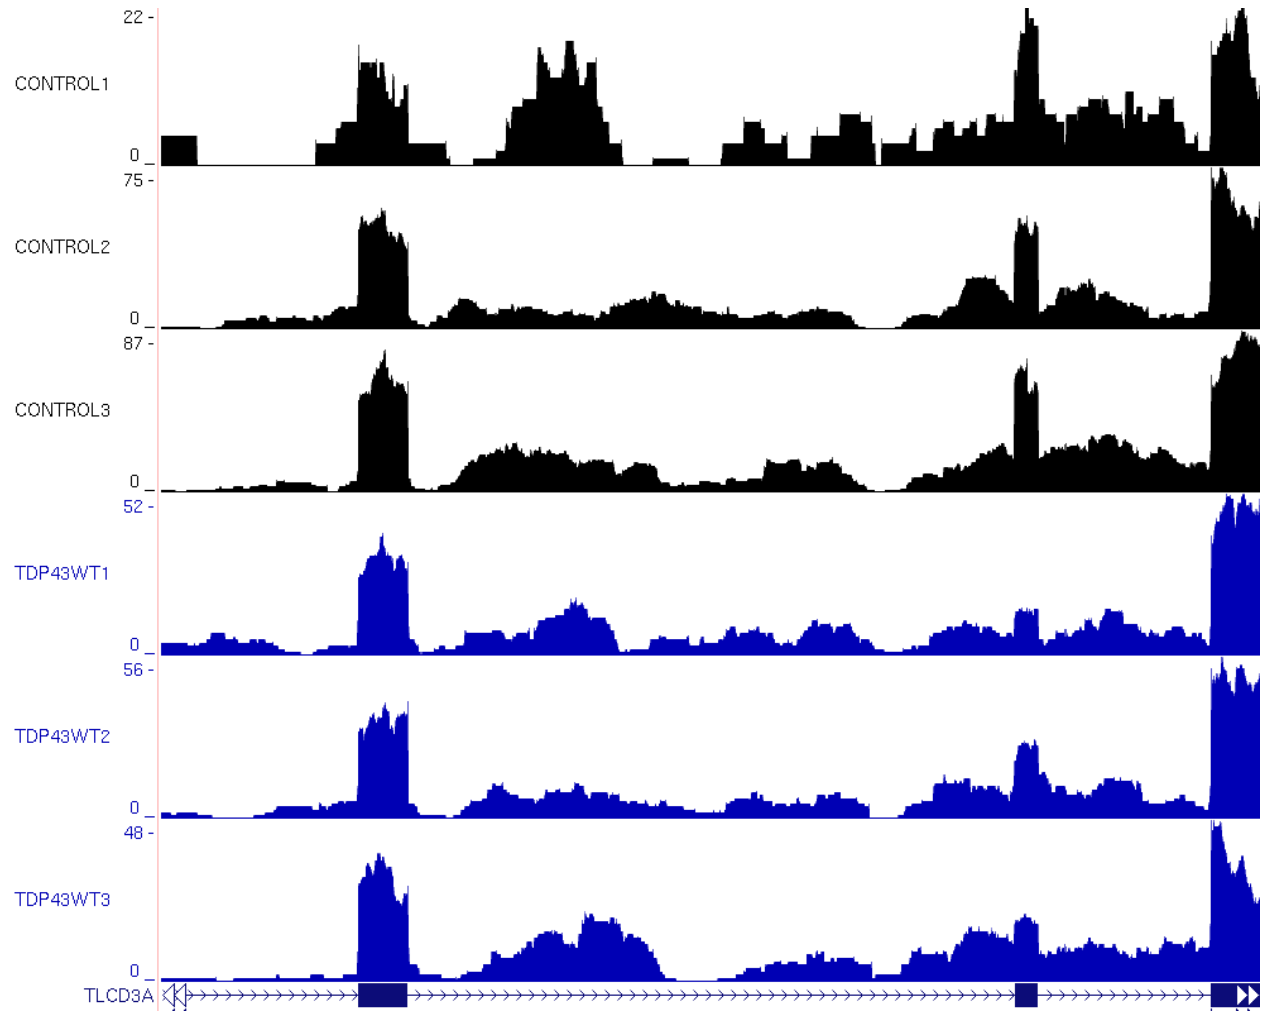

# AAF

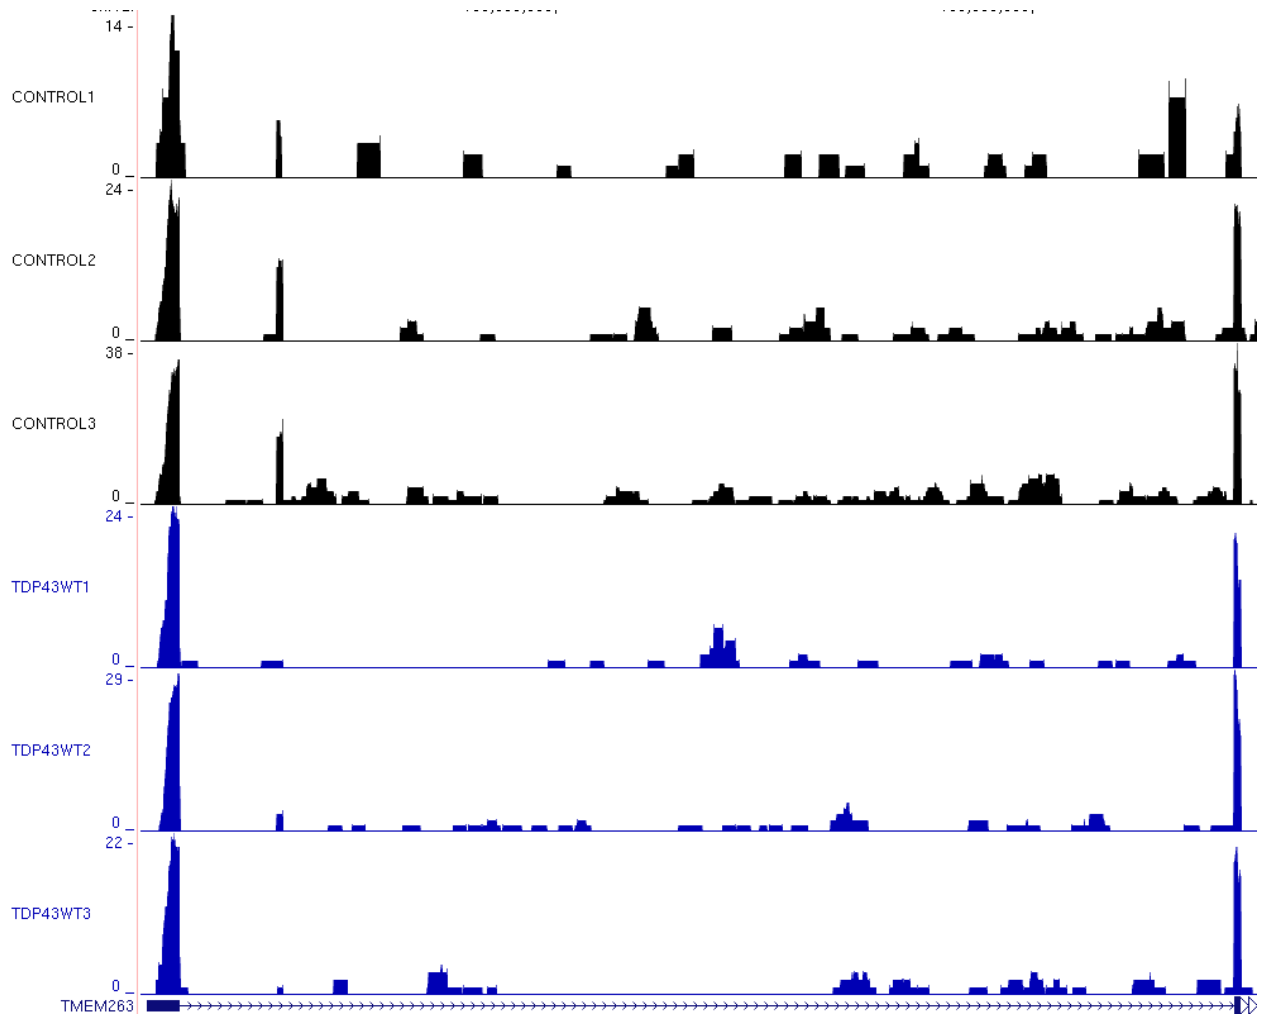

# AAG

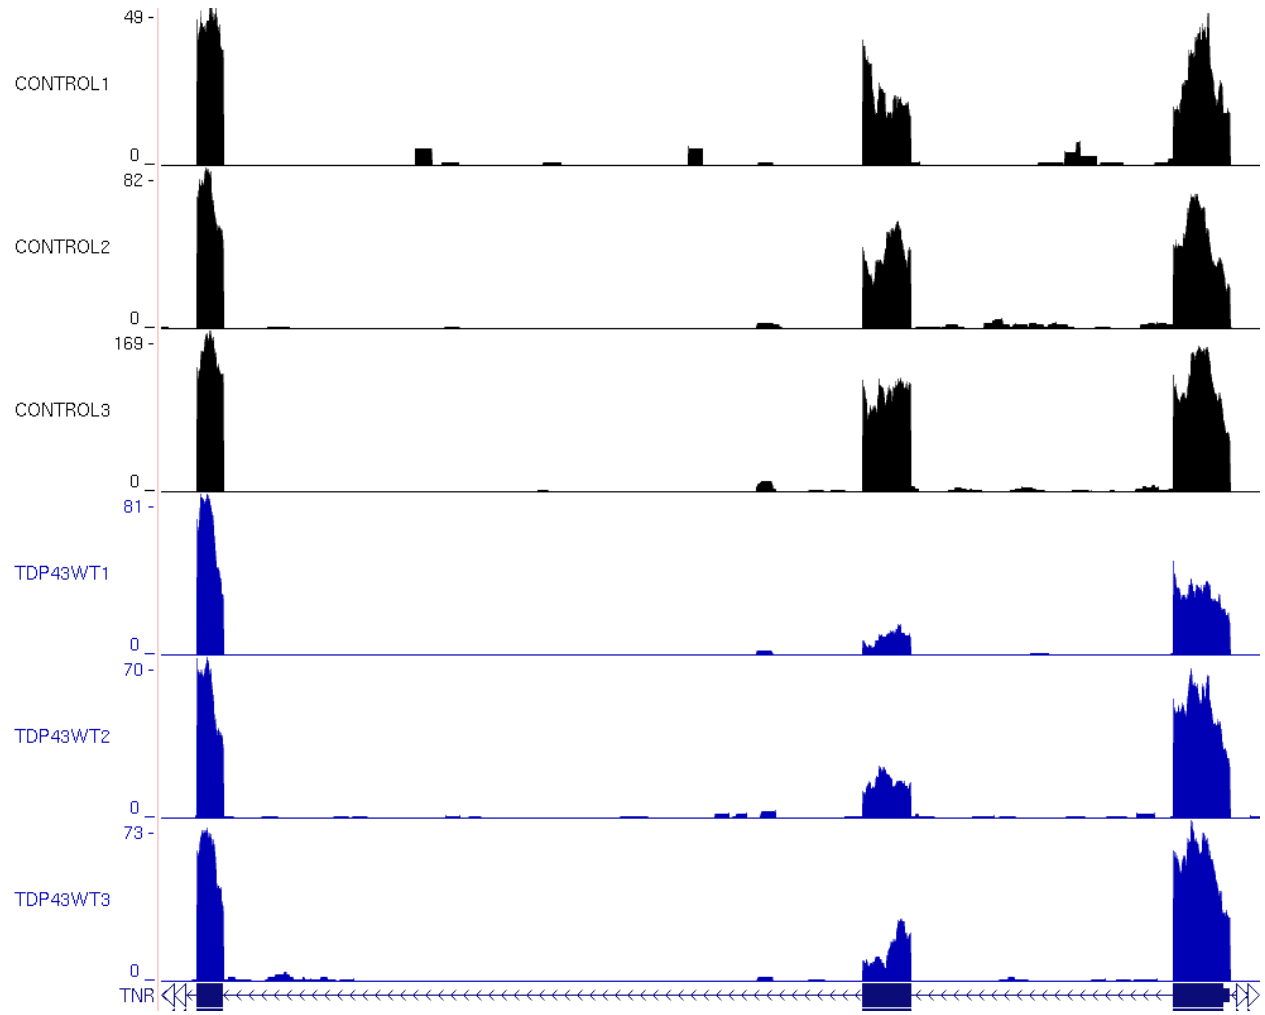

# AAH

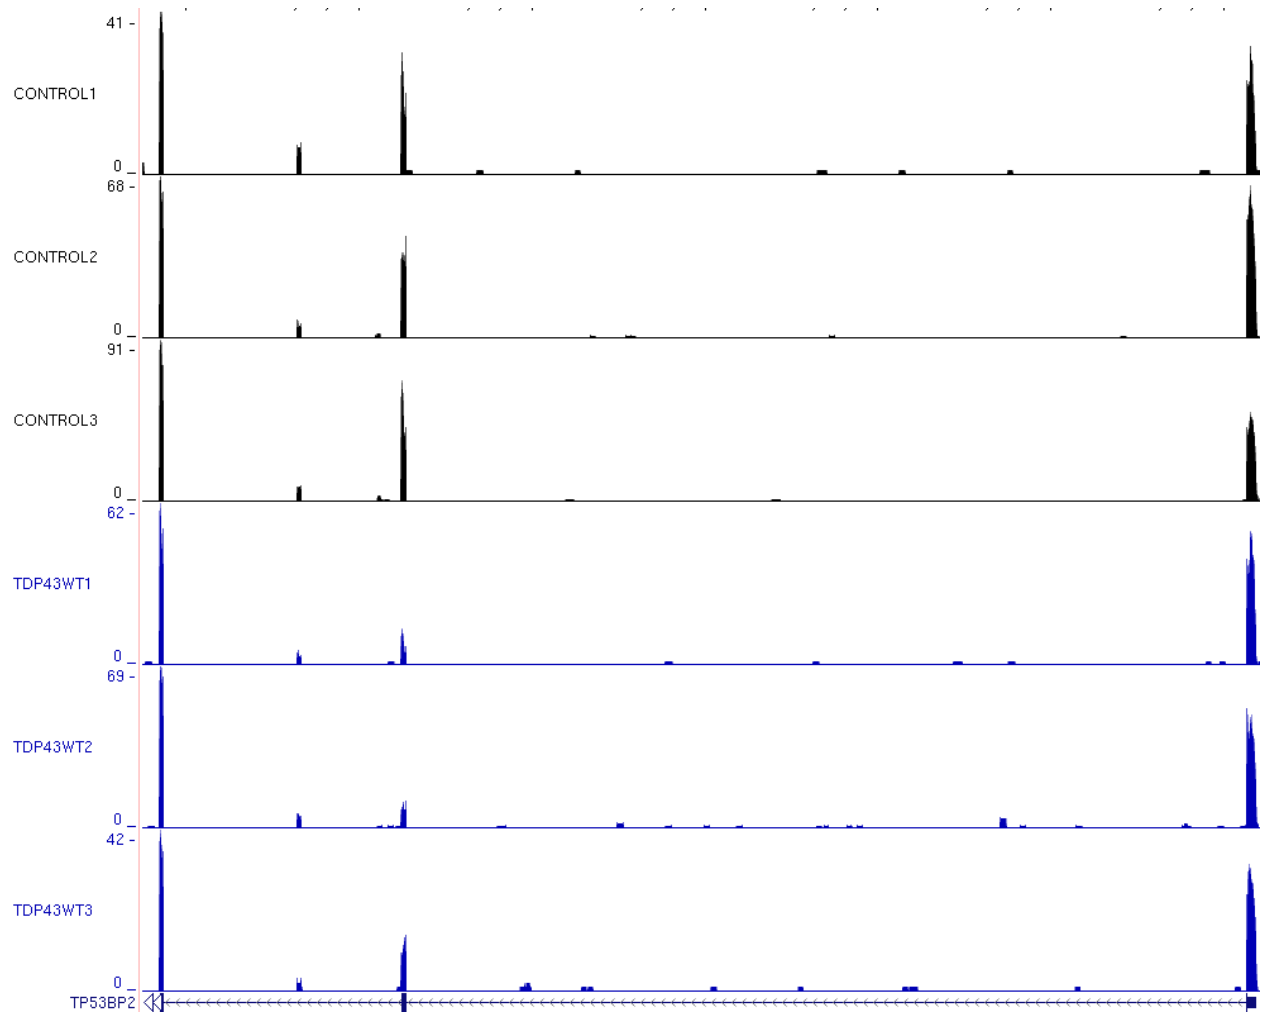

# AAI

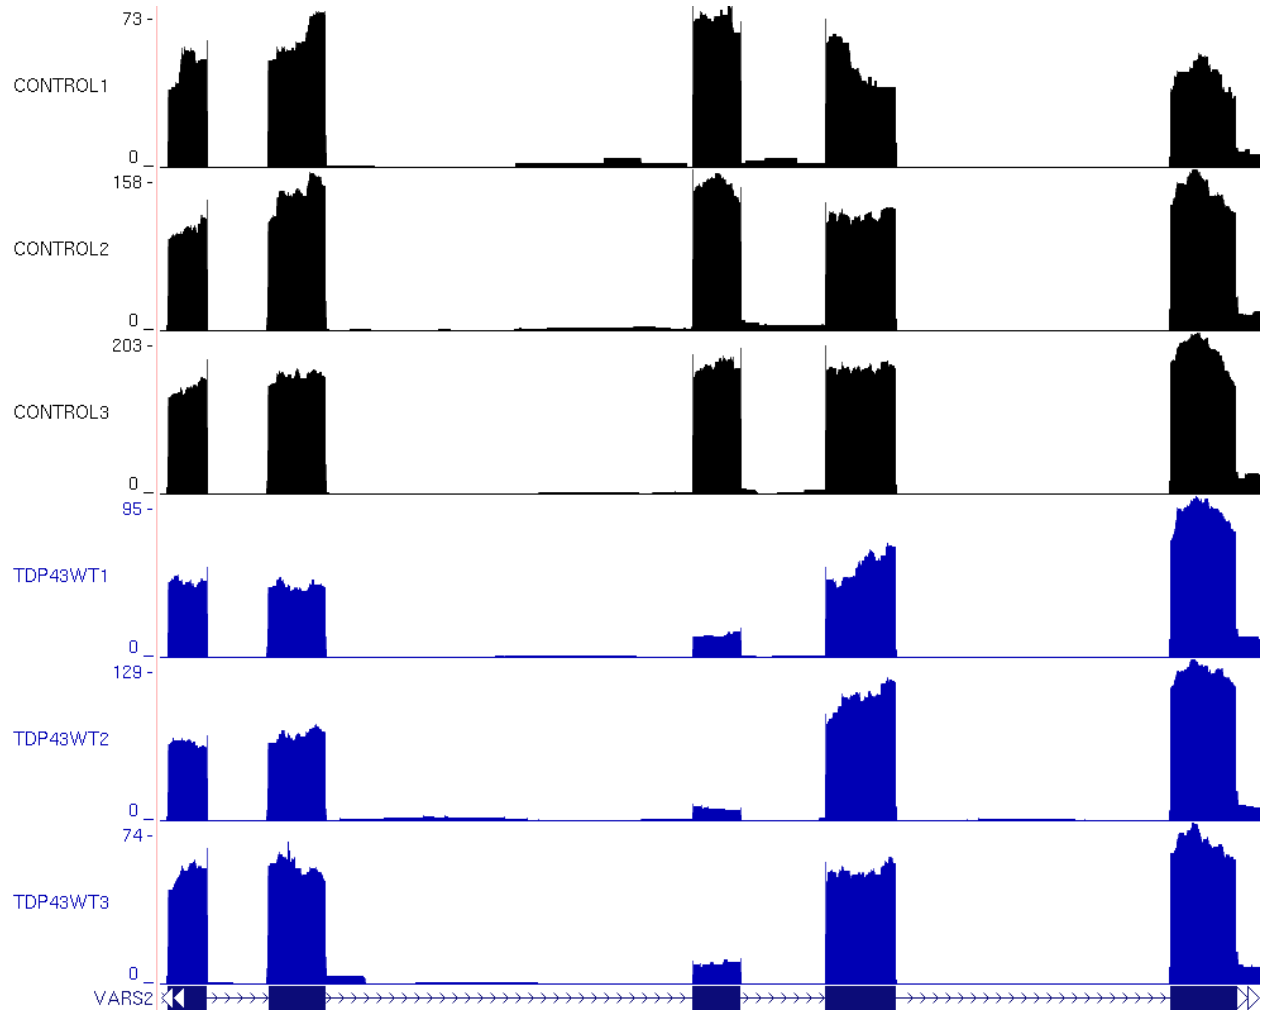

# AAJ

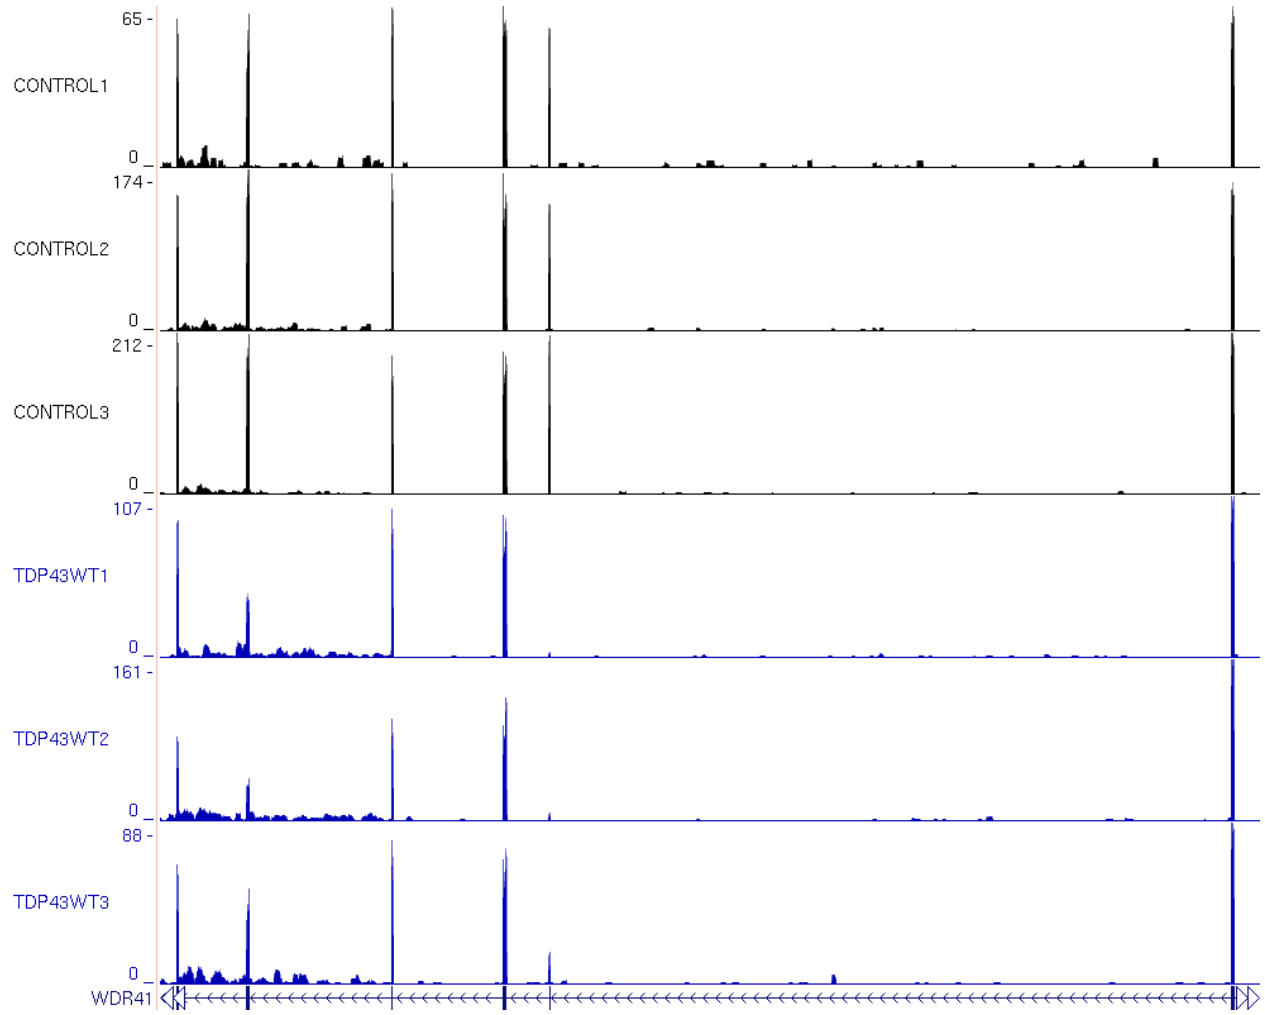

# AAK

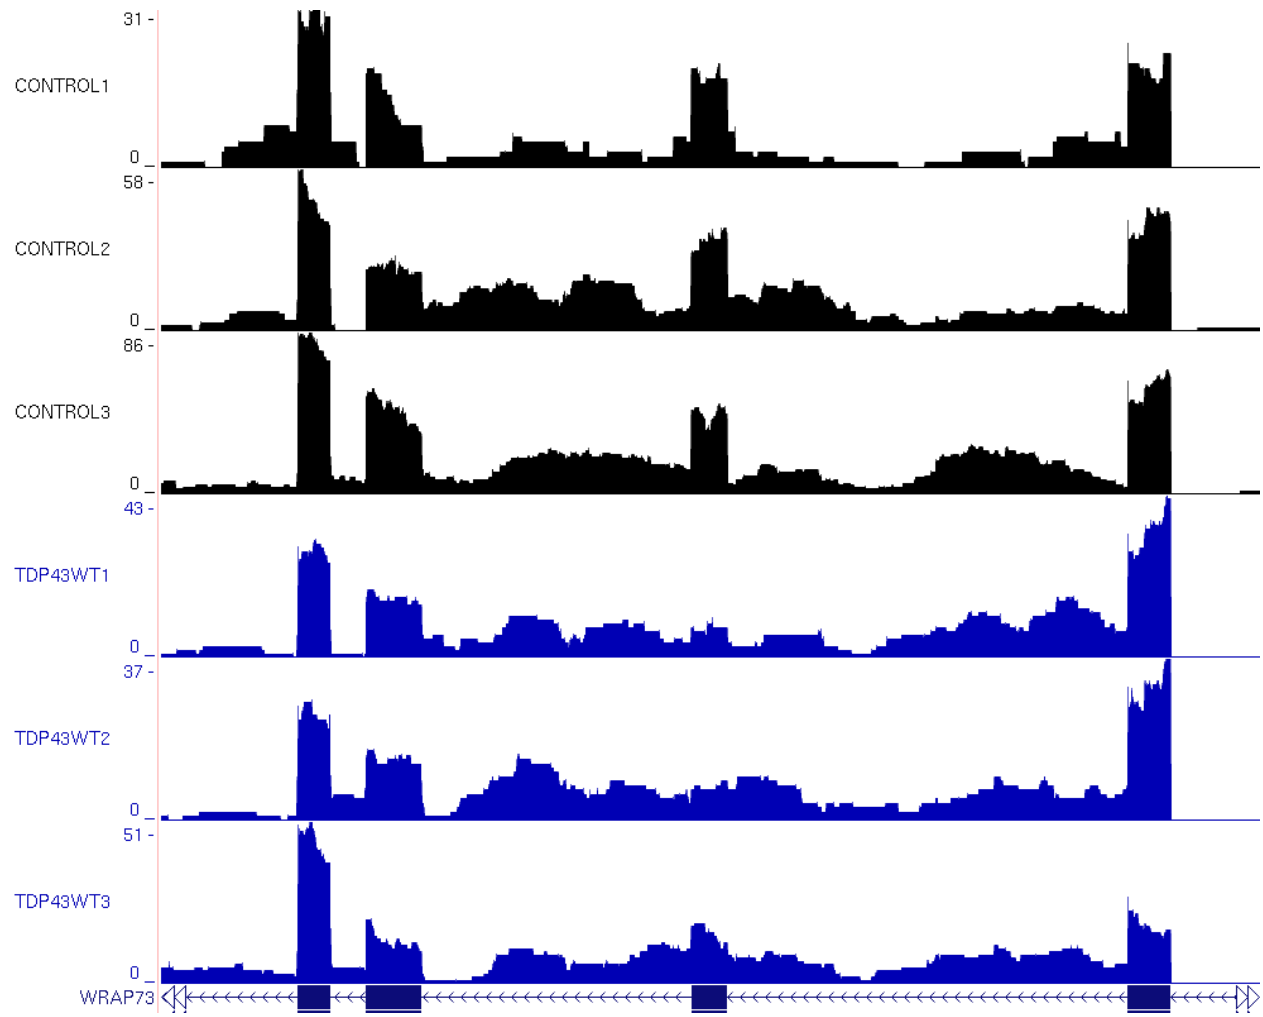



# AAL

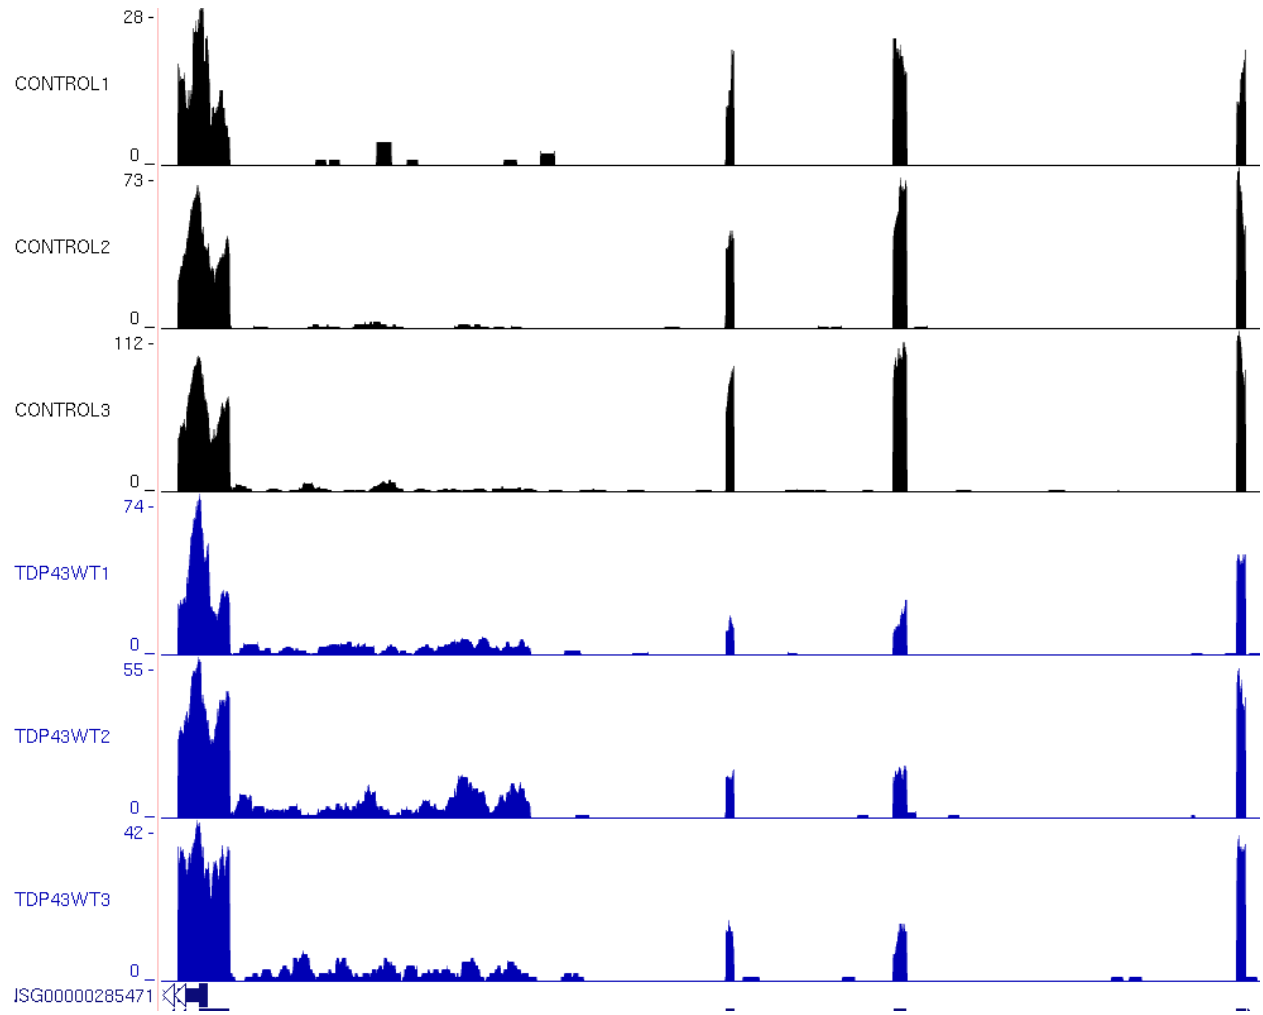

# AAM

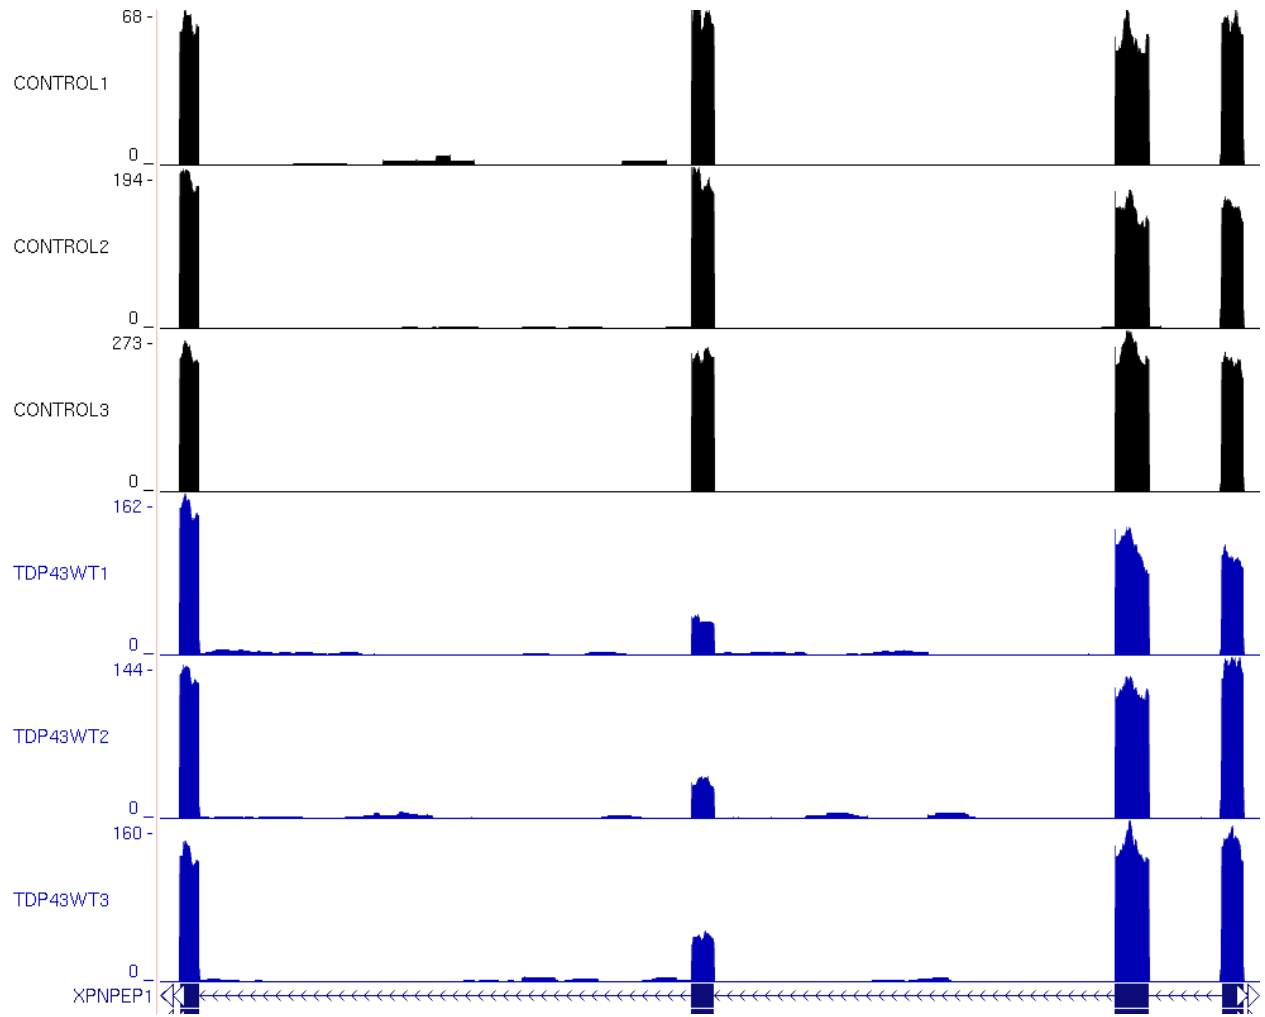

# AAN

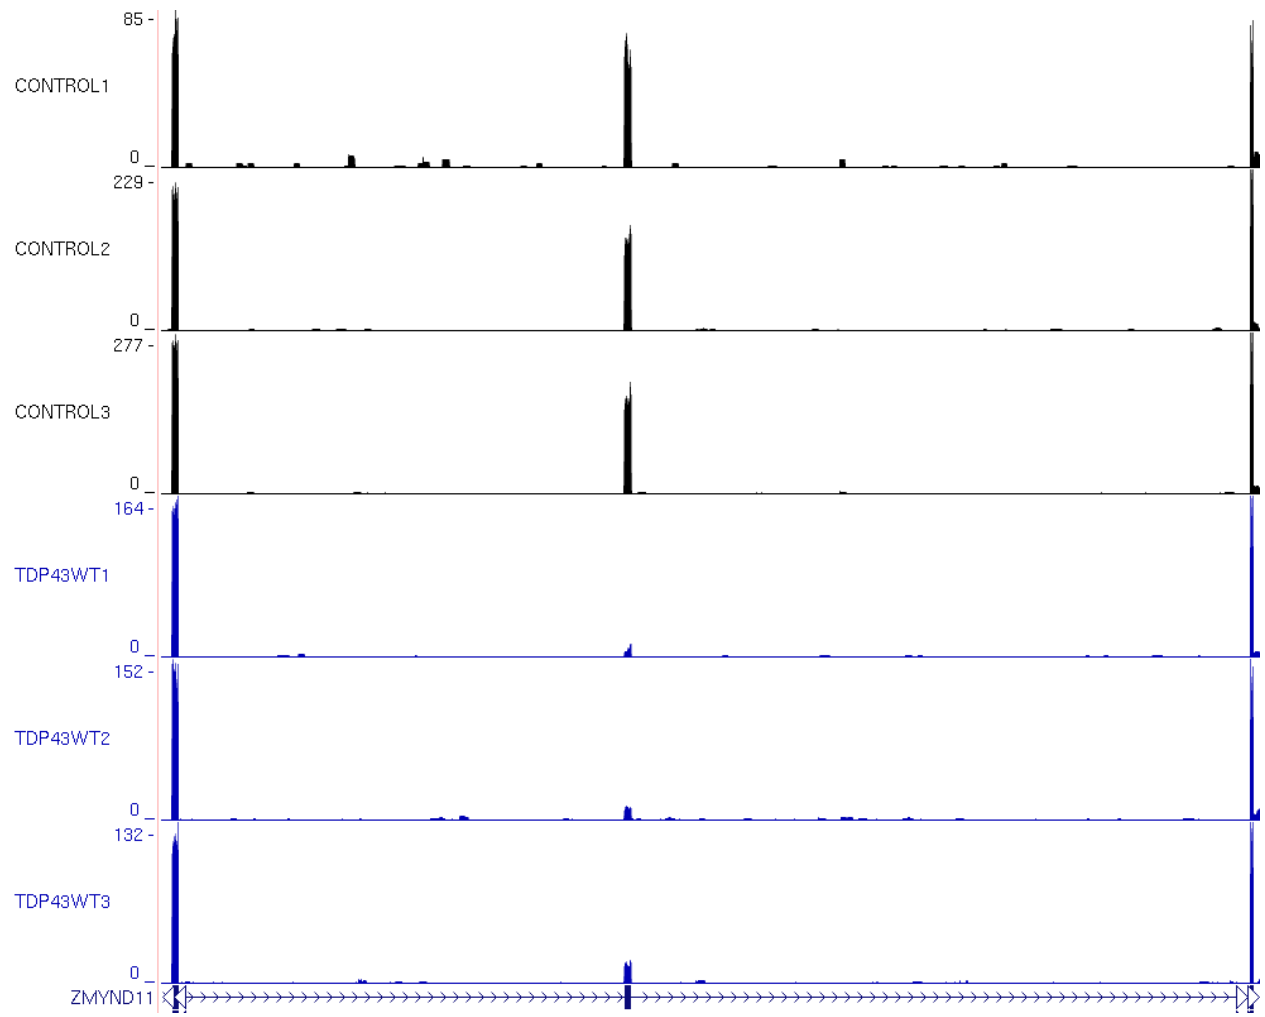

# AAO

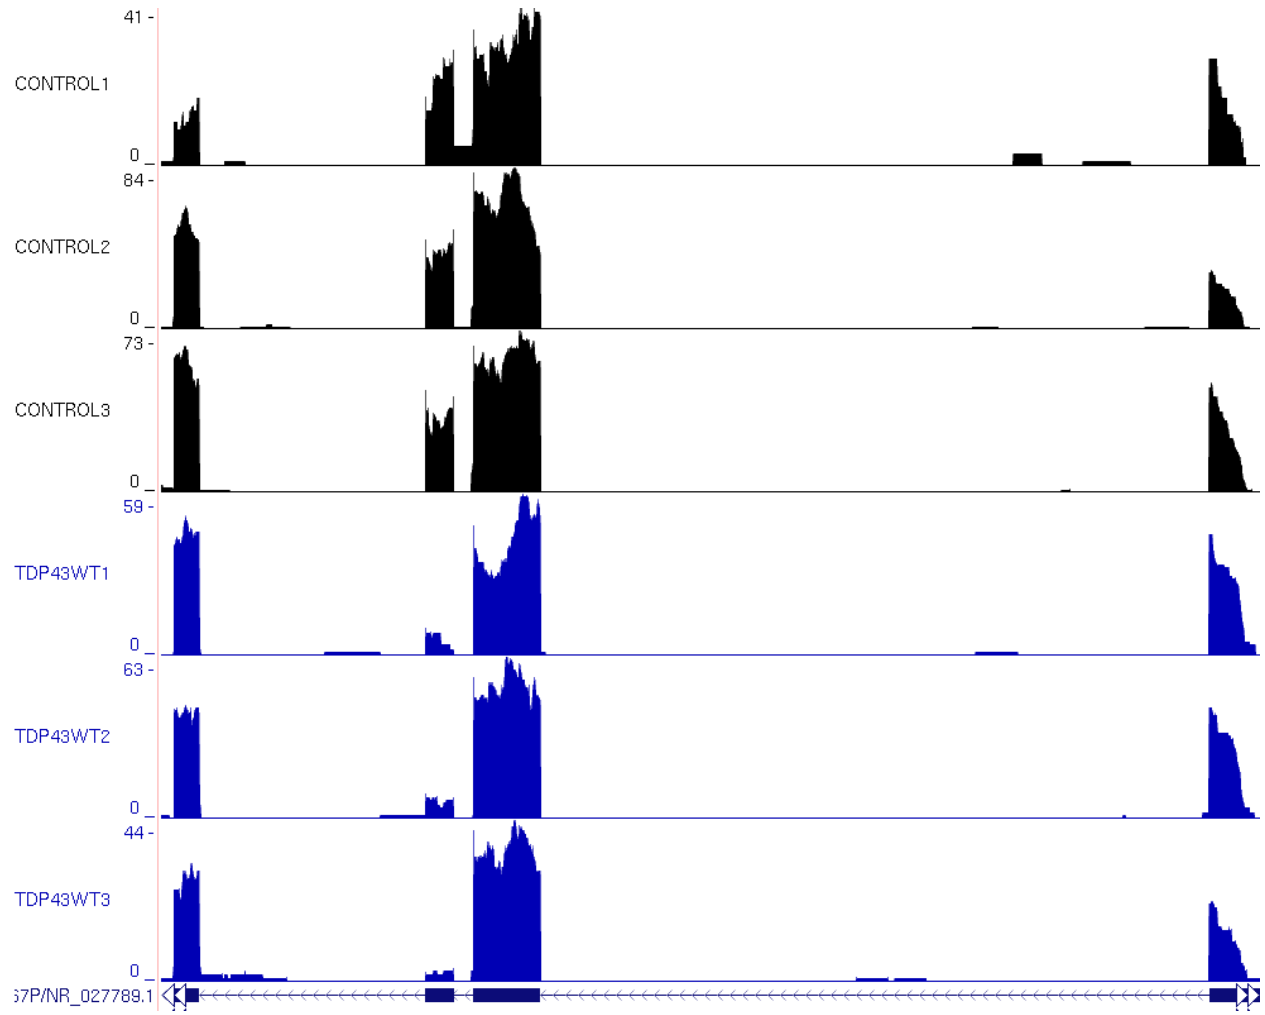

# AAP

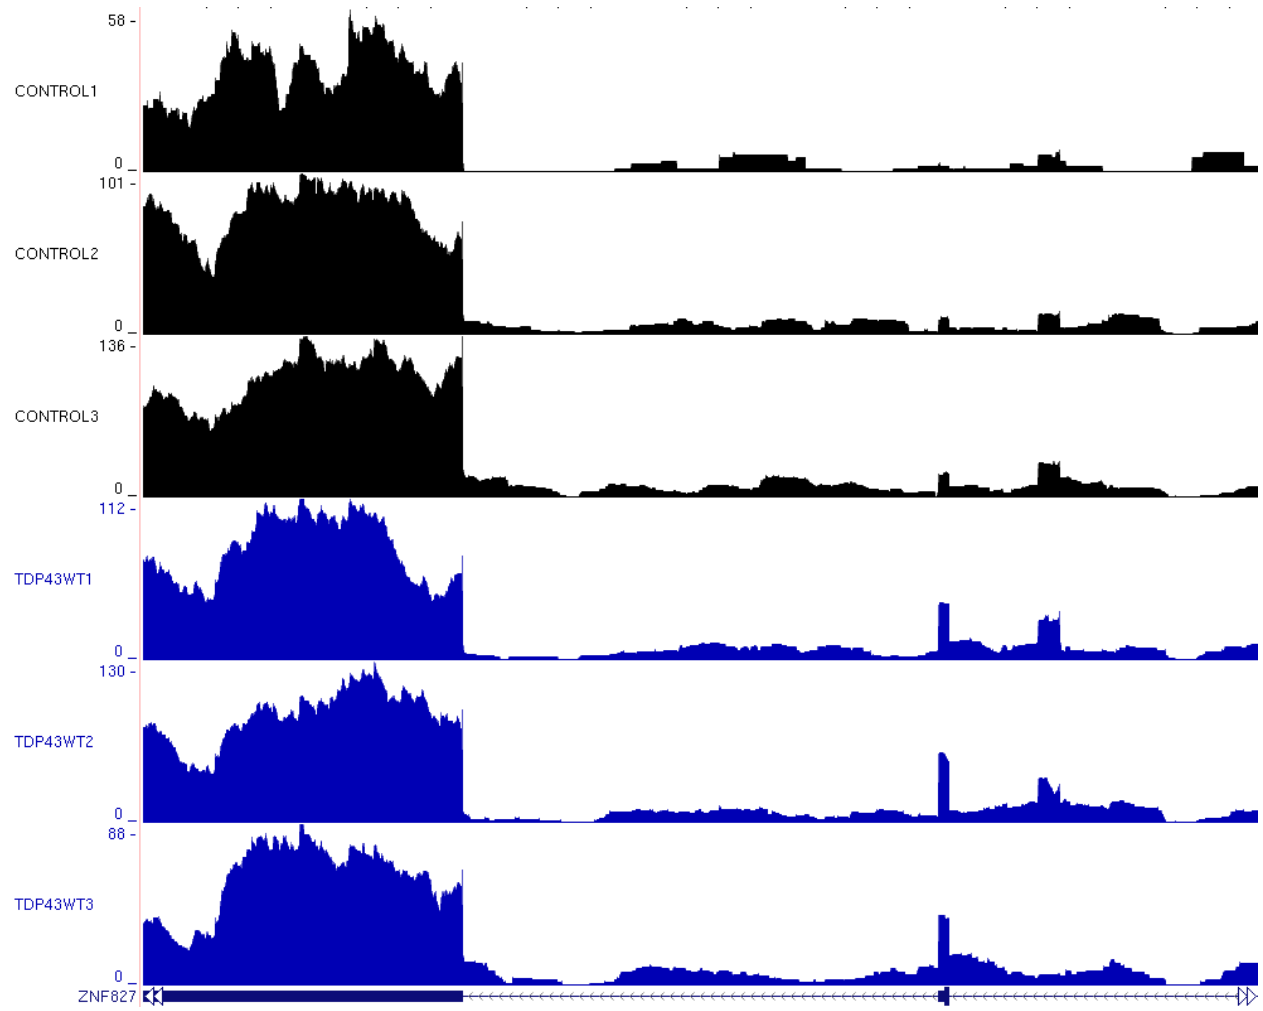

**Supplementary file 2.** Examples of exon skipping events taken from UCSC genome browser from i3N human neurons infected with lentivirus overexpressing TDP-43<sup>WT</sup>, (TDPWT1, TDPWT2, TDPWT3) and i3N non infected cells (CONTROL1, CONTROL2, CONTROL3). A = ADAM23, B = AMT, C = BMPR1A, D = BRI3BP, E = CANX, F = CCDC126, G = CERT1, H = CLASP2, I = COQ5, J = CSDE1, K = CSPP1, L = DDL2, M = DRGX (cryptic exon), N = ELP1, O = ELP2, P = ERMAD, Q = FAM66C, R = FAM102A, S = FAT1, T = FBRS, U = FBXO22, V = FRAS1, W = GART, X = HARS2, Y = HCFC2, Z = HIRA, AA = HYOU1, AB = INTS10, AC = ITGB1, AD = KCNMA1, AE = LGI4 (cryptic exon), AF = LINC00680-GUSBP4, AG = MYBBP1A, AH = NHLRC3, AI = NICN1, AJ = NIFK, AK = NIPAL3, AL = NRCAM, AM = NUP88, AN = NUP93, AO = PLXNB1, AP = PPA1, AQ = PTS, AR = RABGGTB, AS = RCHY1, AT = RHOT2, AU = RNF114, AV = SBF1, AW = SCN3A, AX = SCN9A, AY = SESN3, AZ = SLC17A5, AAA = SLC35A5, AAB = SRPK2, AAC = STC2, AAD = TESK1, AAE = TLCD3A, AAF = TMEM263, AAG = TNR, AAH = TP53BP2, AAI = VARS2, AAJ = WDR41, AAK = WRAP73, AAL = WSCD1, AAM = XPNPEP1, AAN = ZMYND11, AAO = ZNF767P, AAP = ZNF827.
